# Supplementary material
Source: PubMed Central journal article supplement (PMC2812663)

**Intramolecular Oxamidation of Unsaturated *O*-Alkyl Hydroxamates:  
A Remarkably Versatile Entry to Hydroxy Lactams**

*Duncan J. Wardrop,\* Edward G. Bowen, Raymond E. Forslund,  
Adam D. Sussman and Samantha L. Weerasekera*

Department of Chemistry, University of Illinois at Chicago,  
845 West Taylor Street, Chicago, IL 60607-7061.

***Supporting Information, Part 2***

\* Corresponding author:  
Tel: 312-355-1035  
Fax: 312-996-0431  
E-mail: wardropd@uic.edu

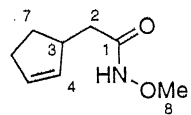**1a**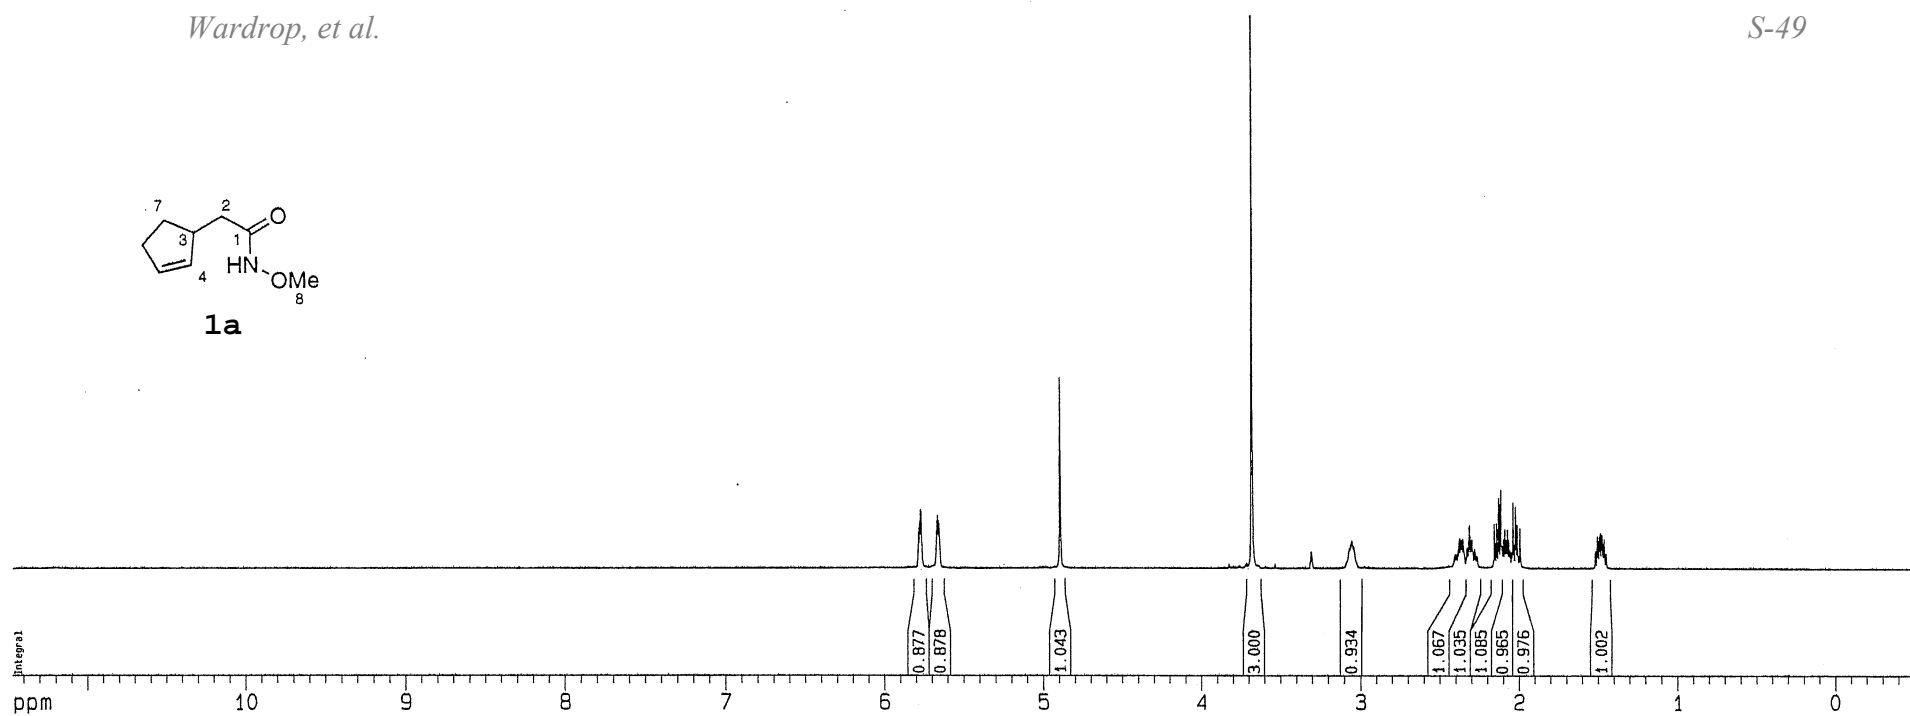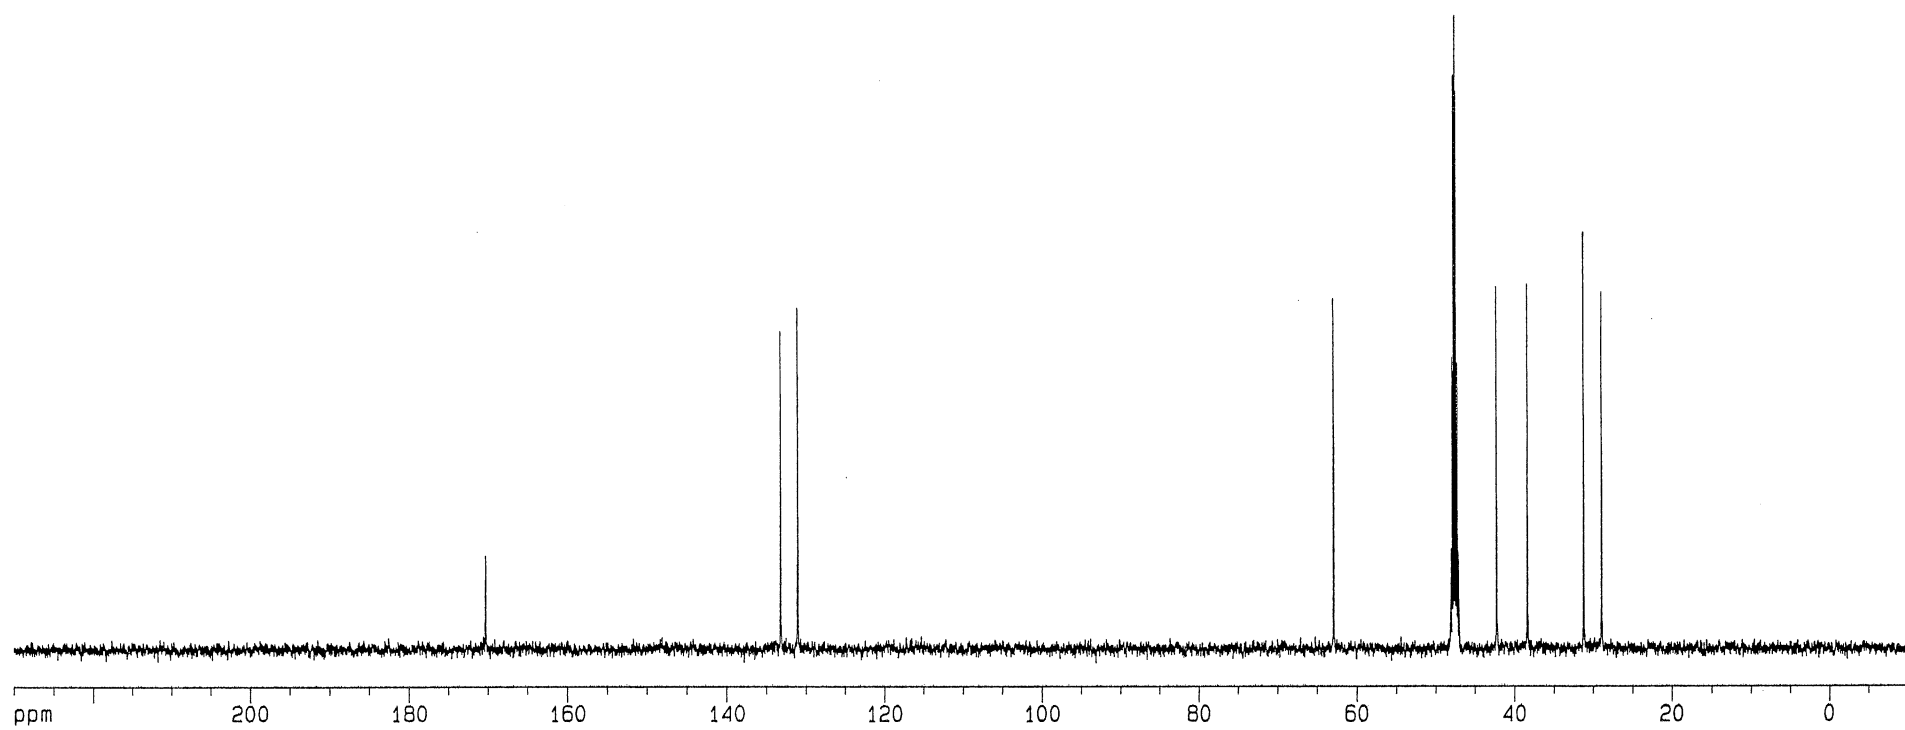

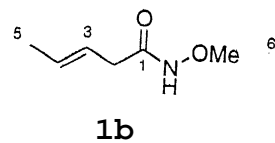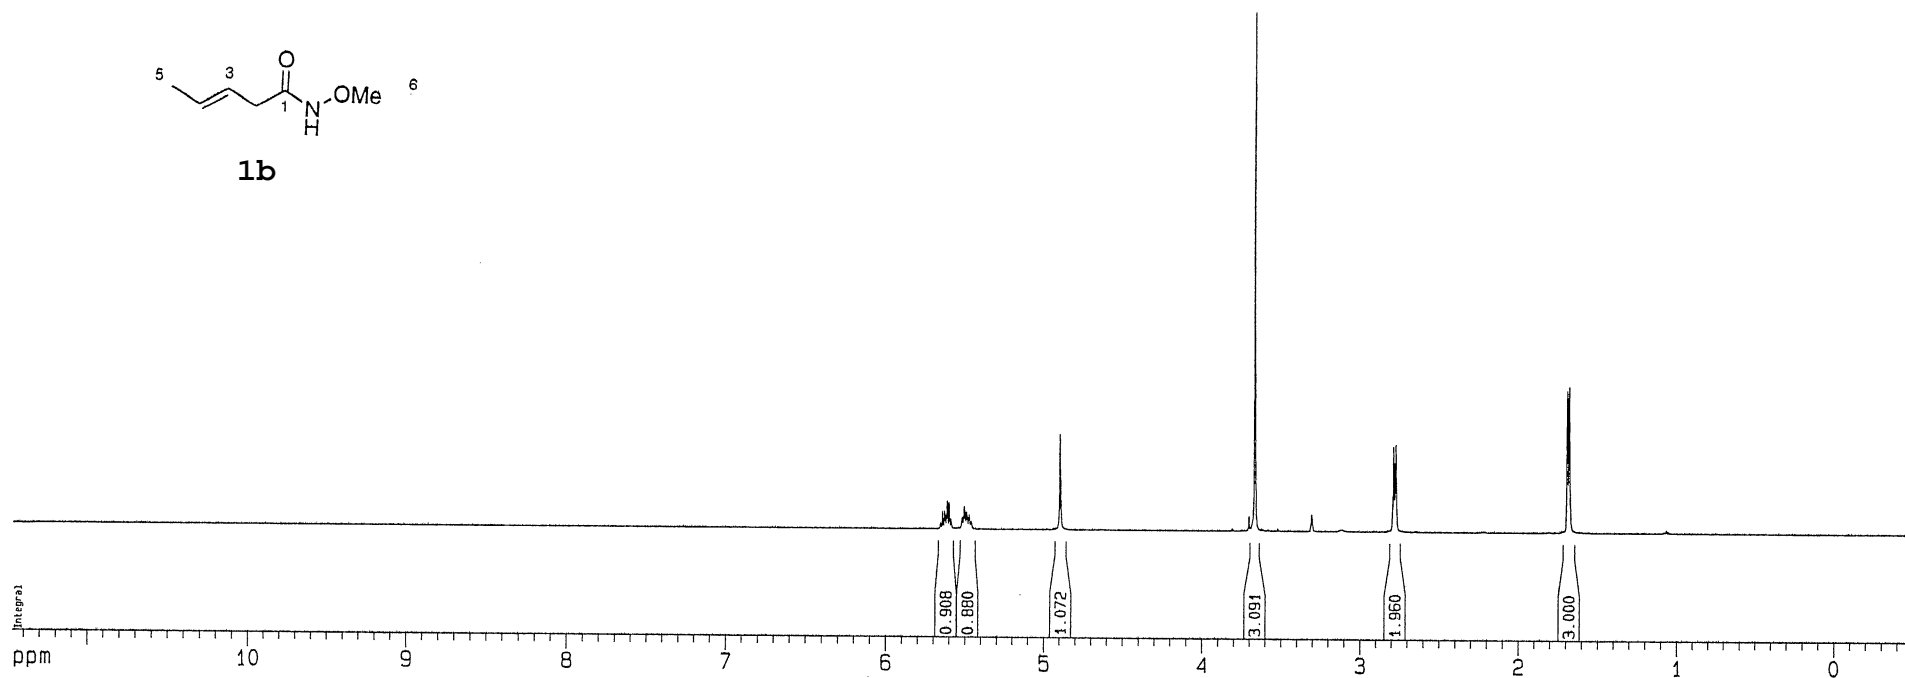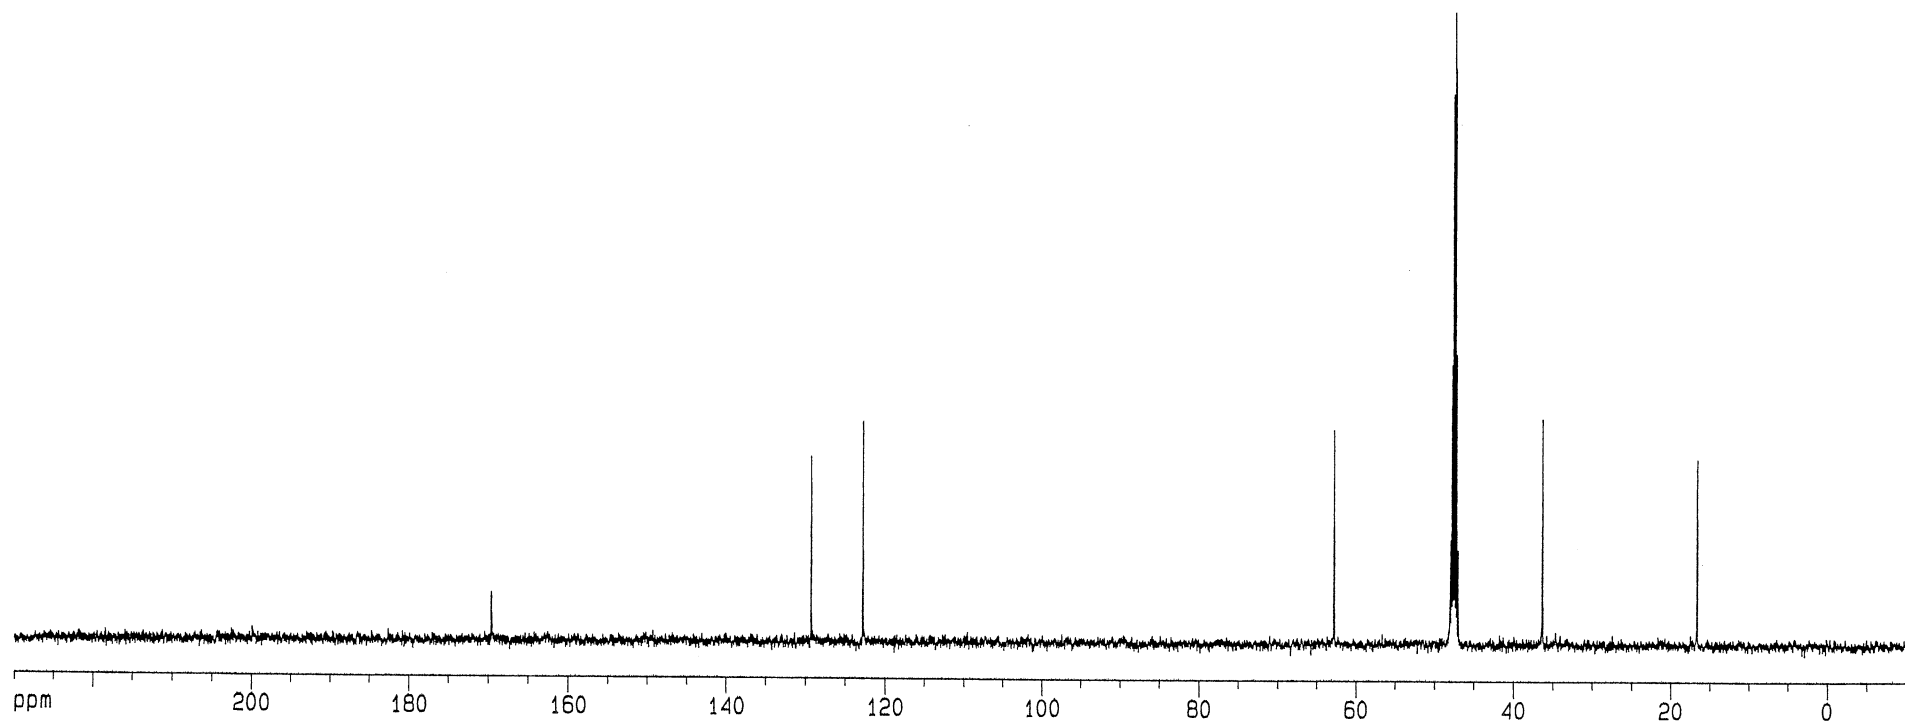

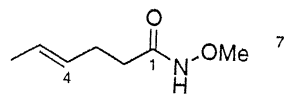**1c**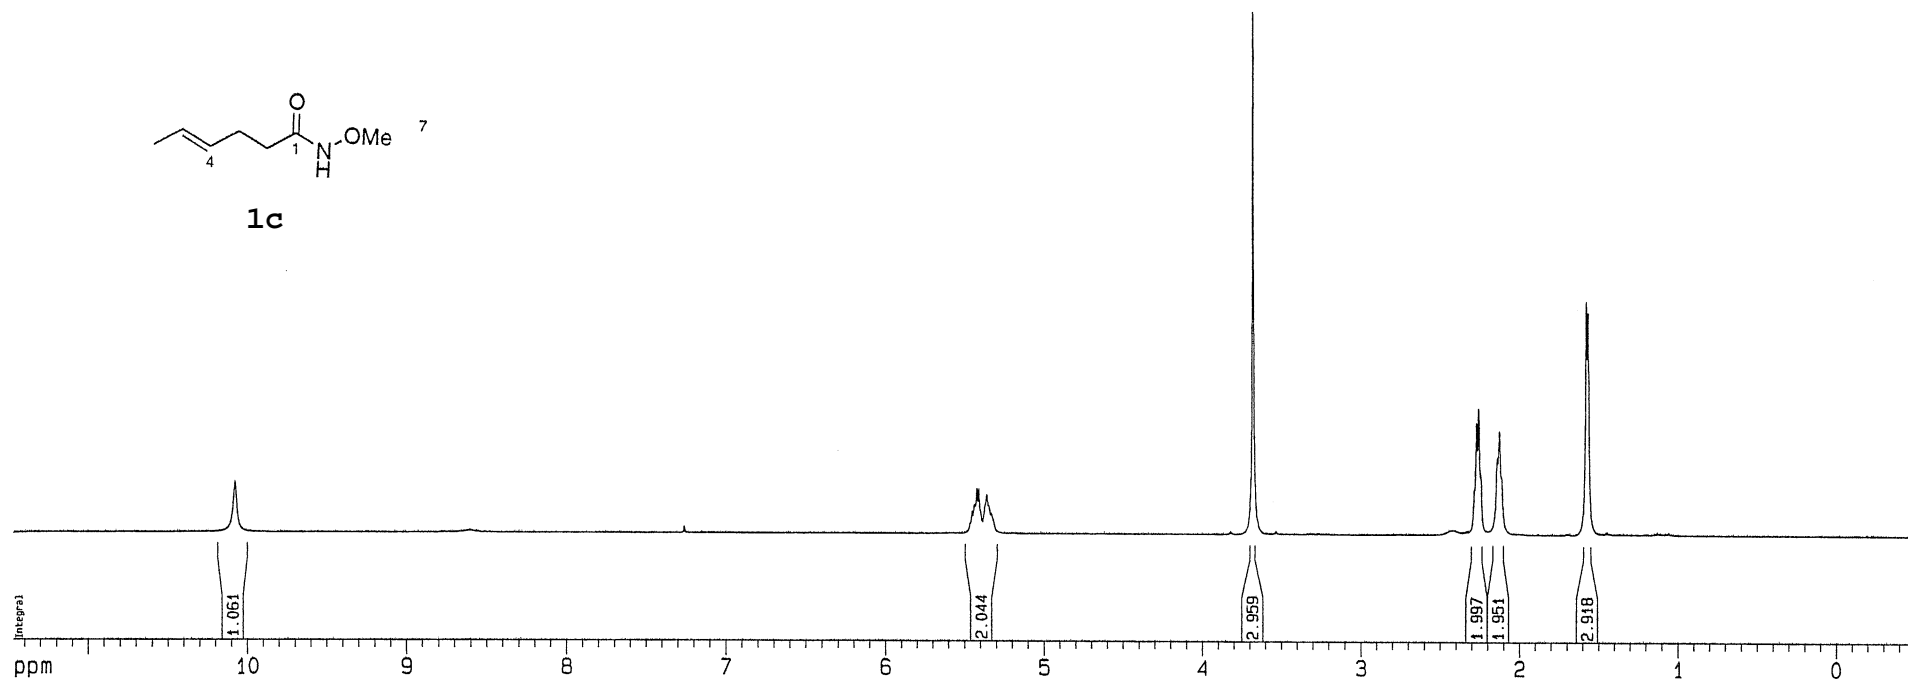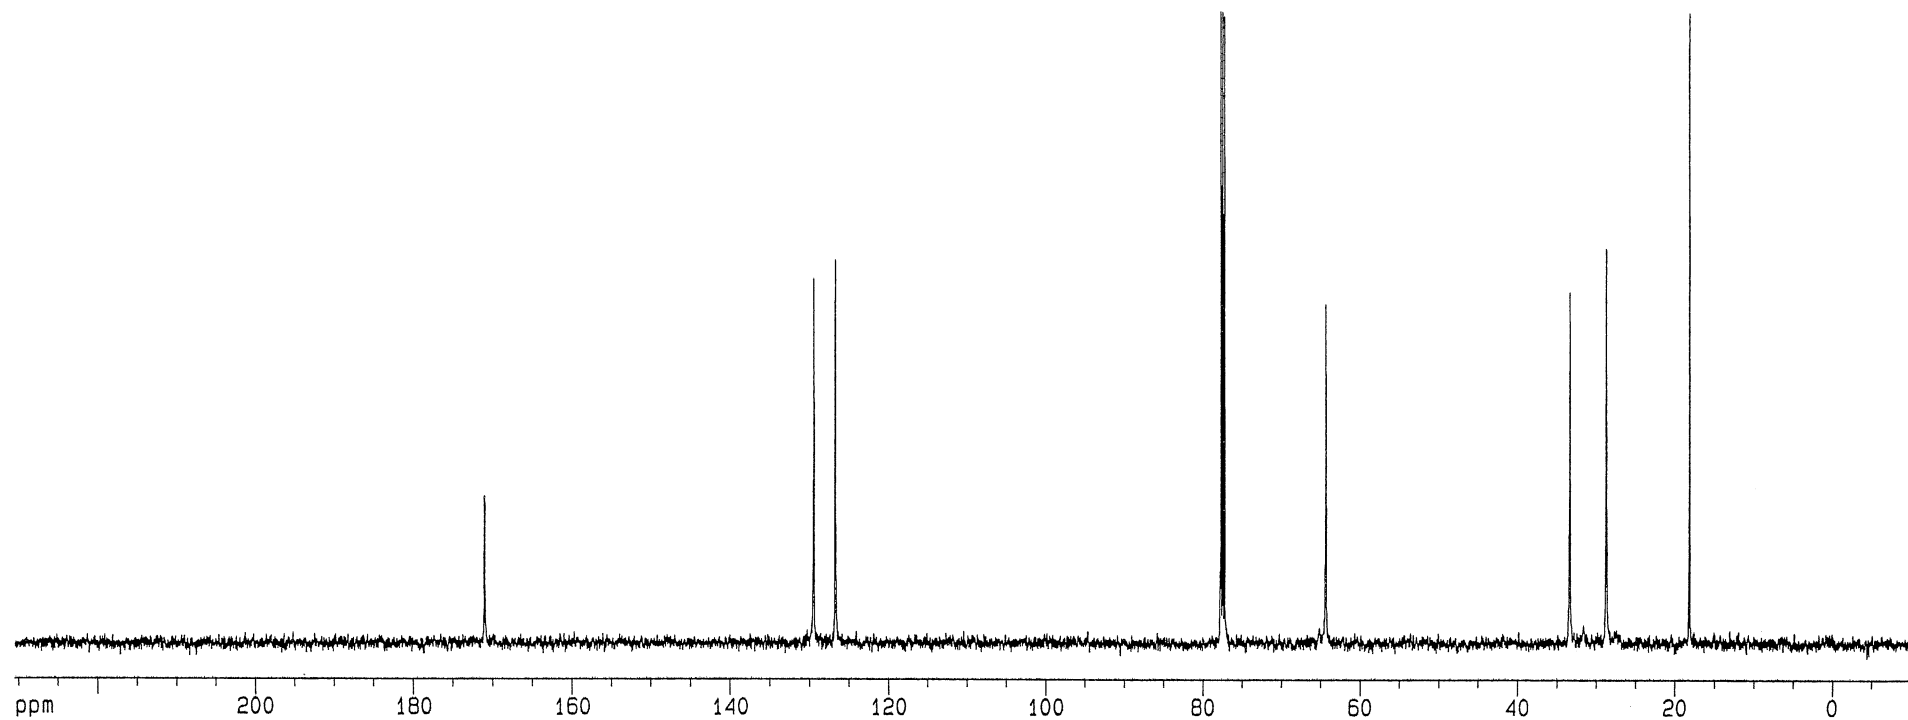

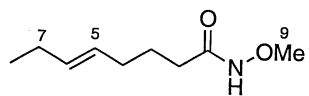

1d

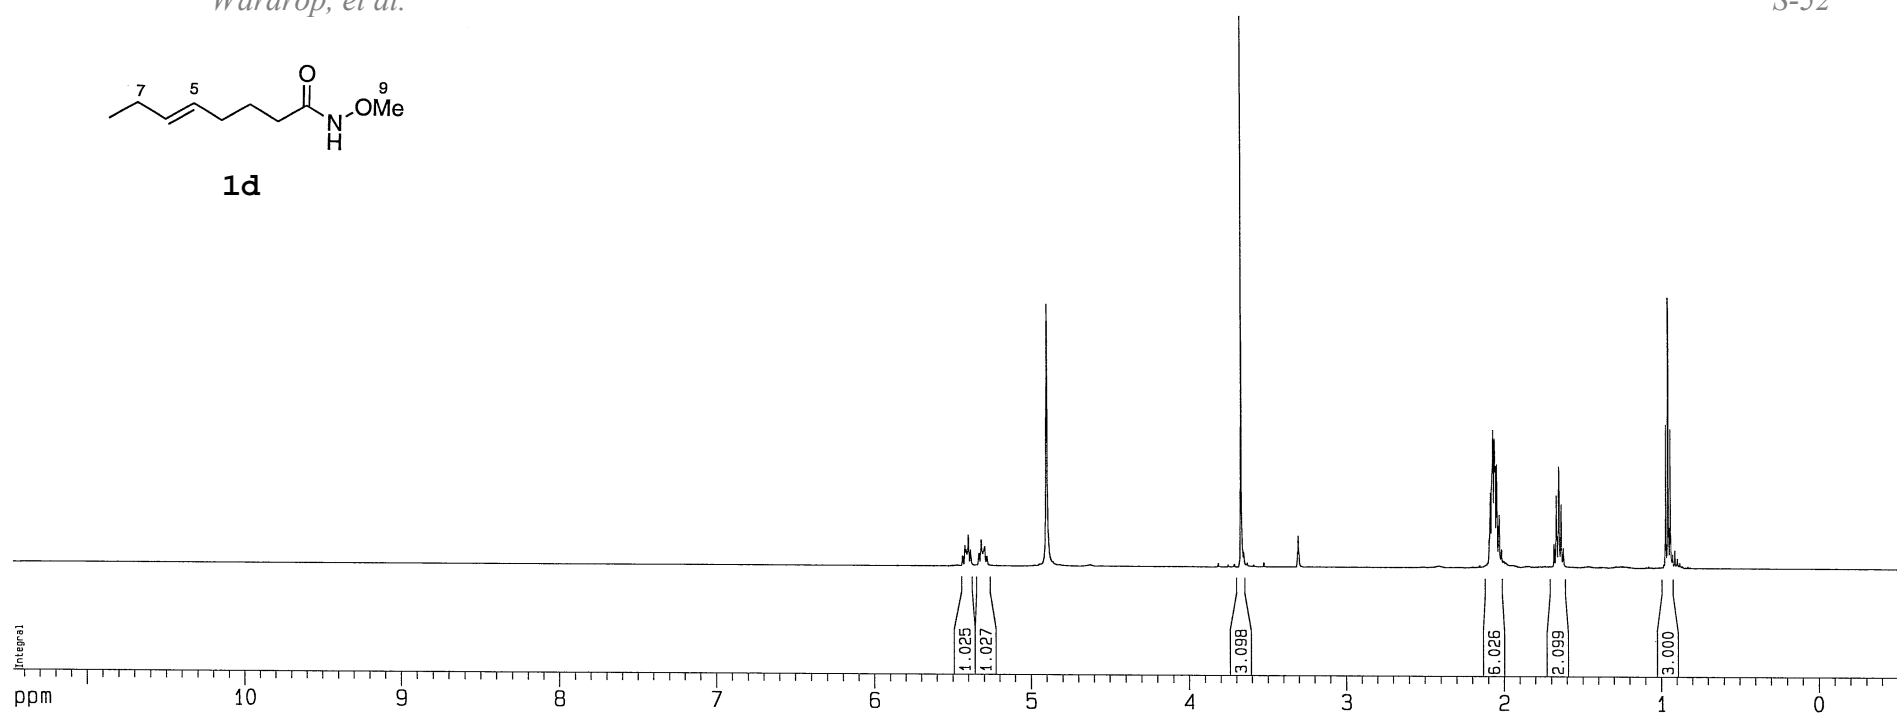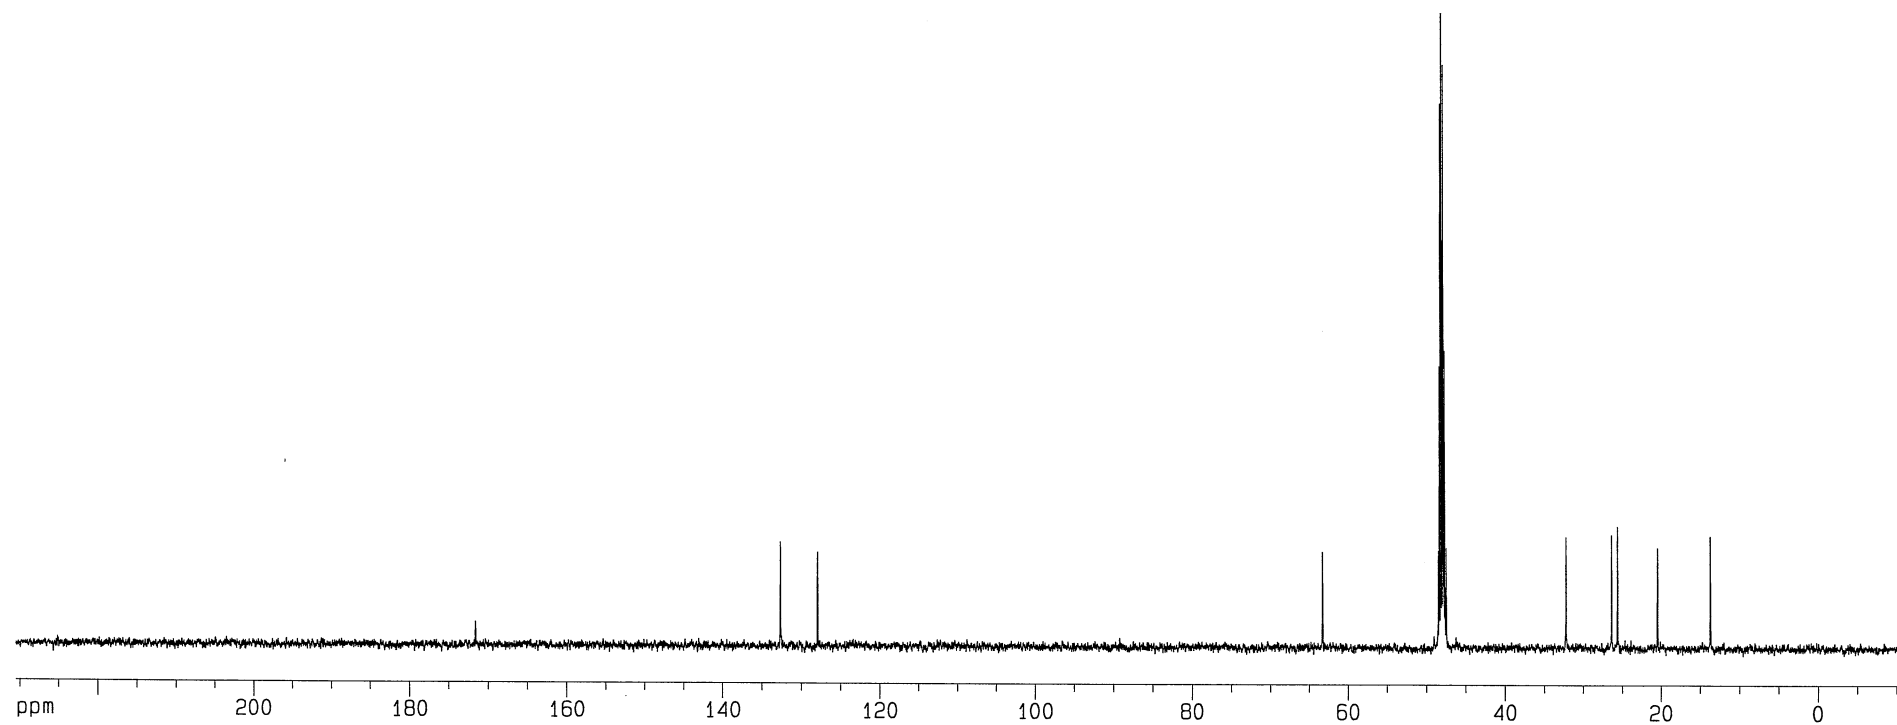

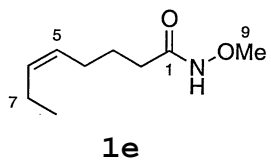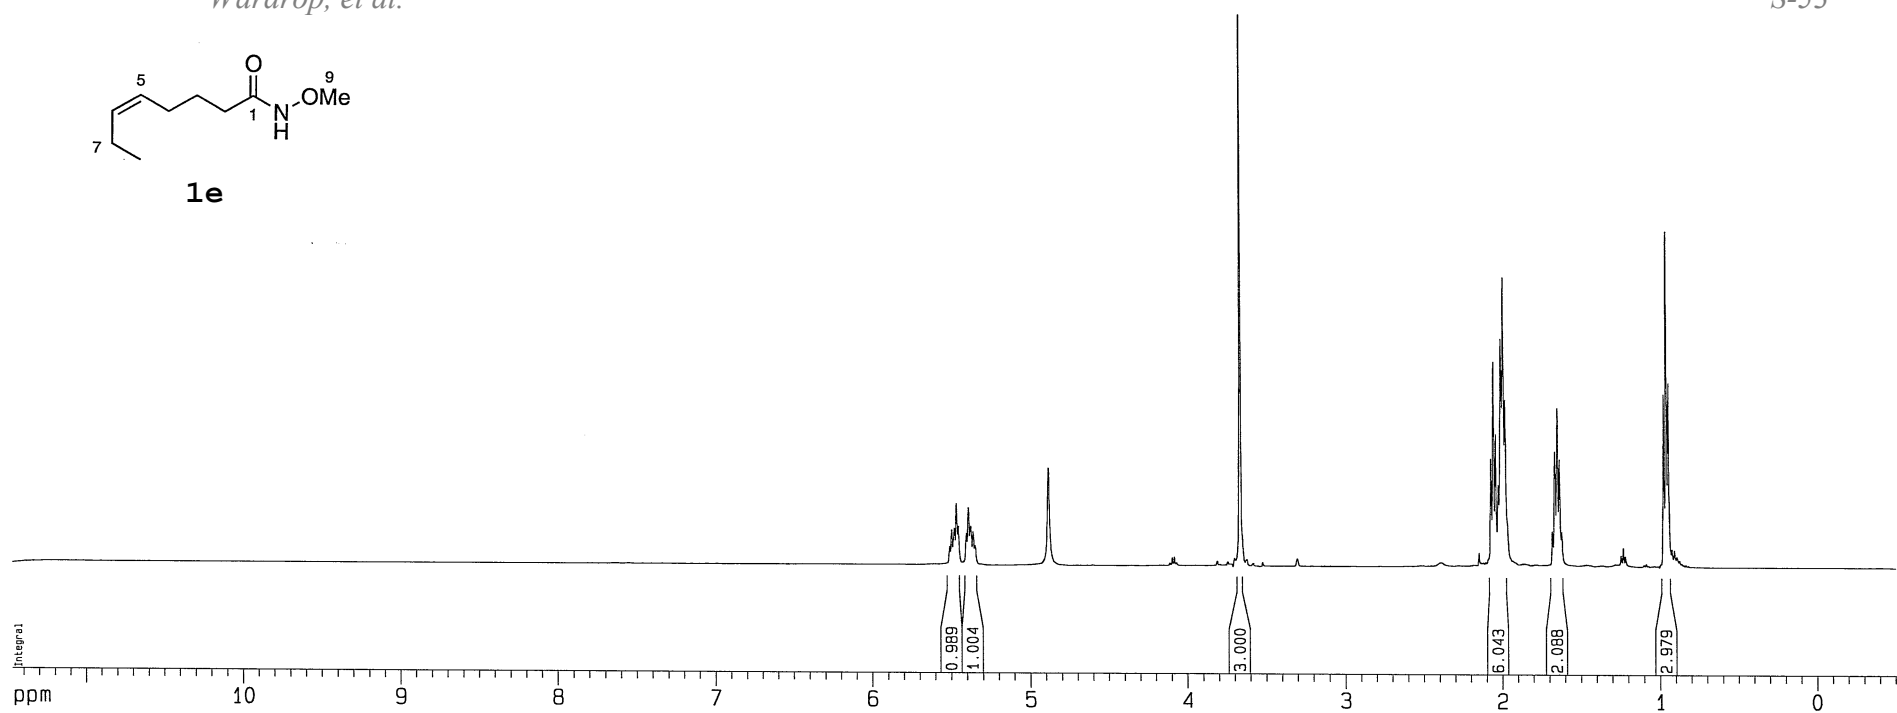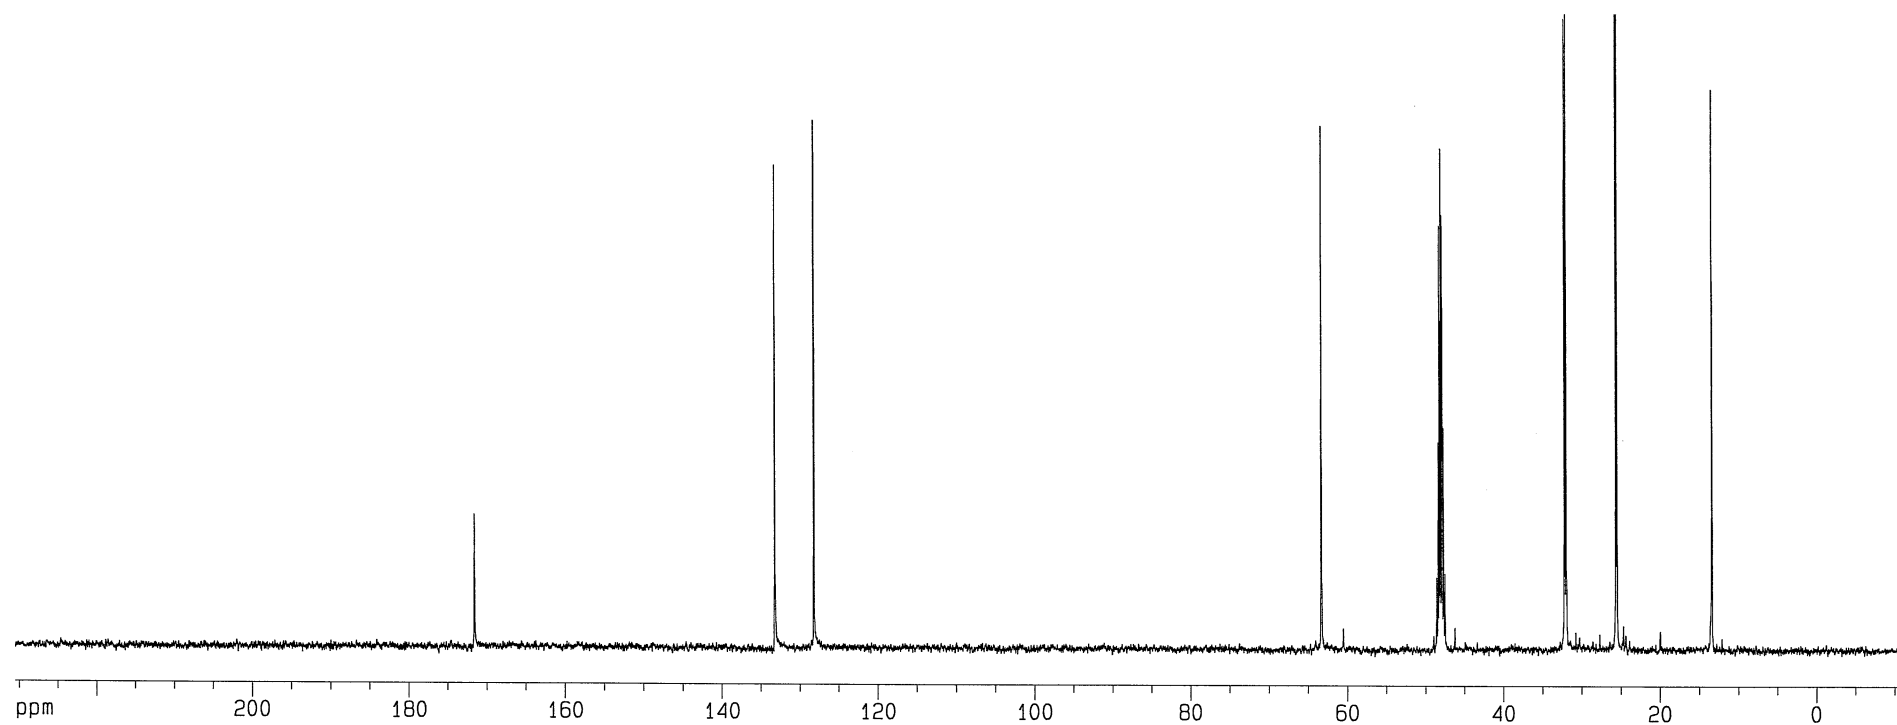

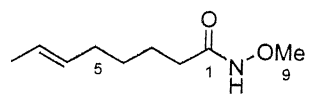**1f**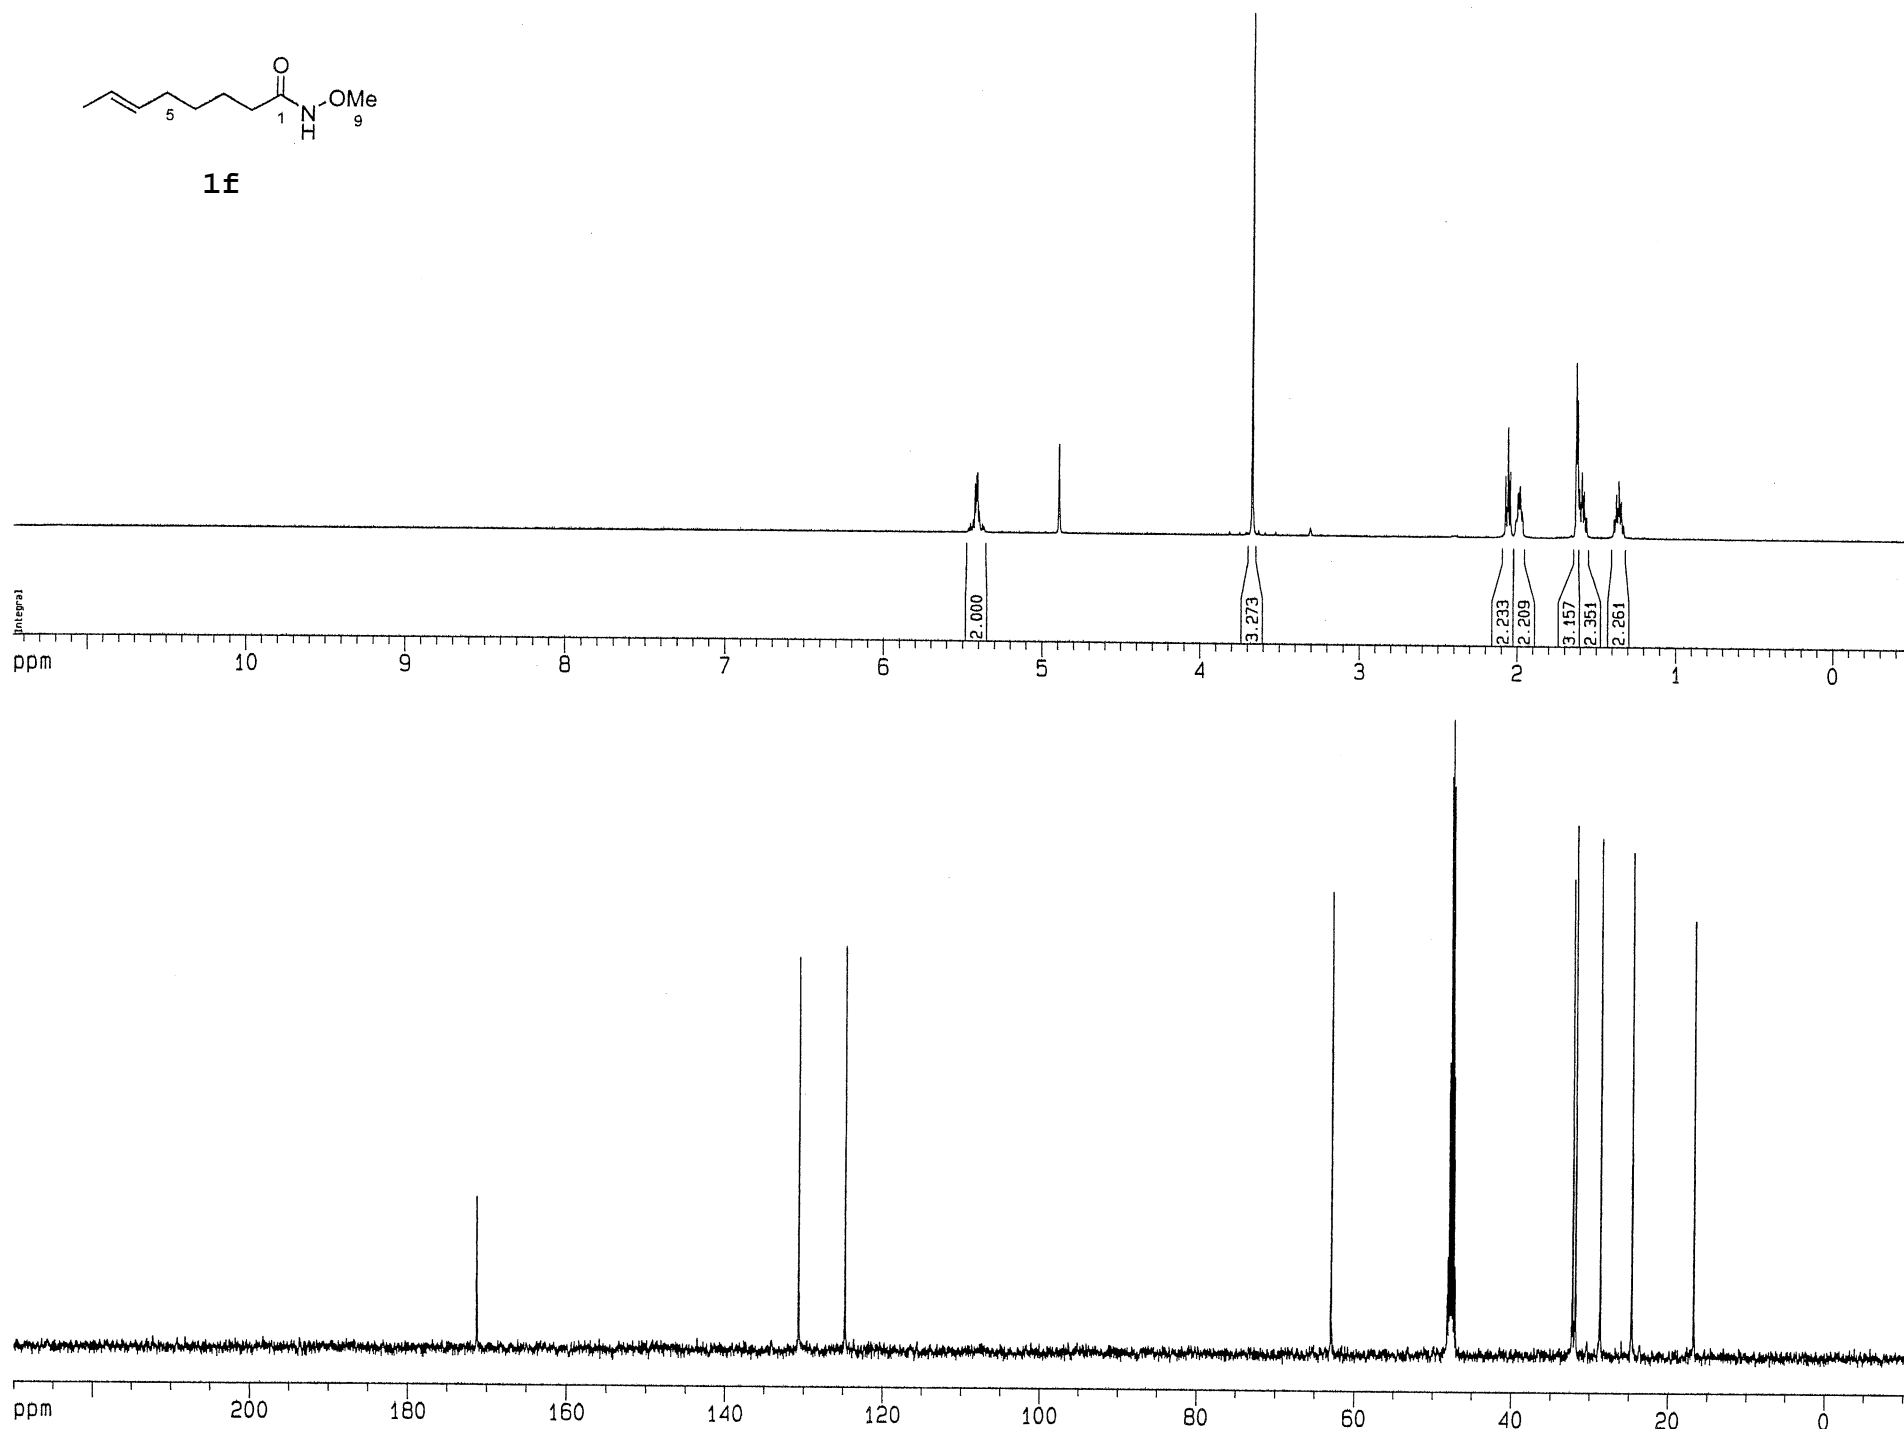

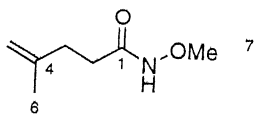

1g

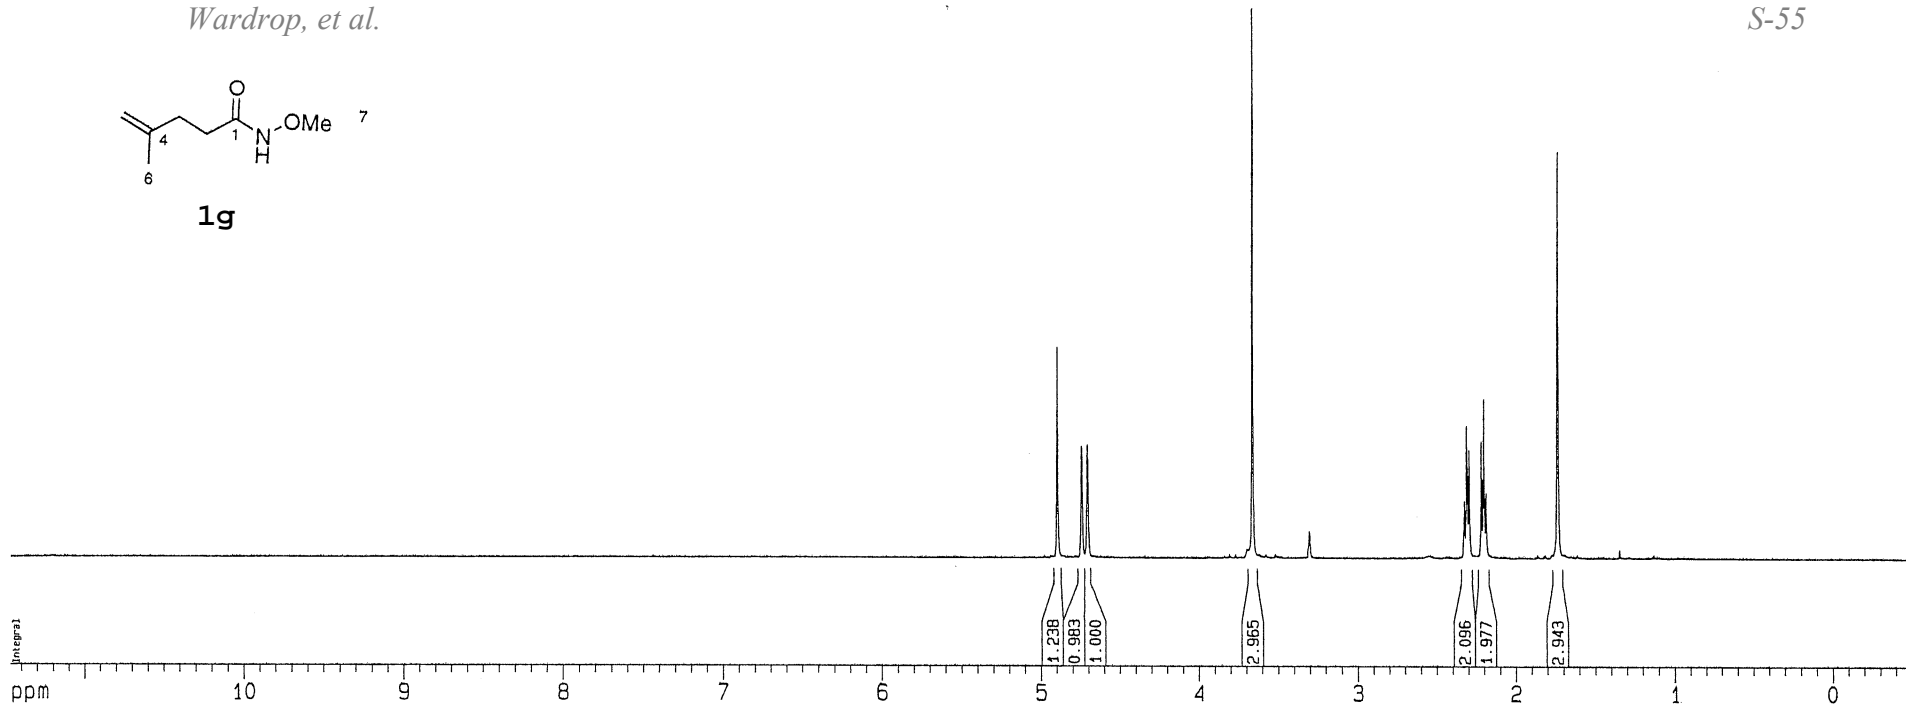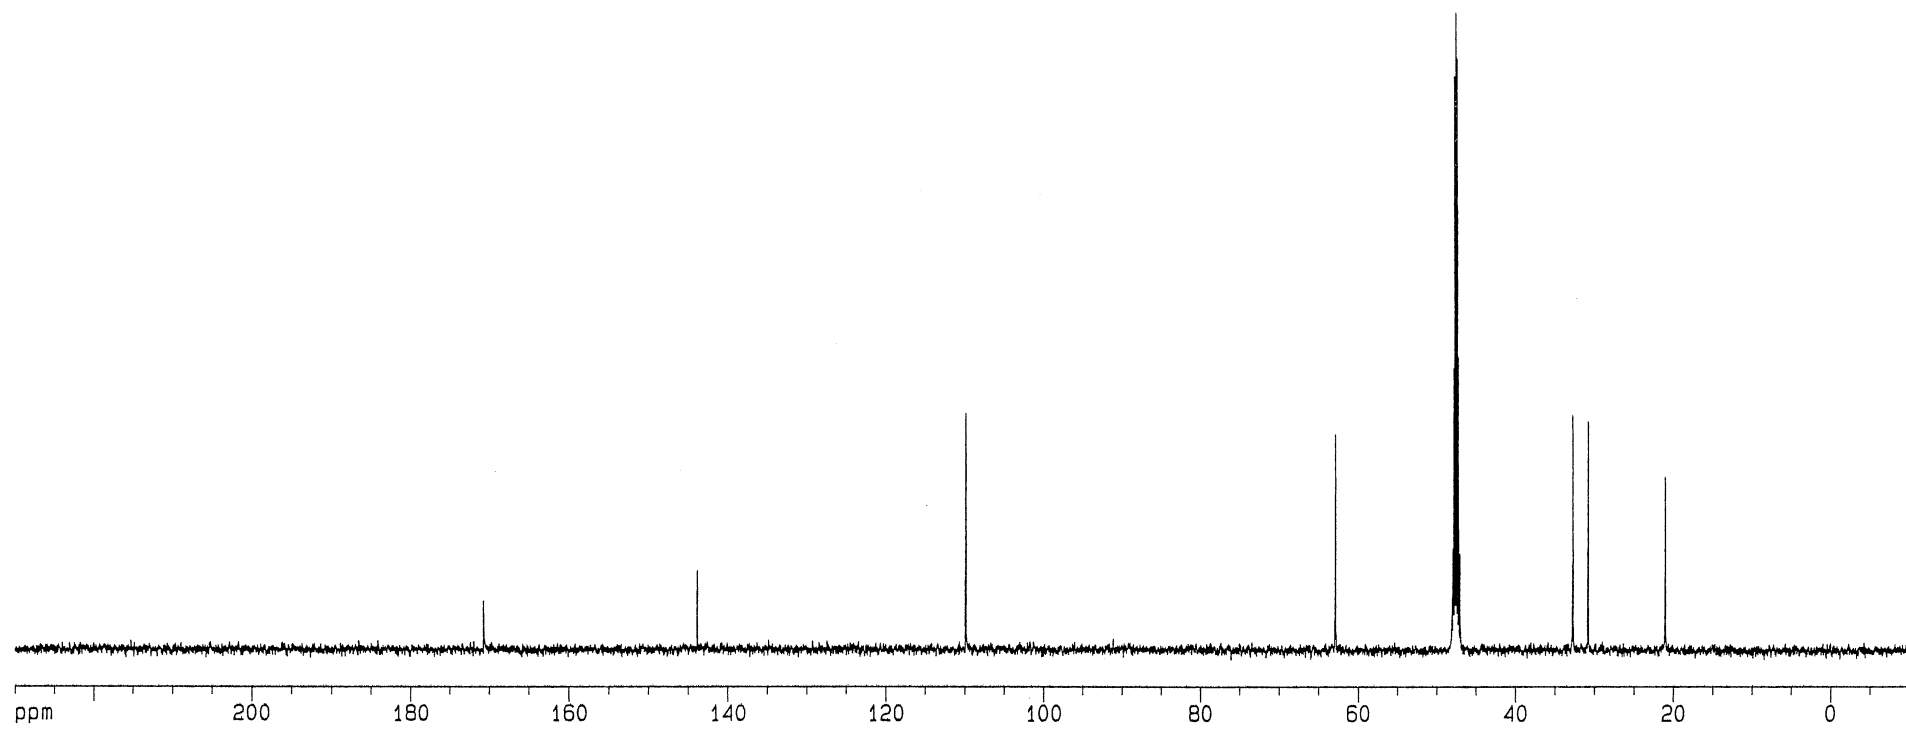



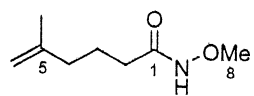**1h**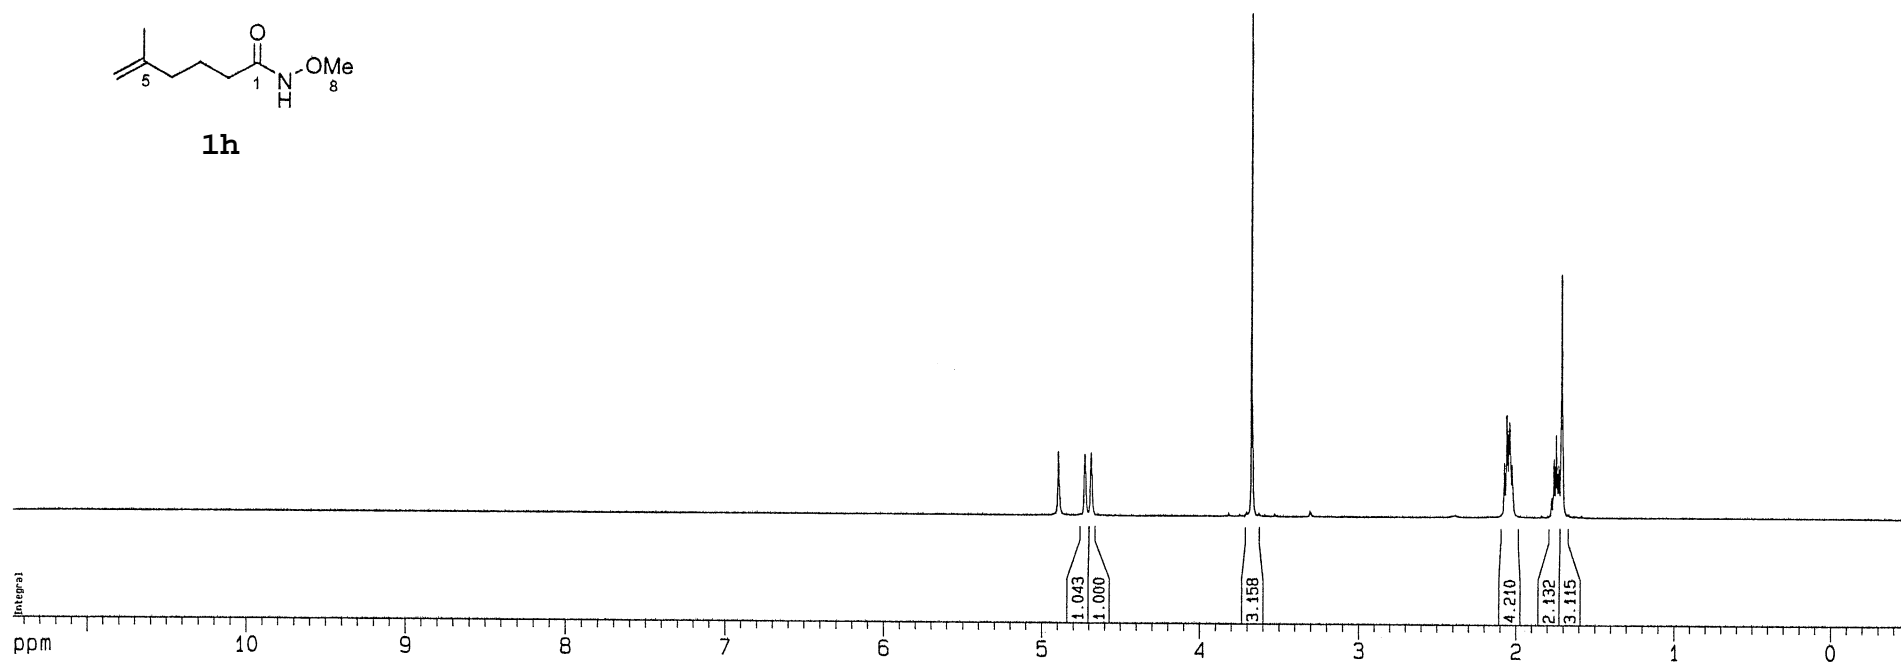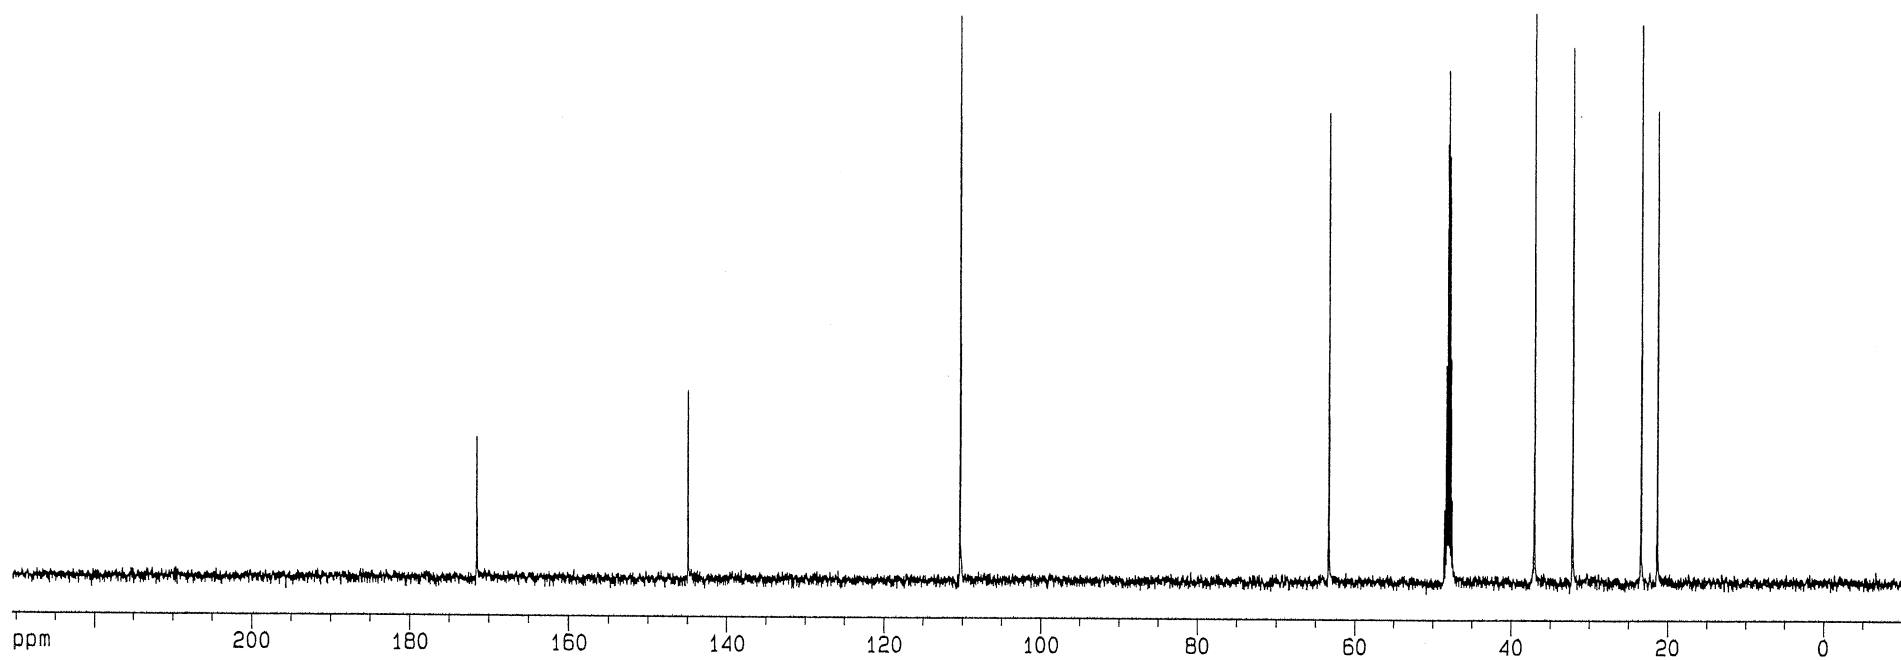

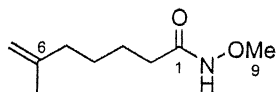**1i**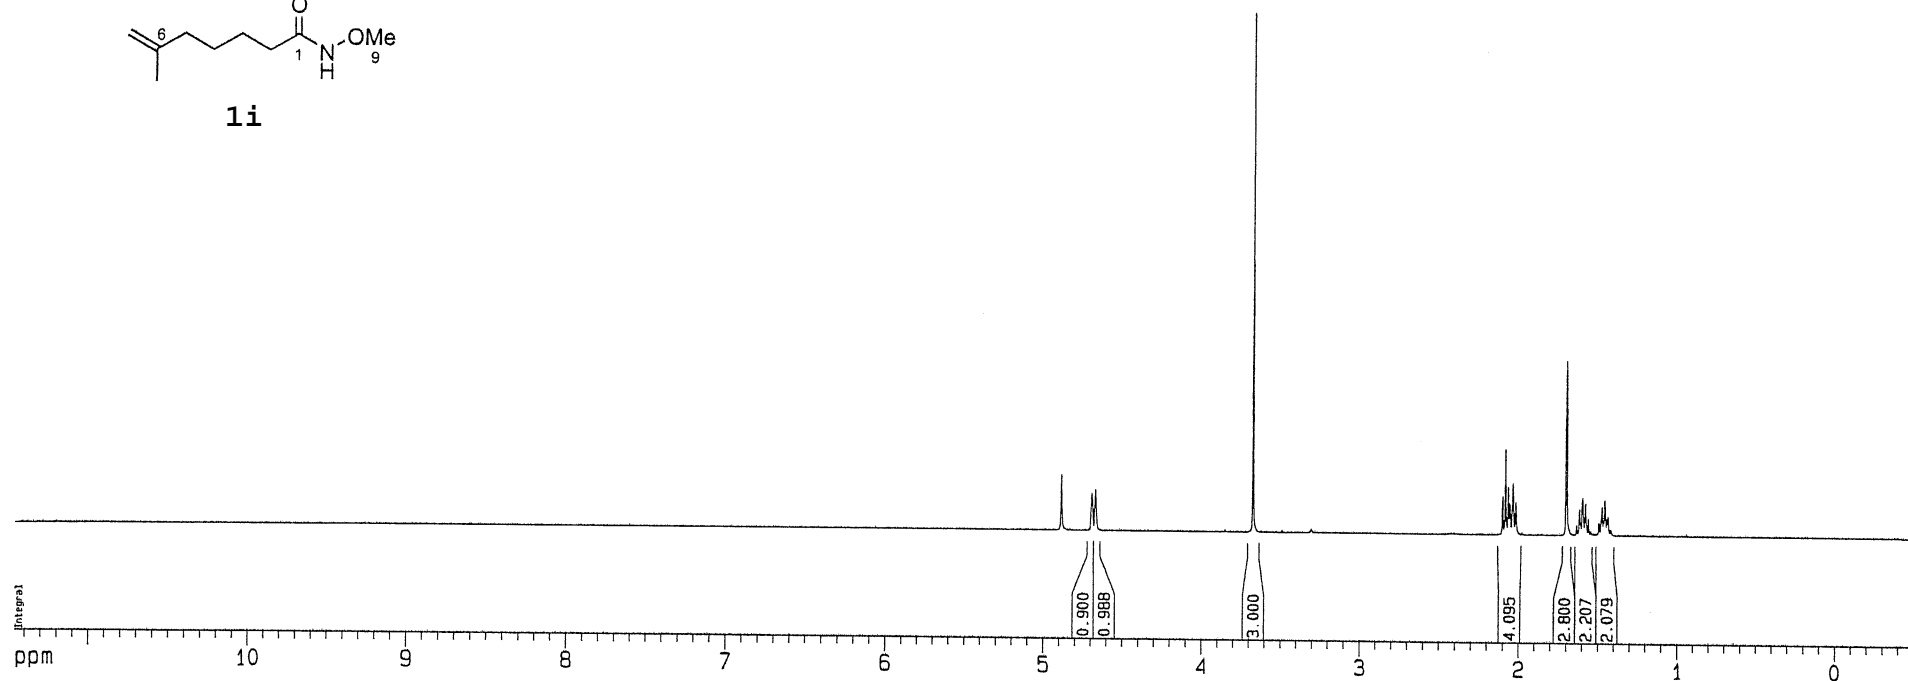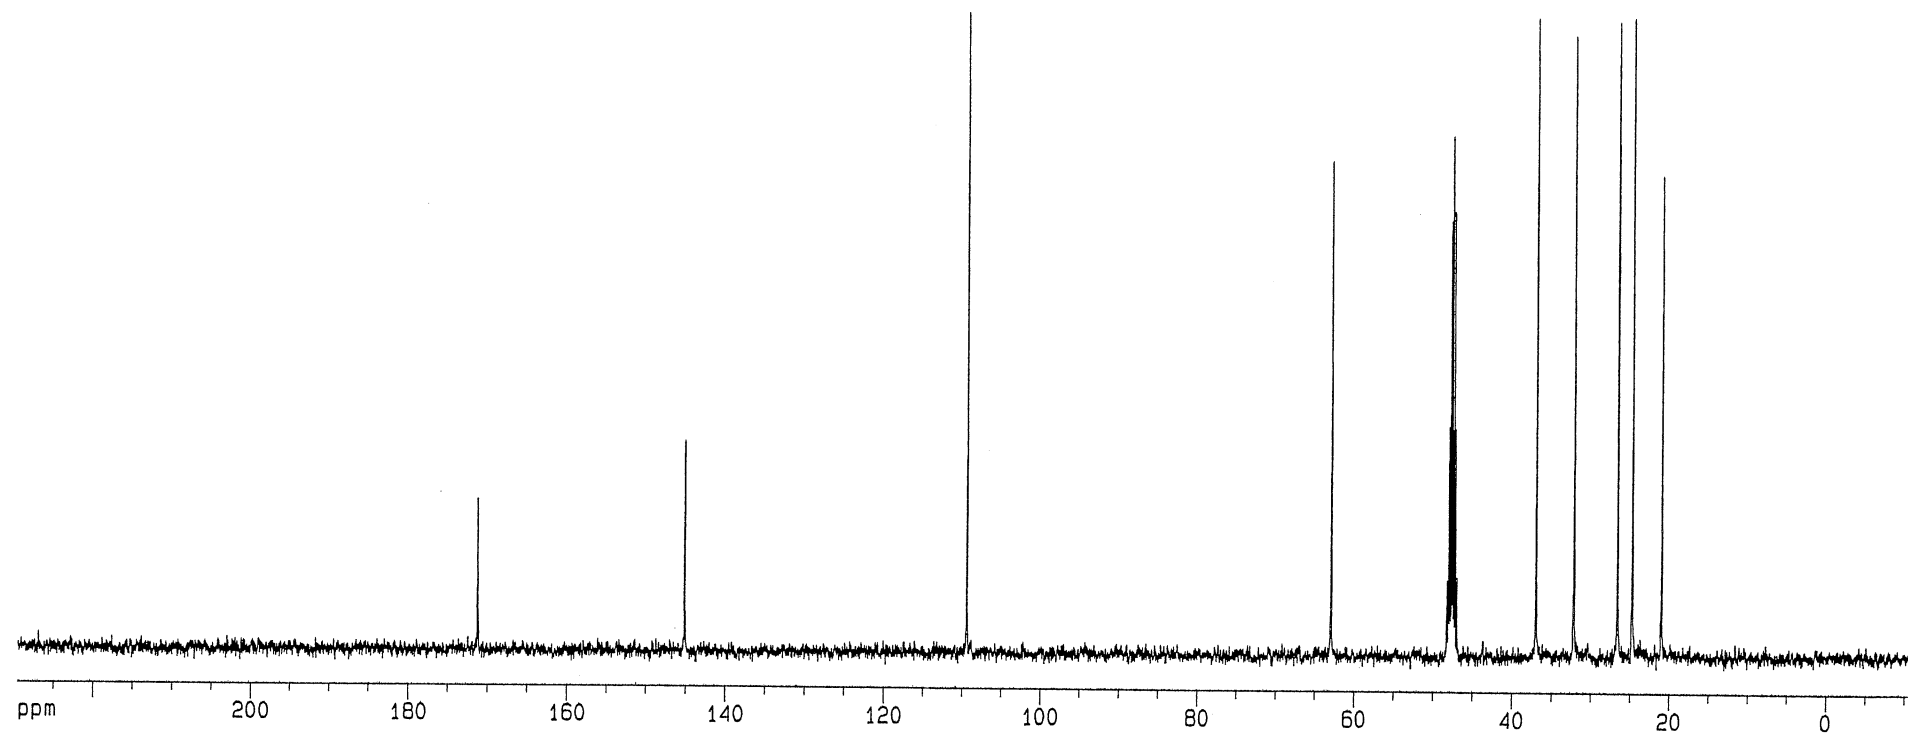

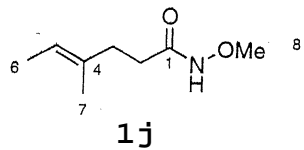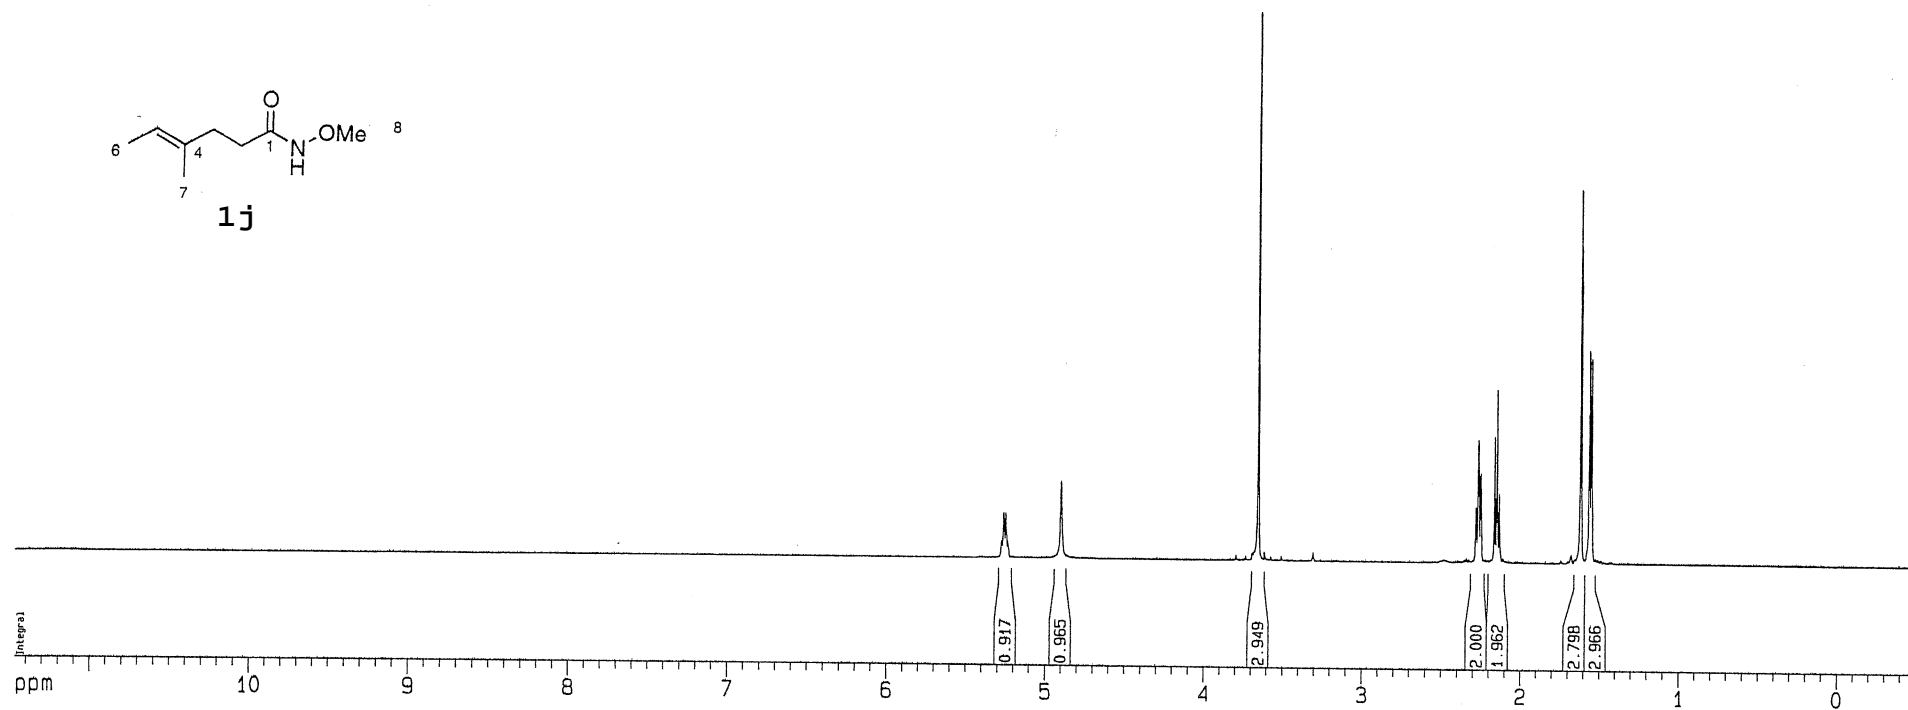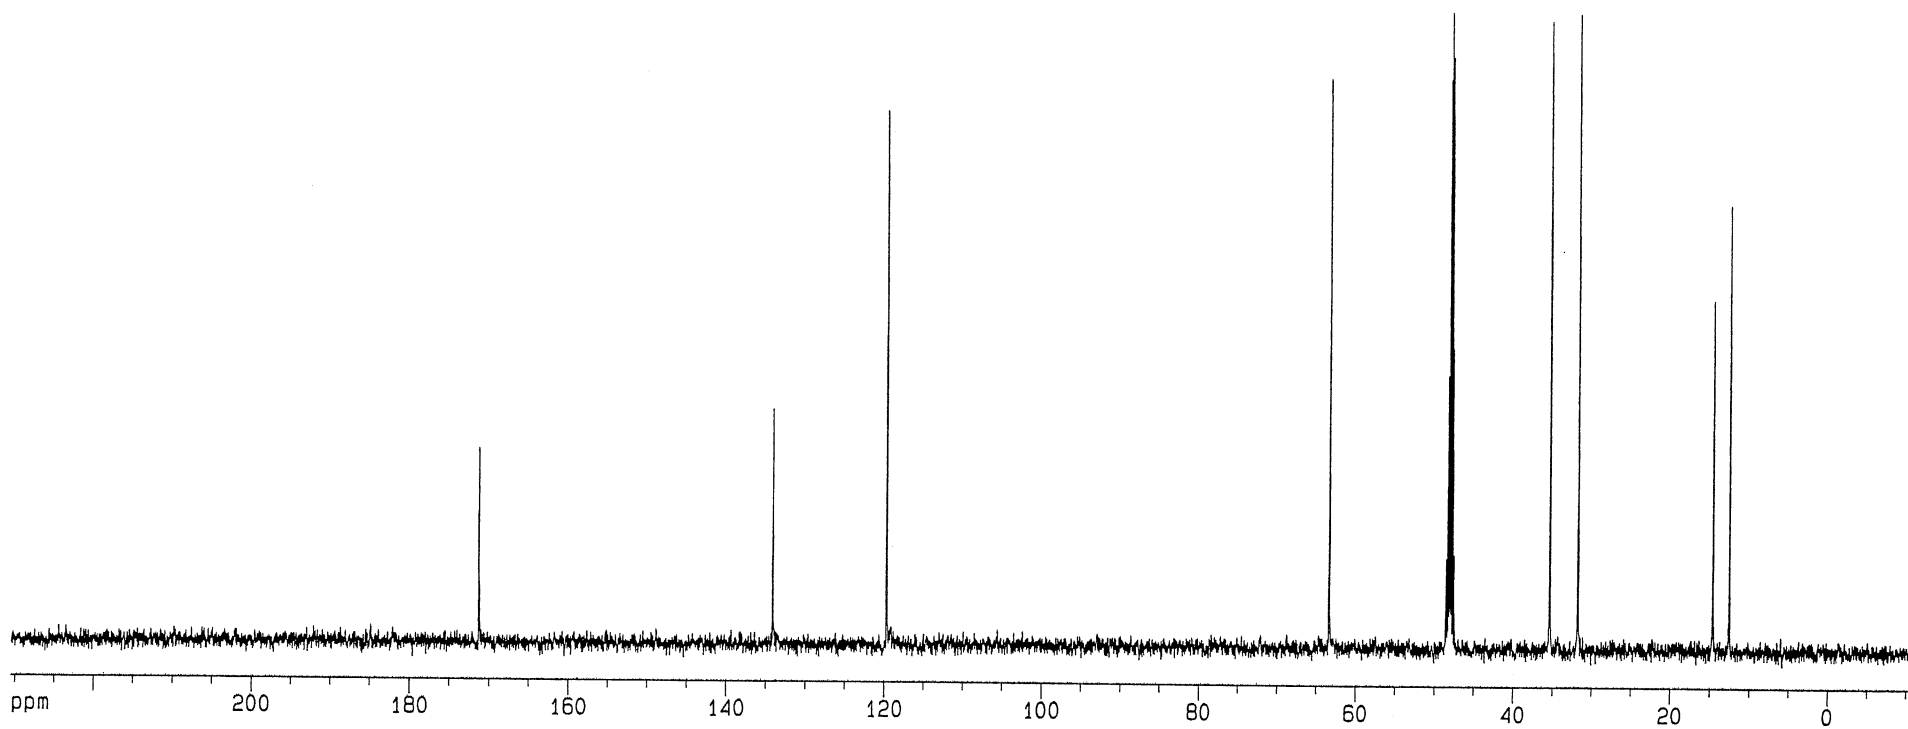

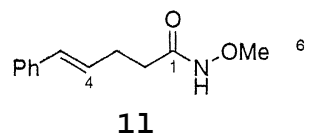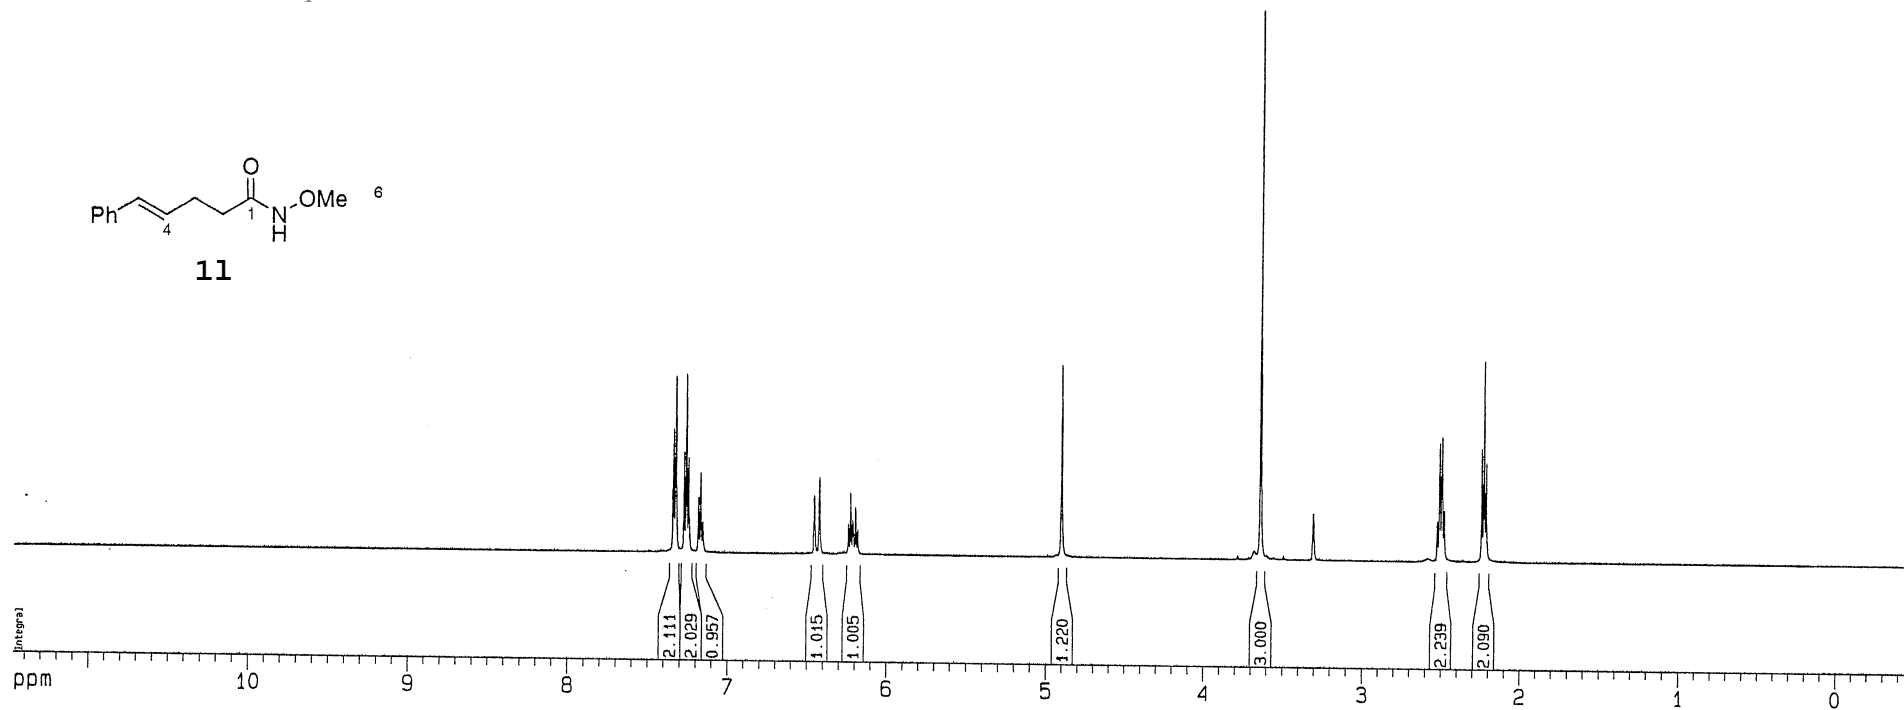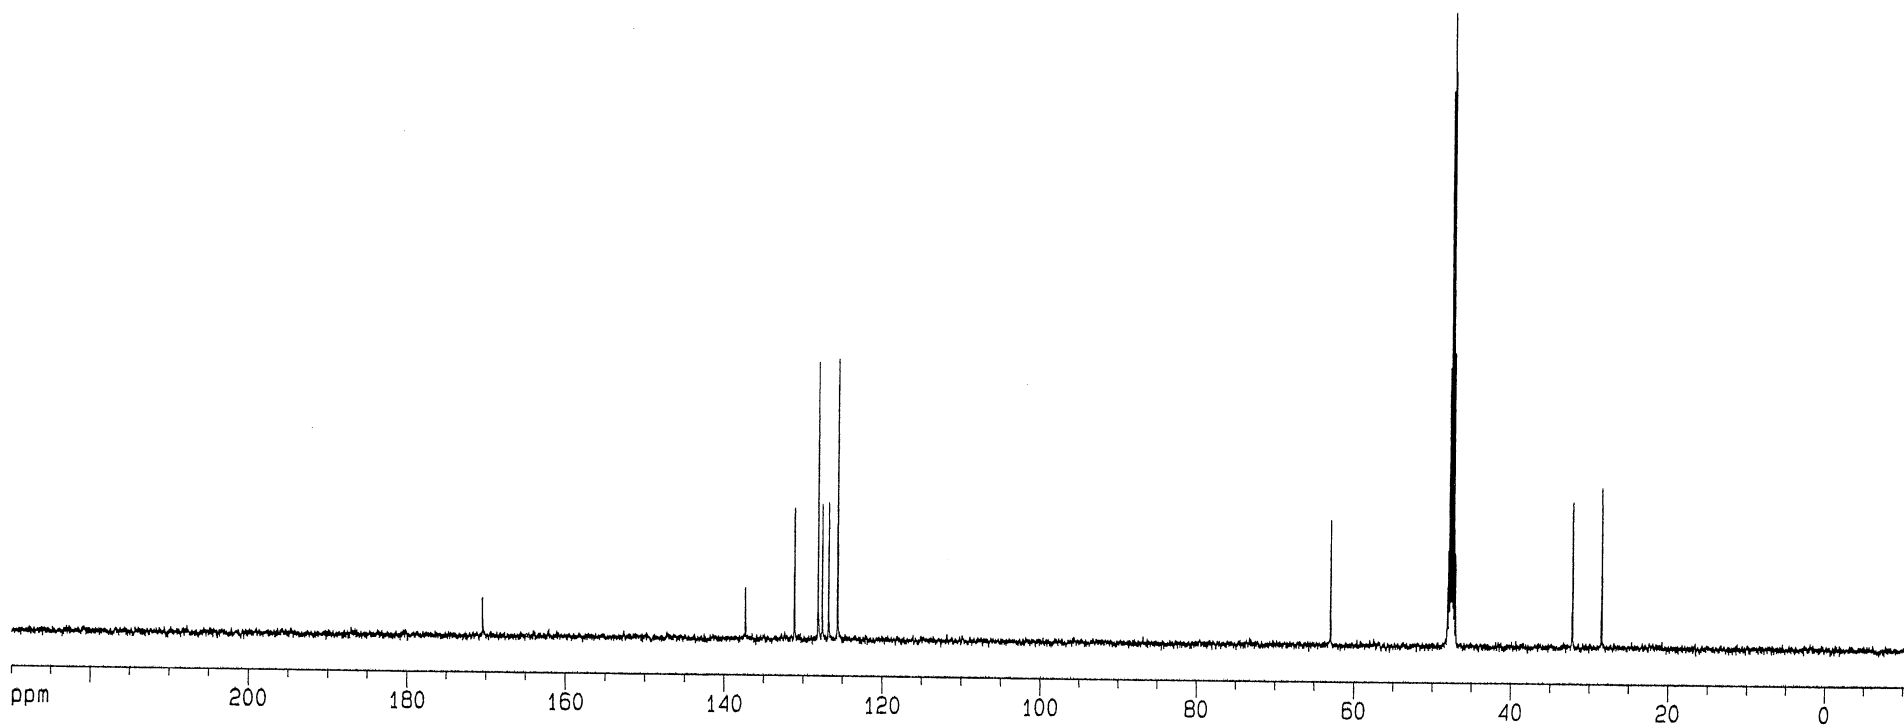

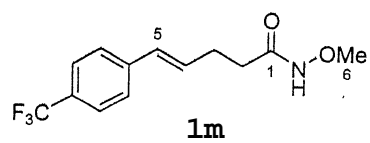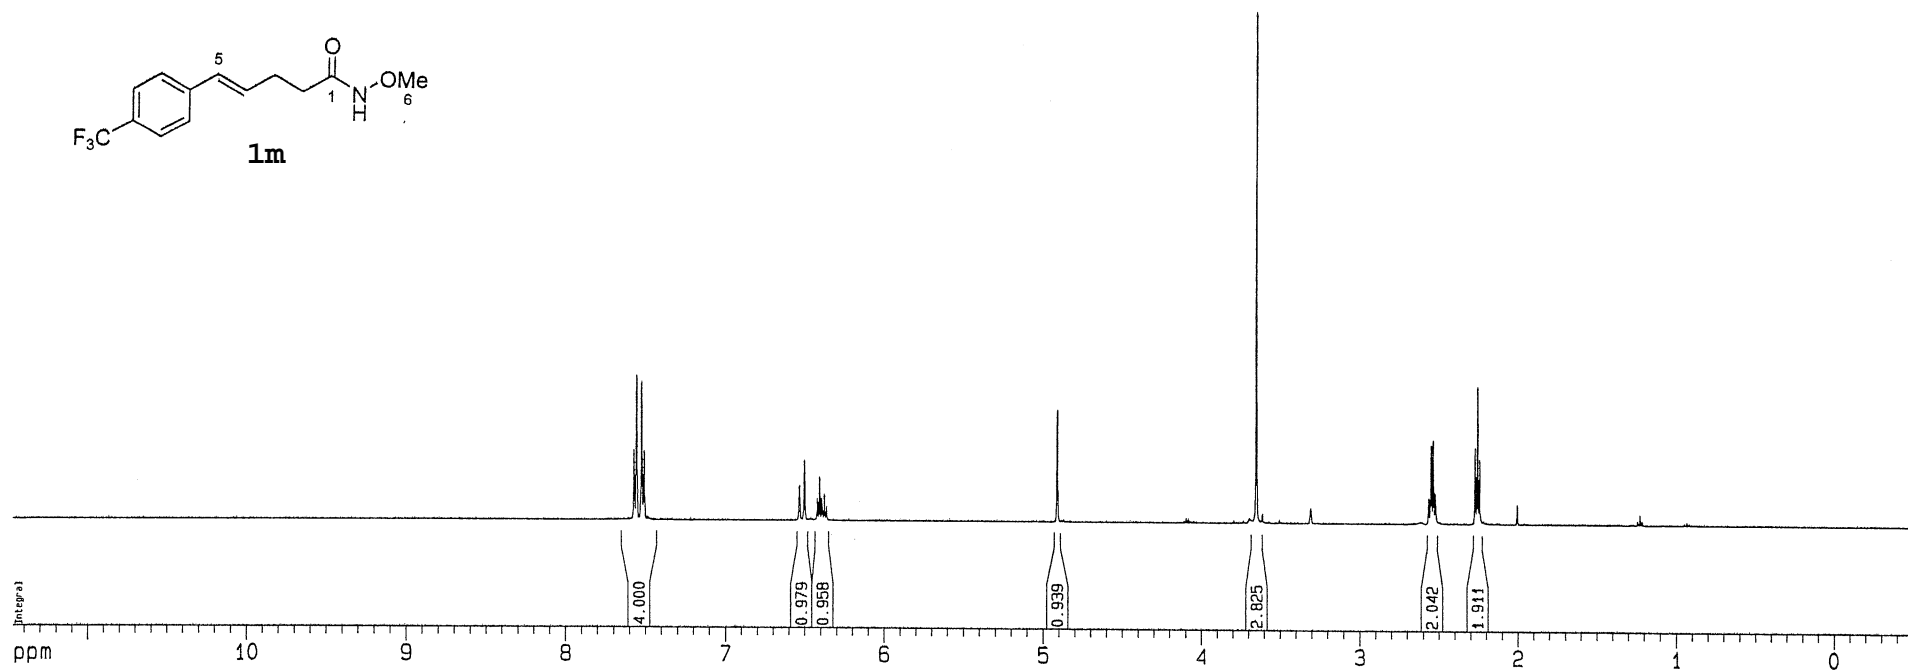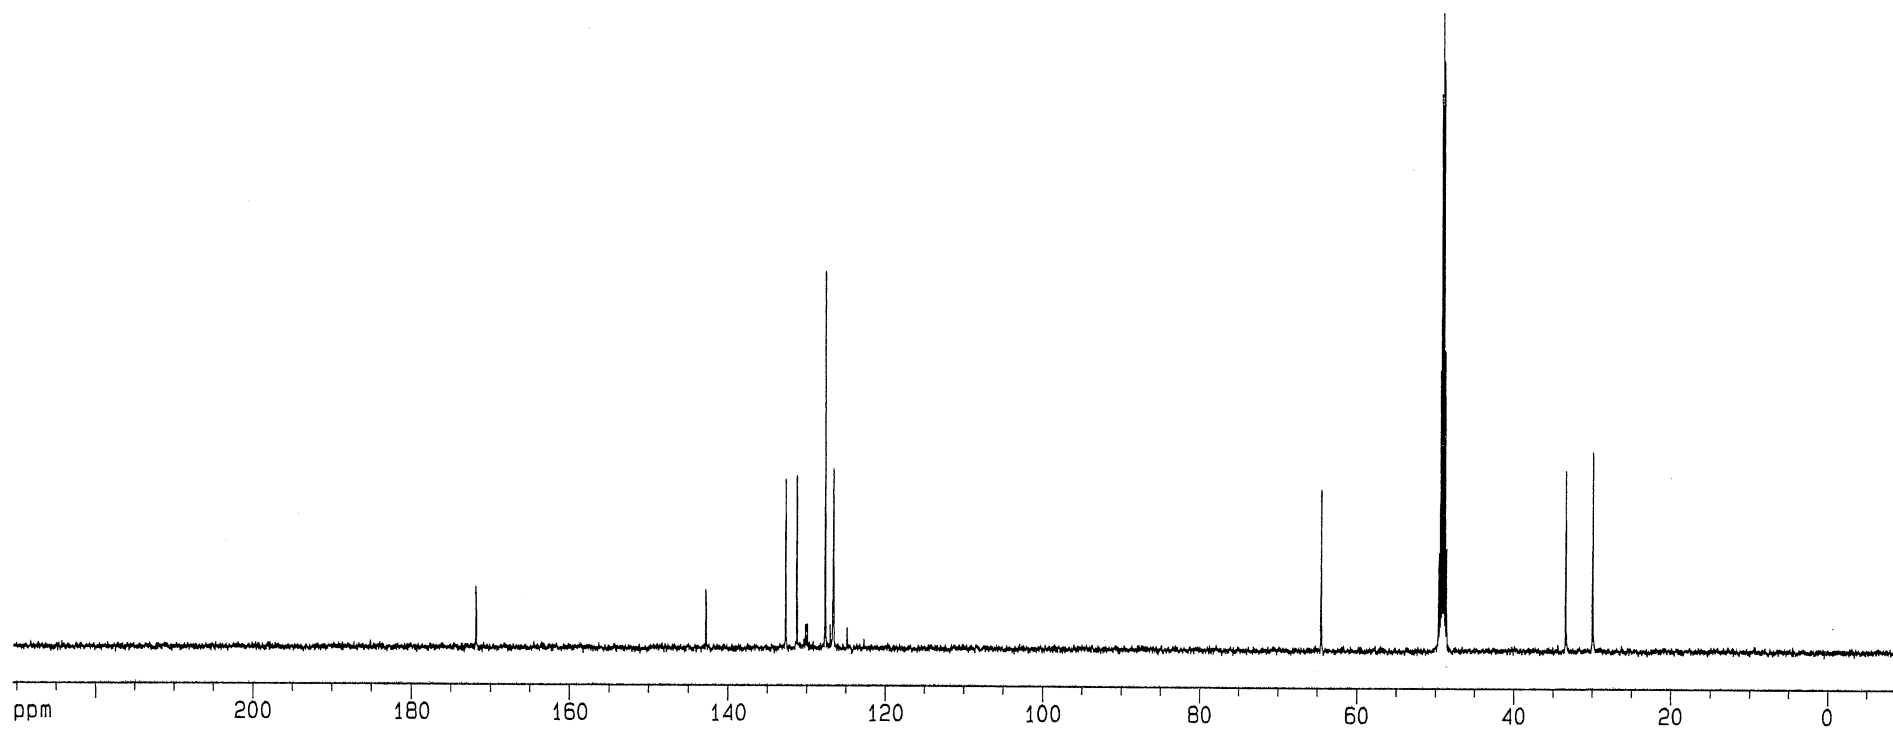

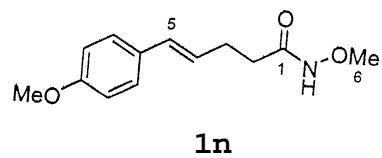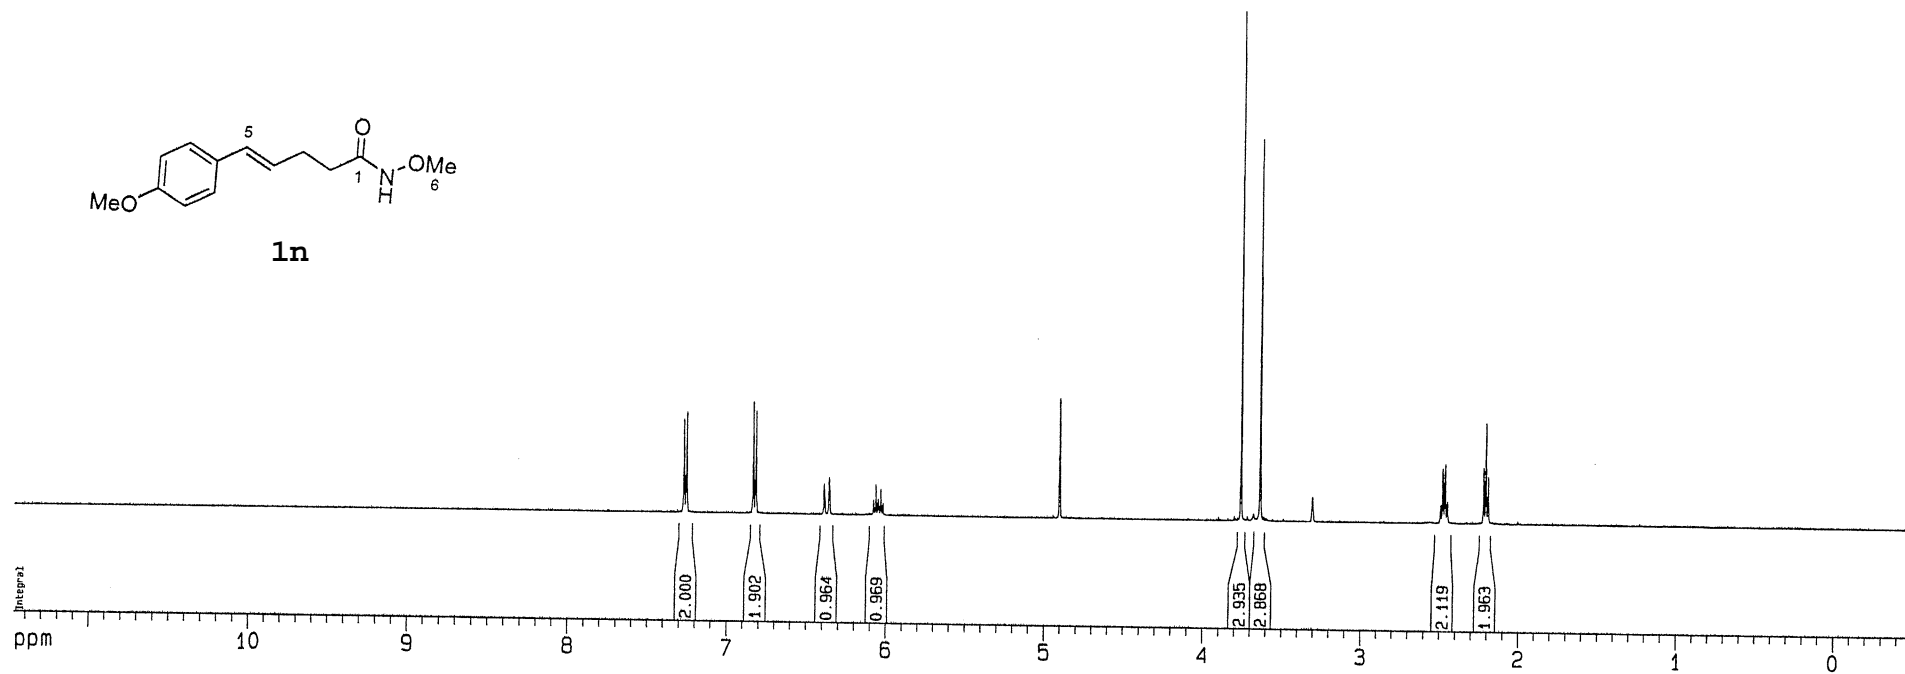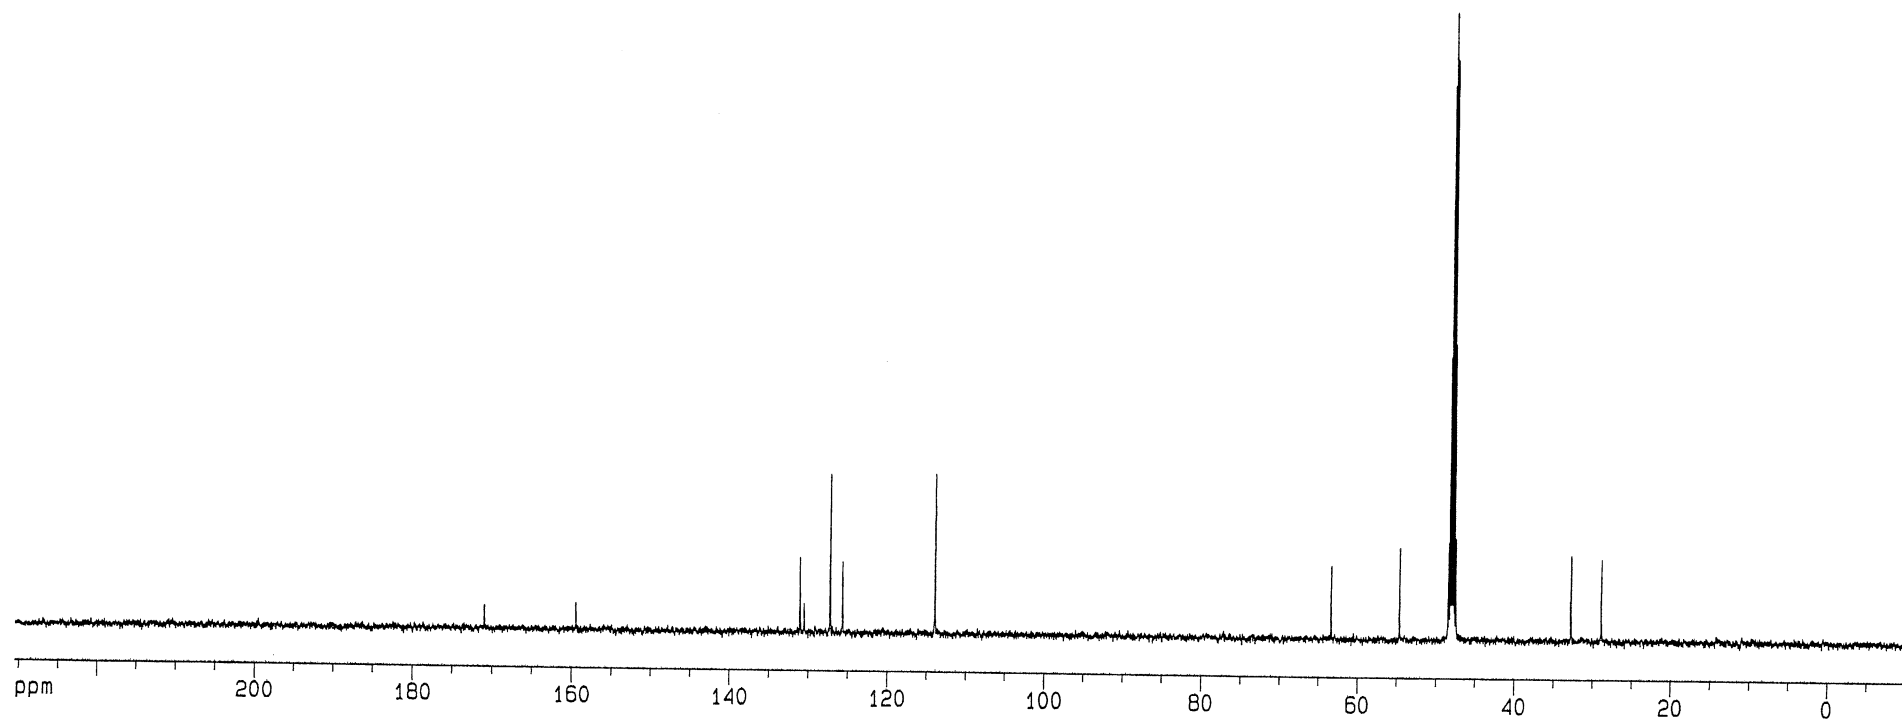

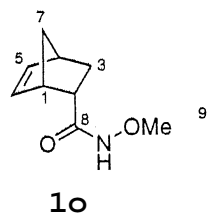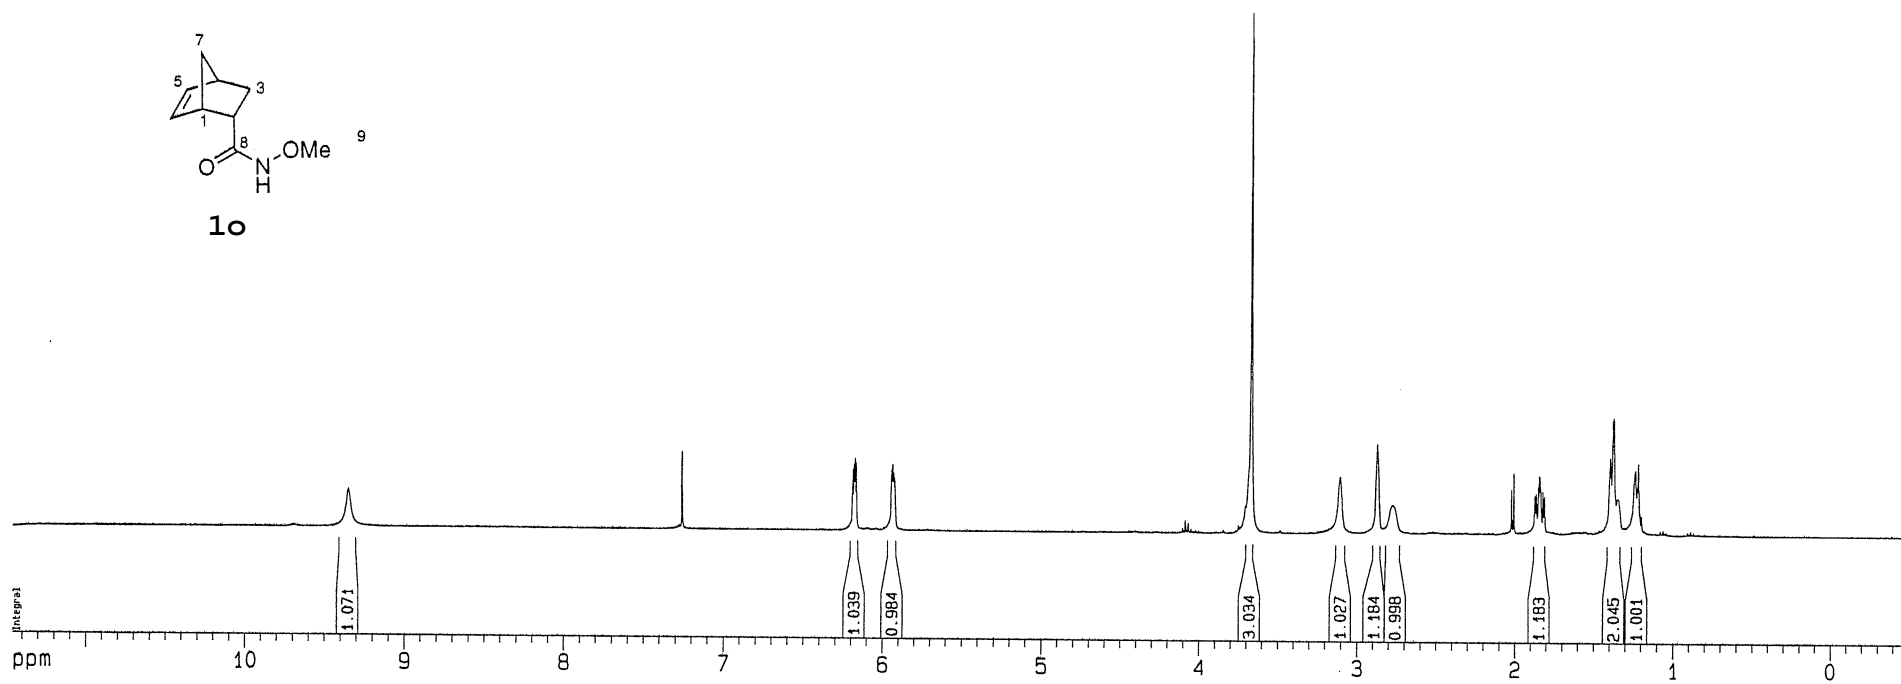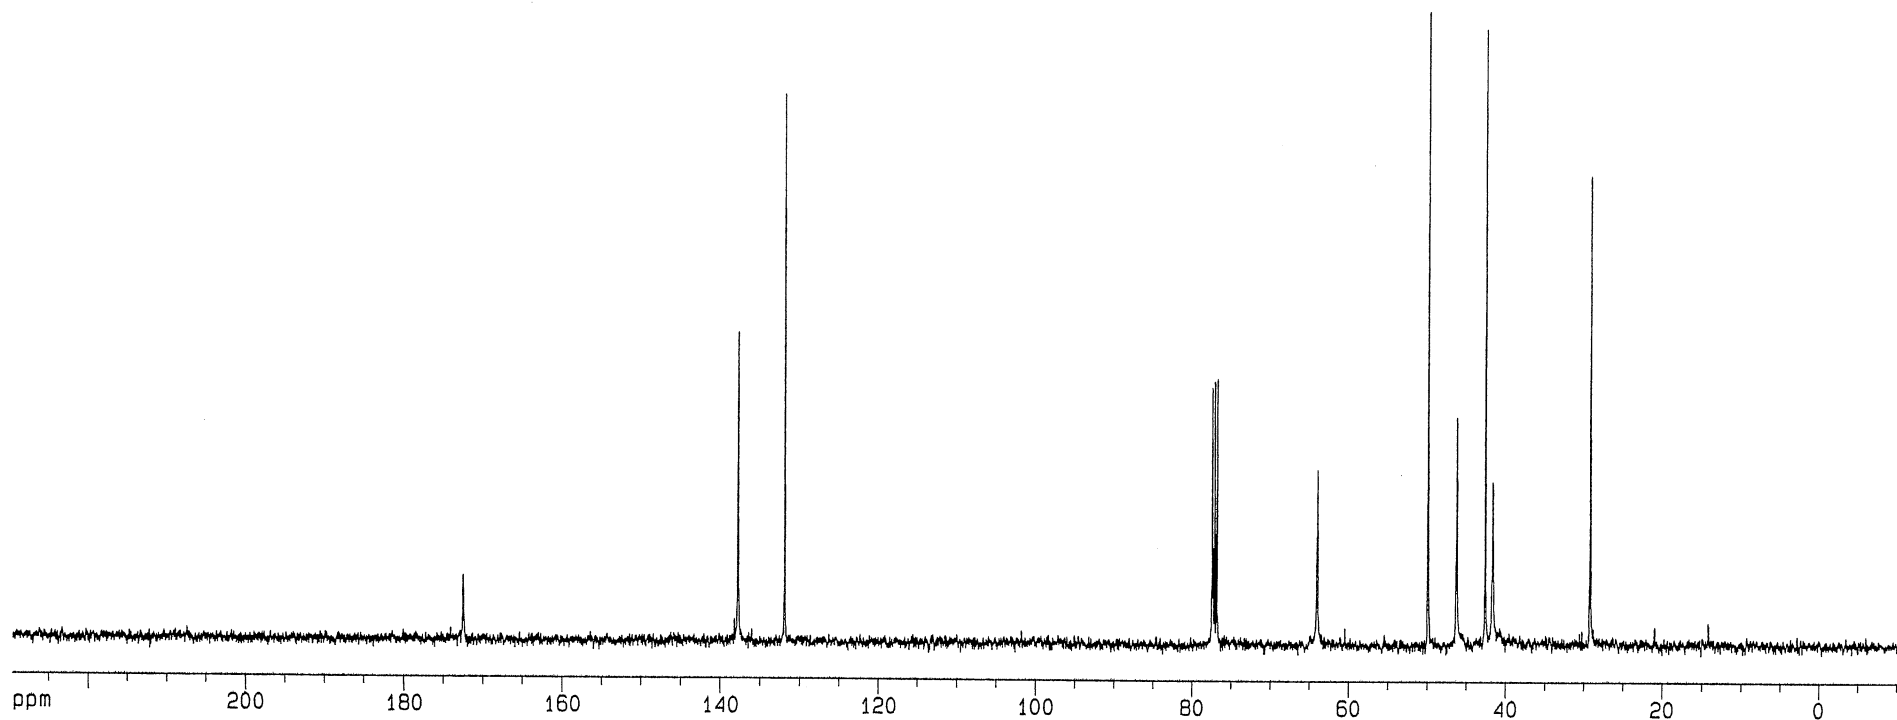

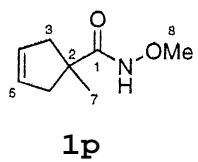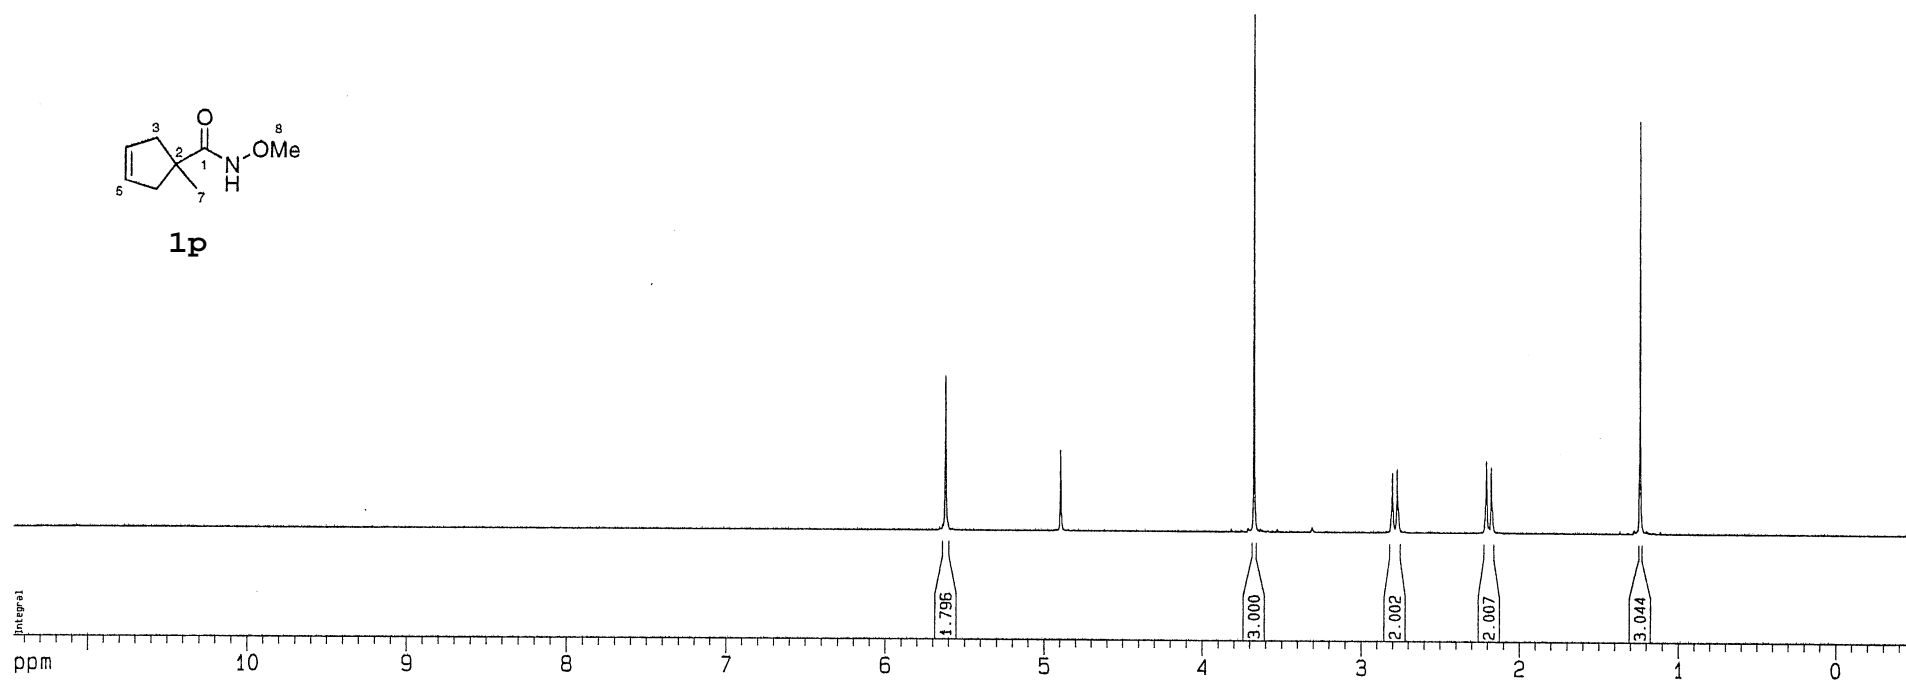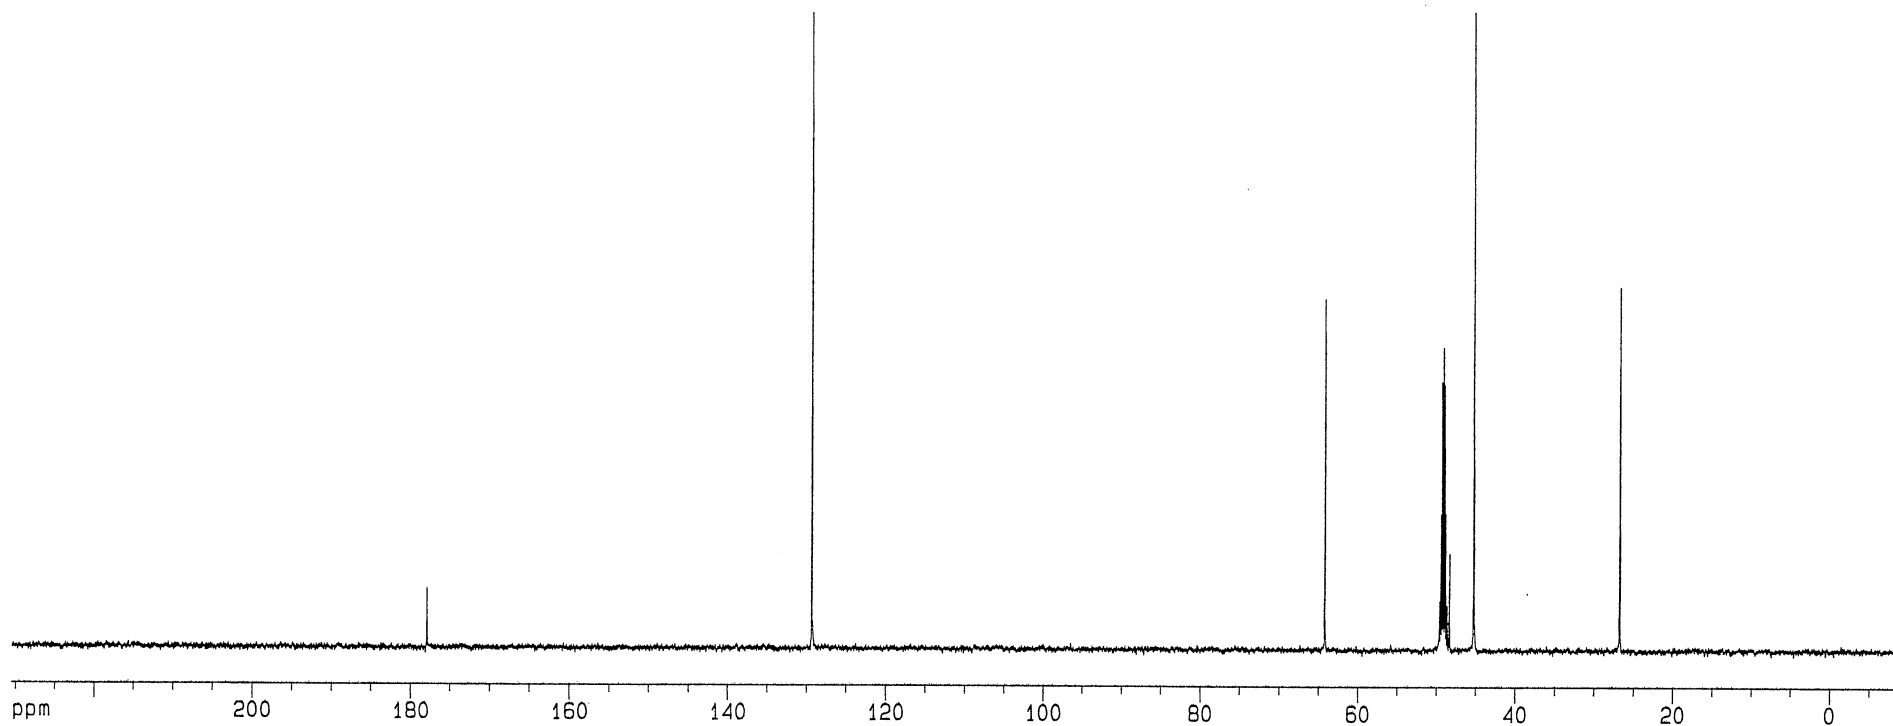



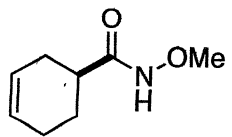

1q

Wardrop, et al.

S-64

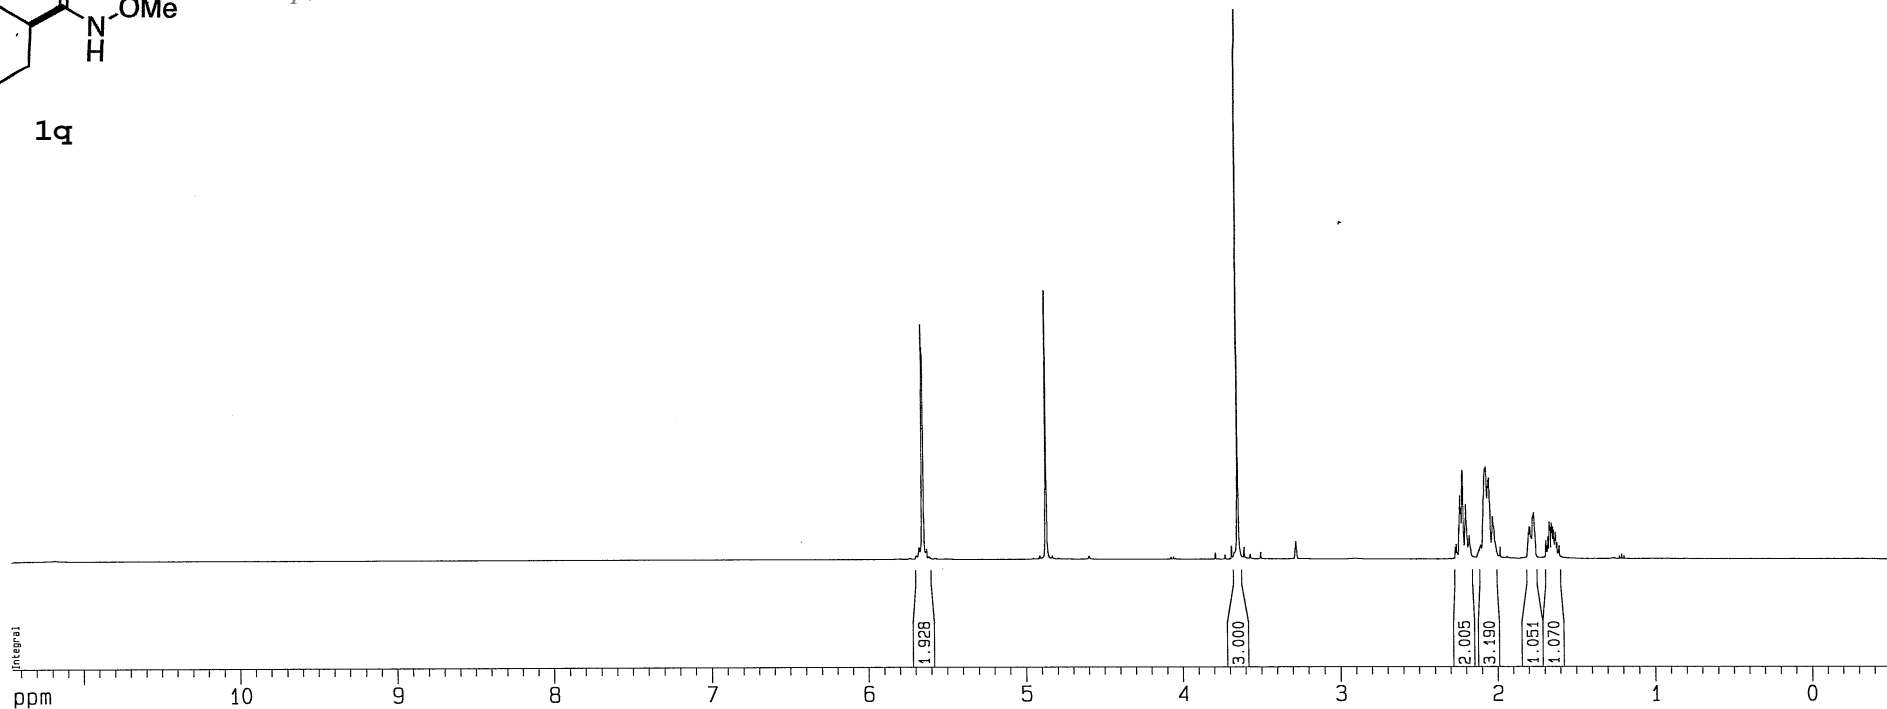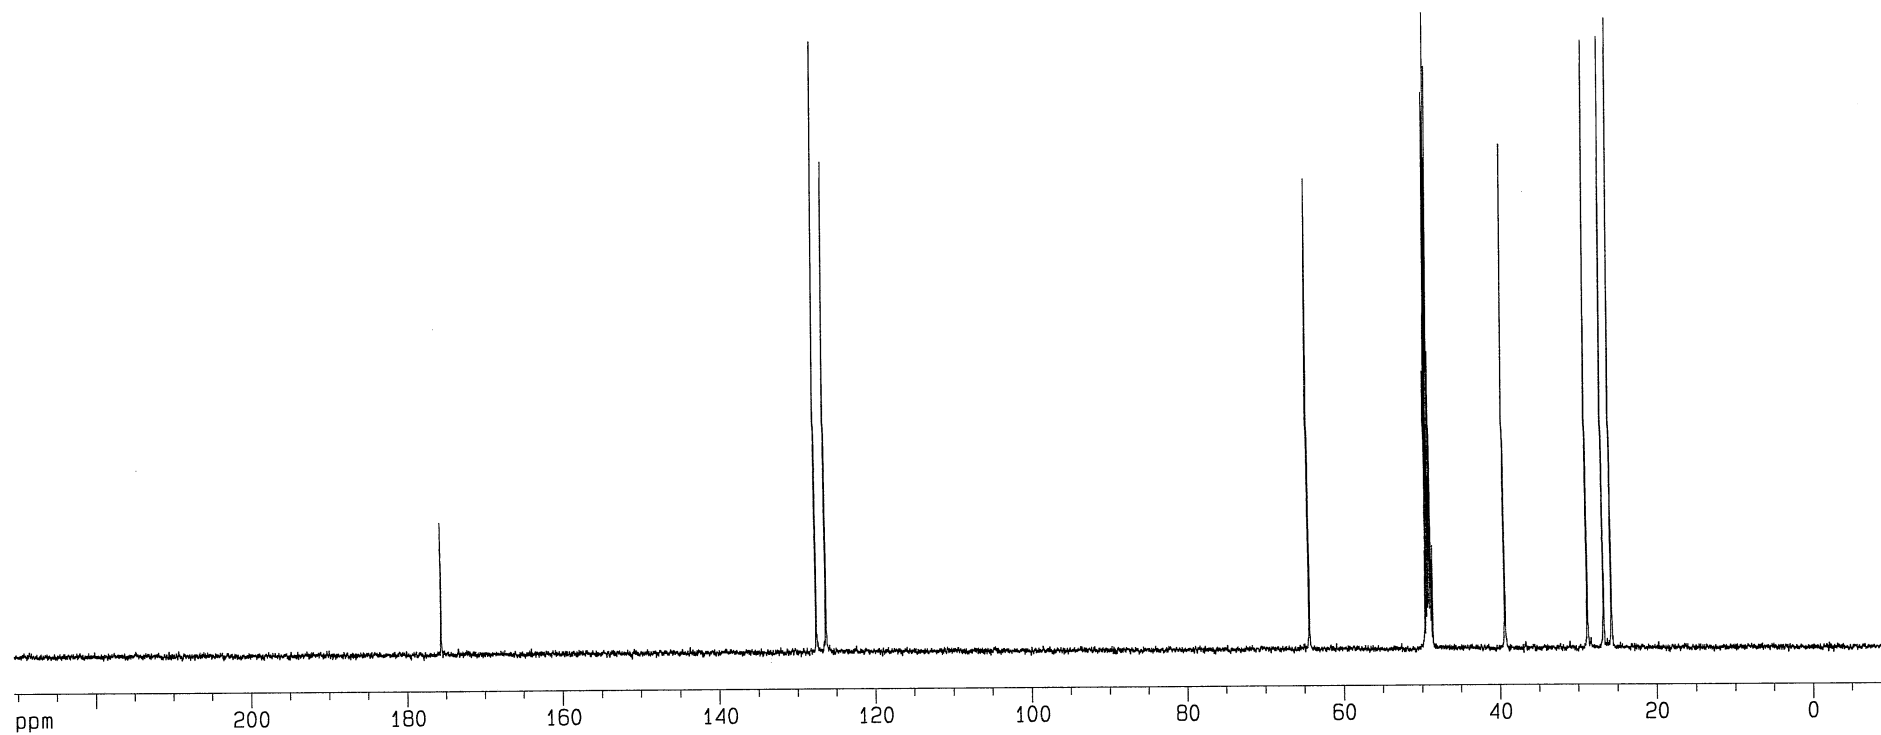

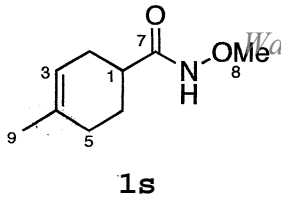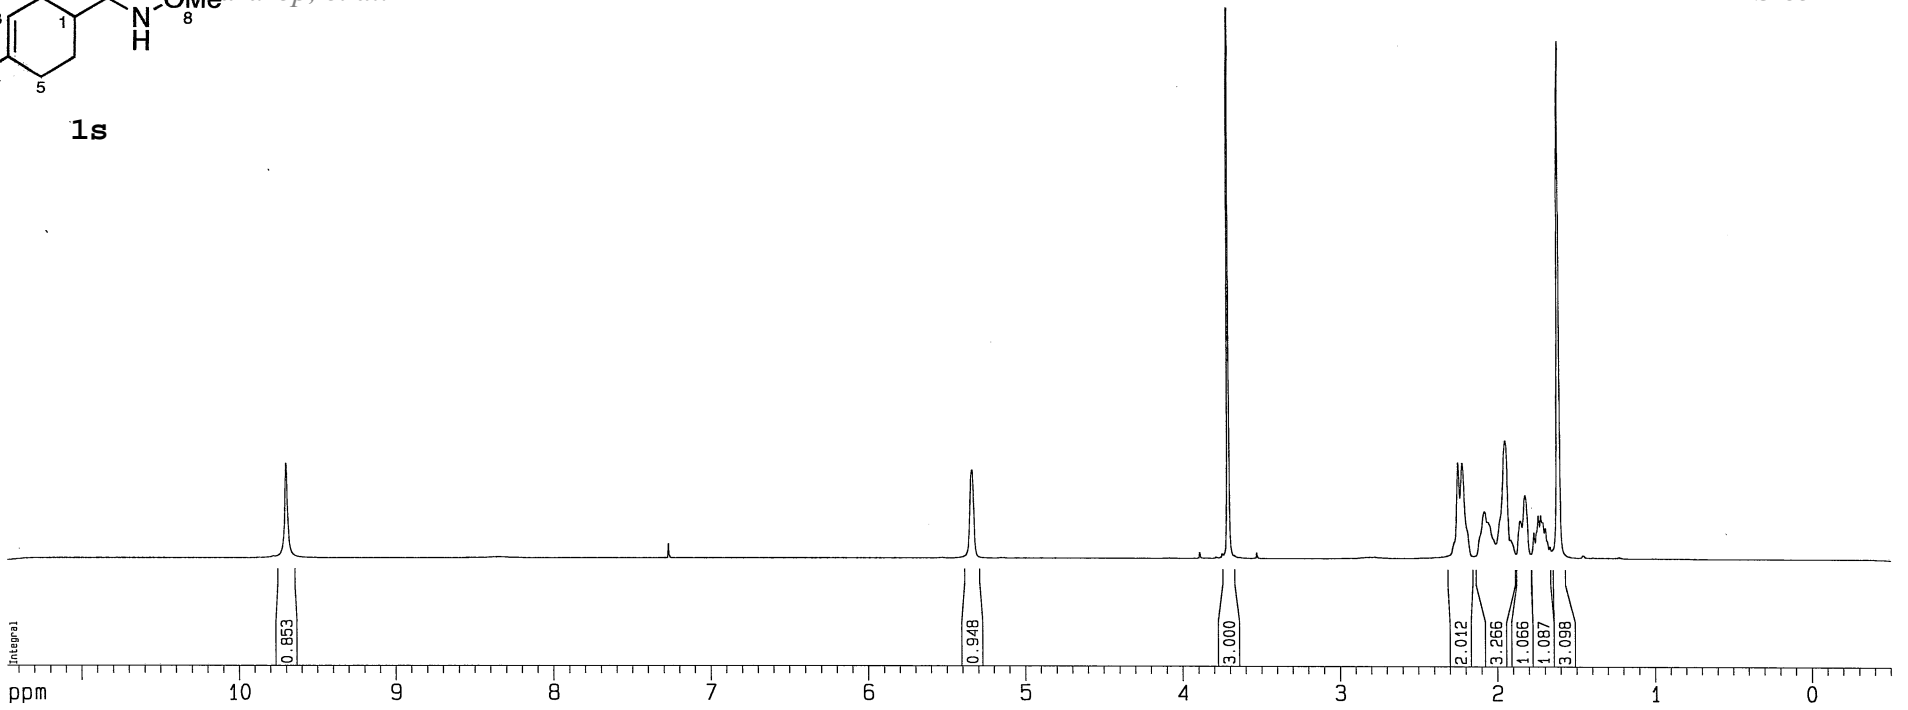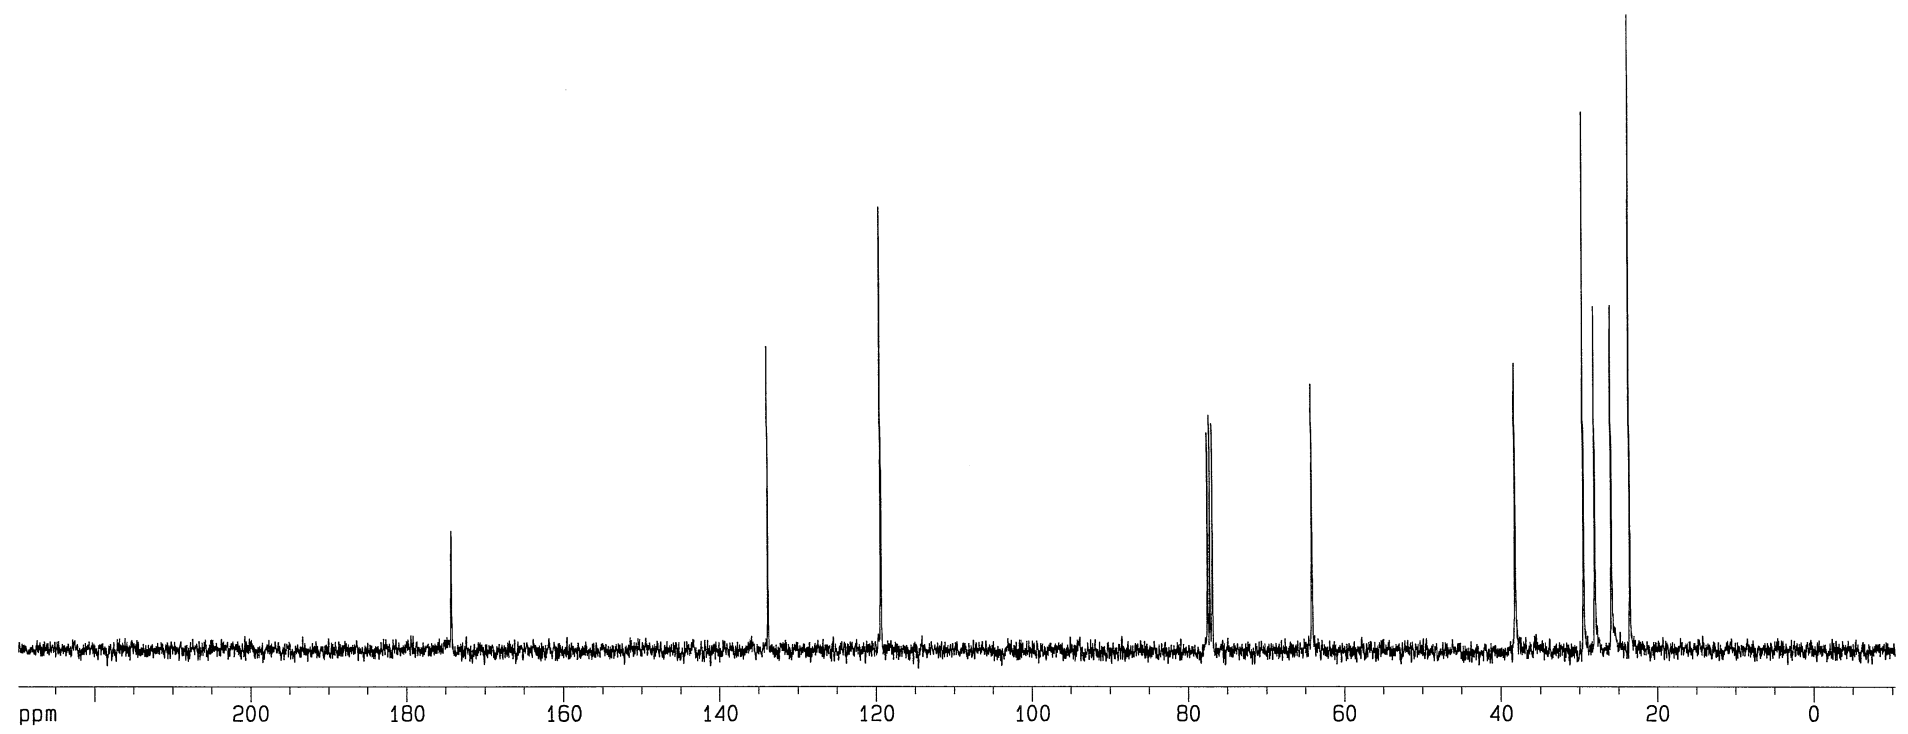

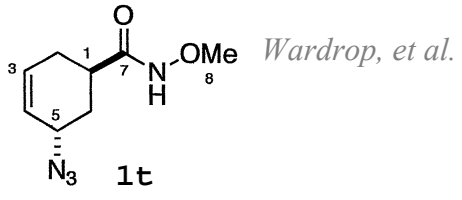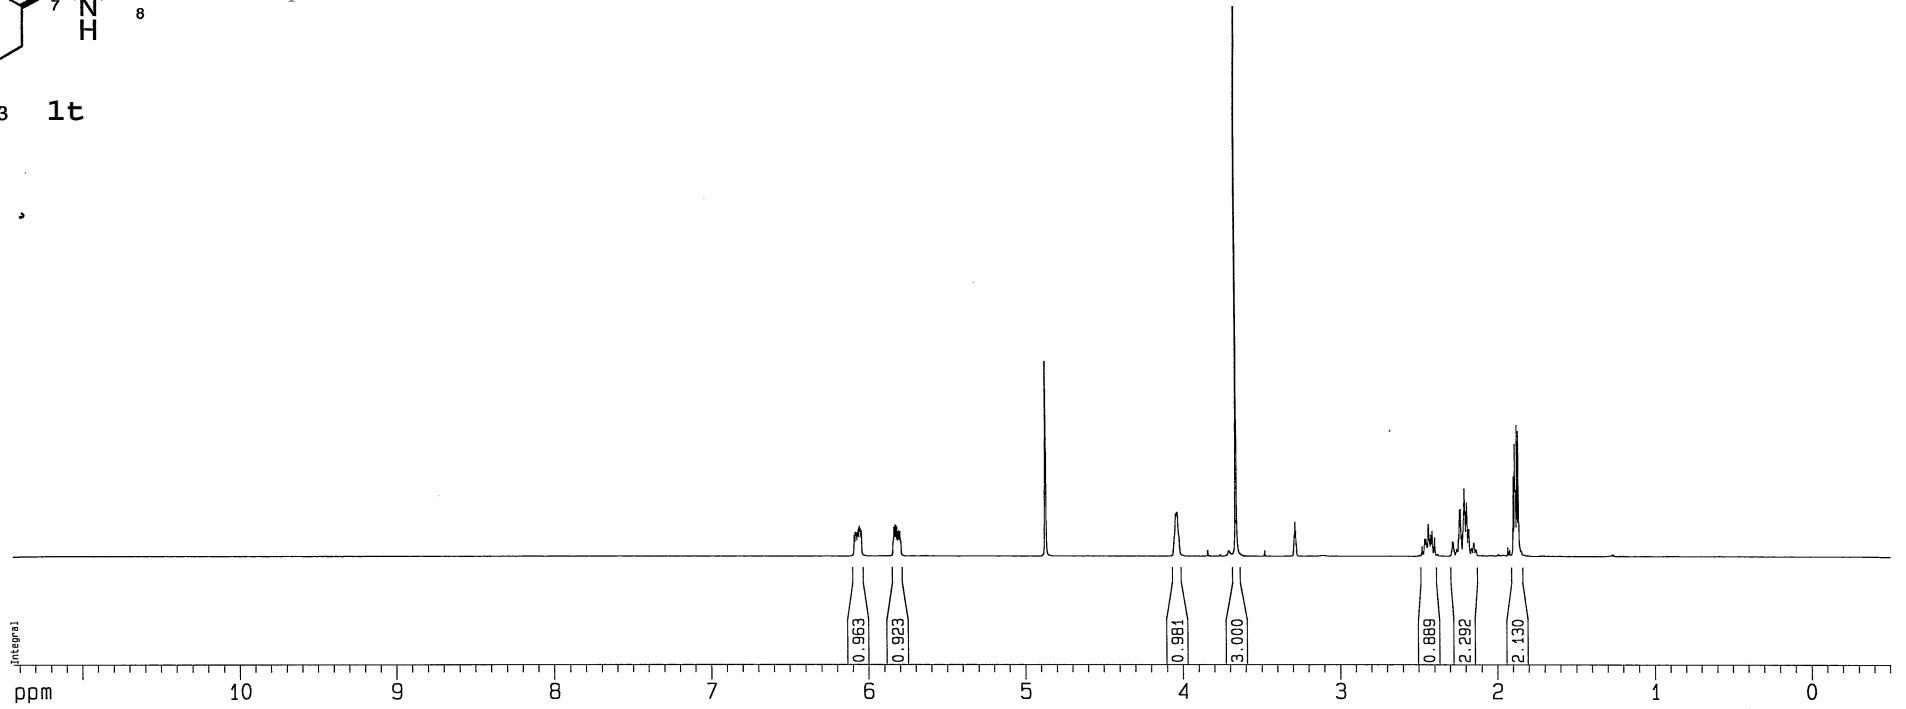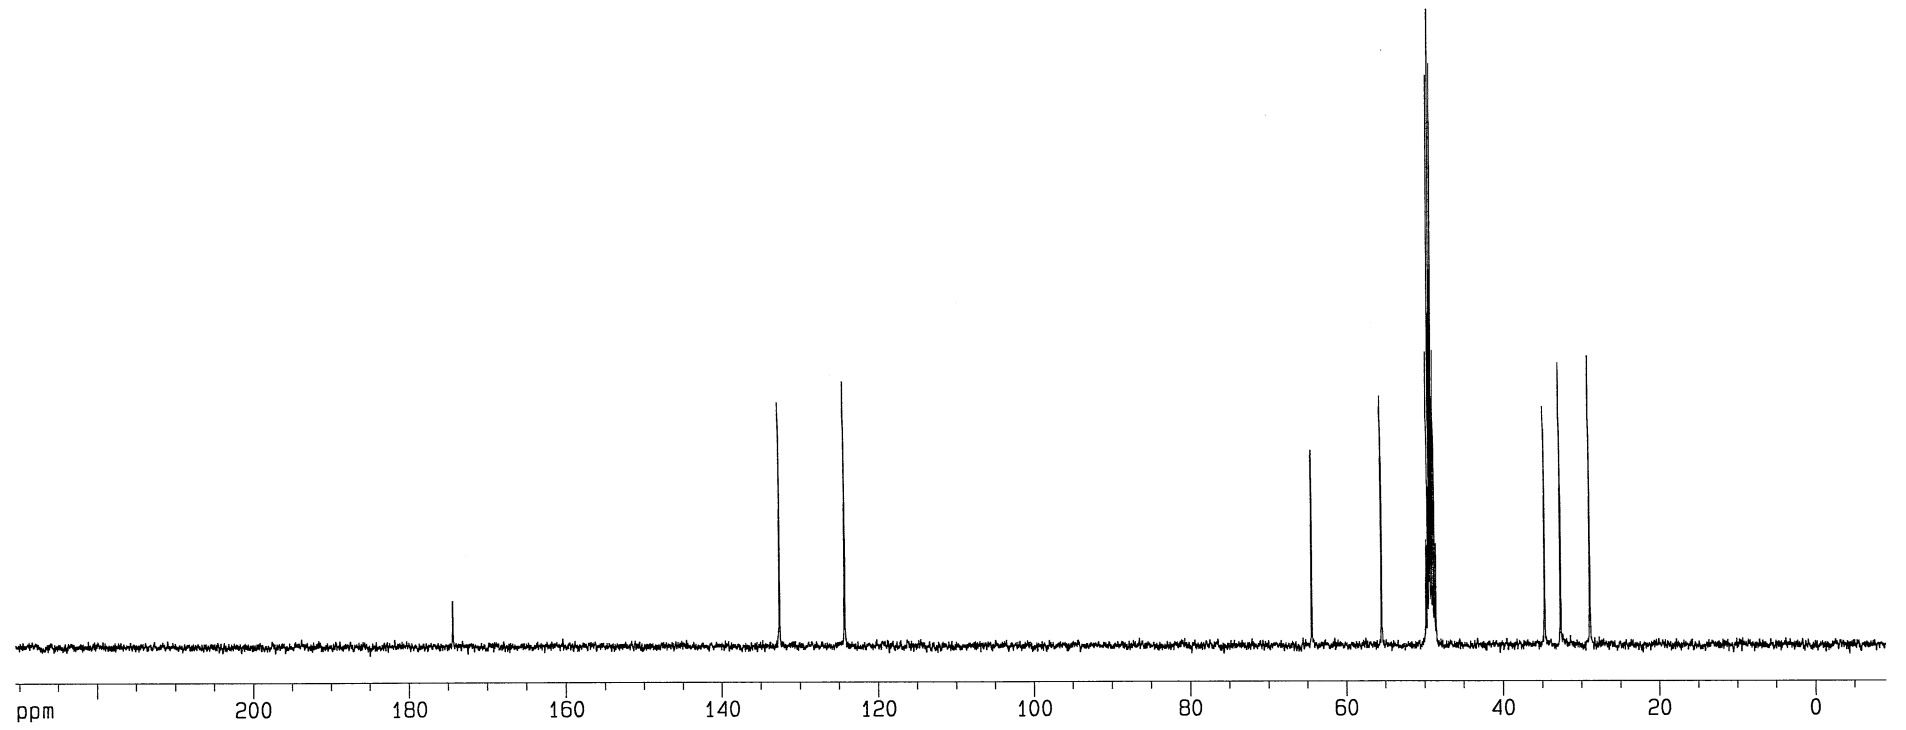

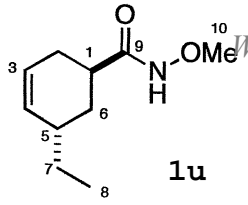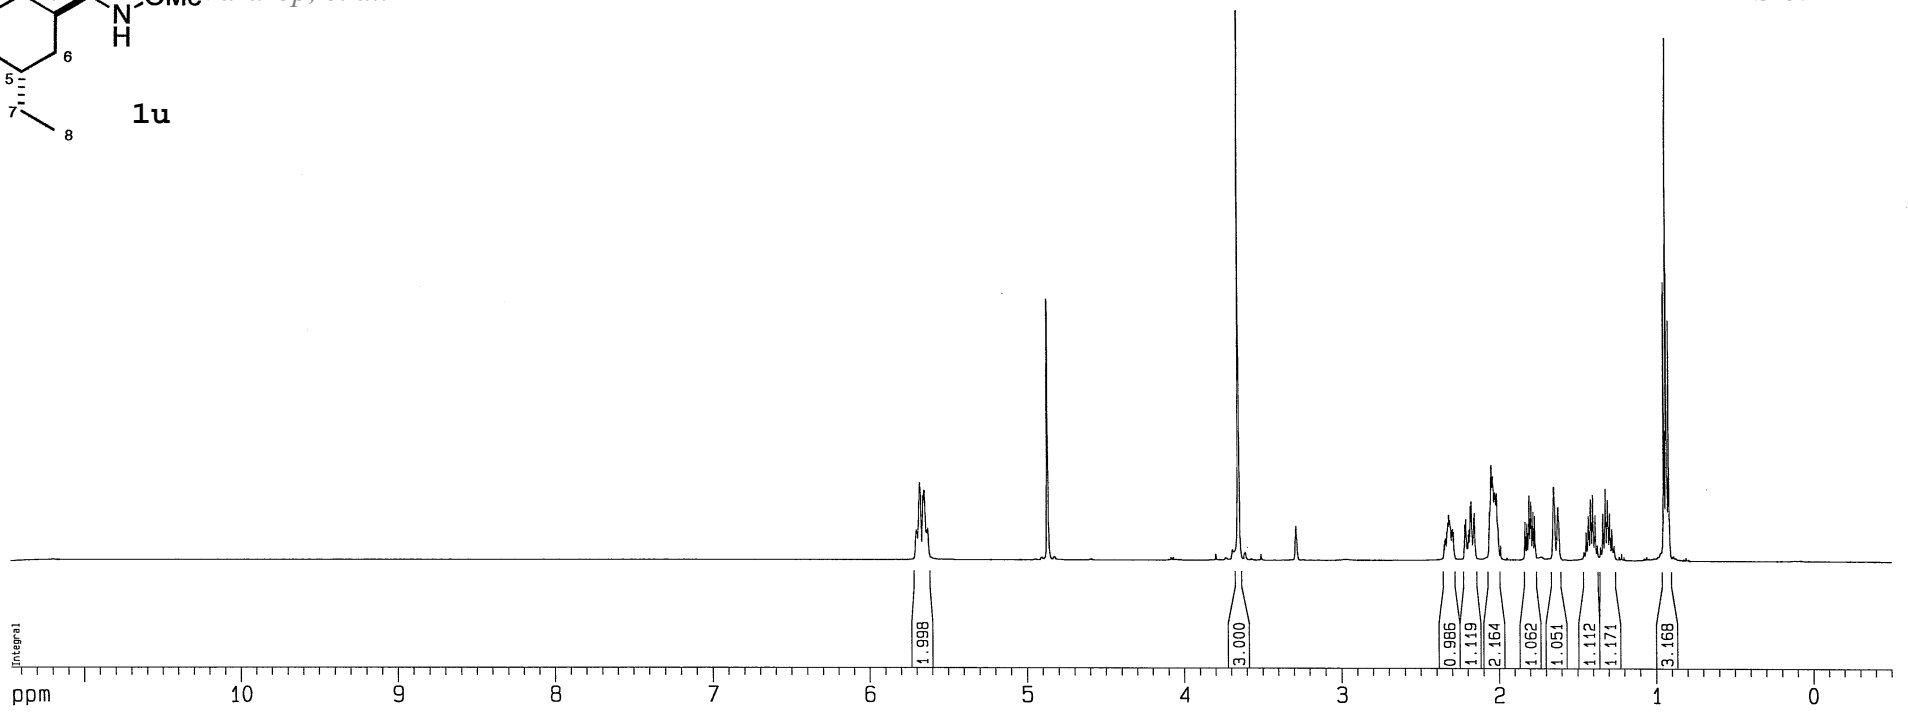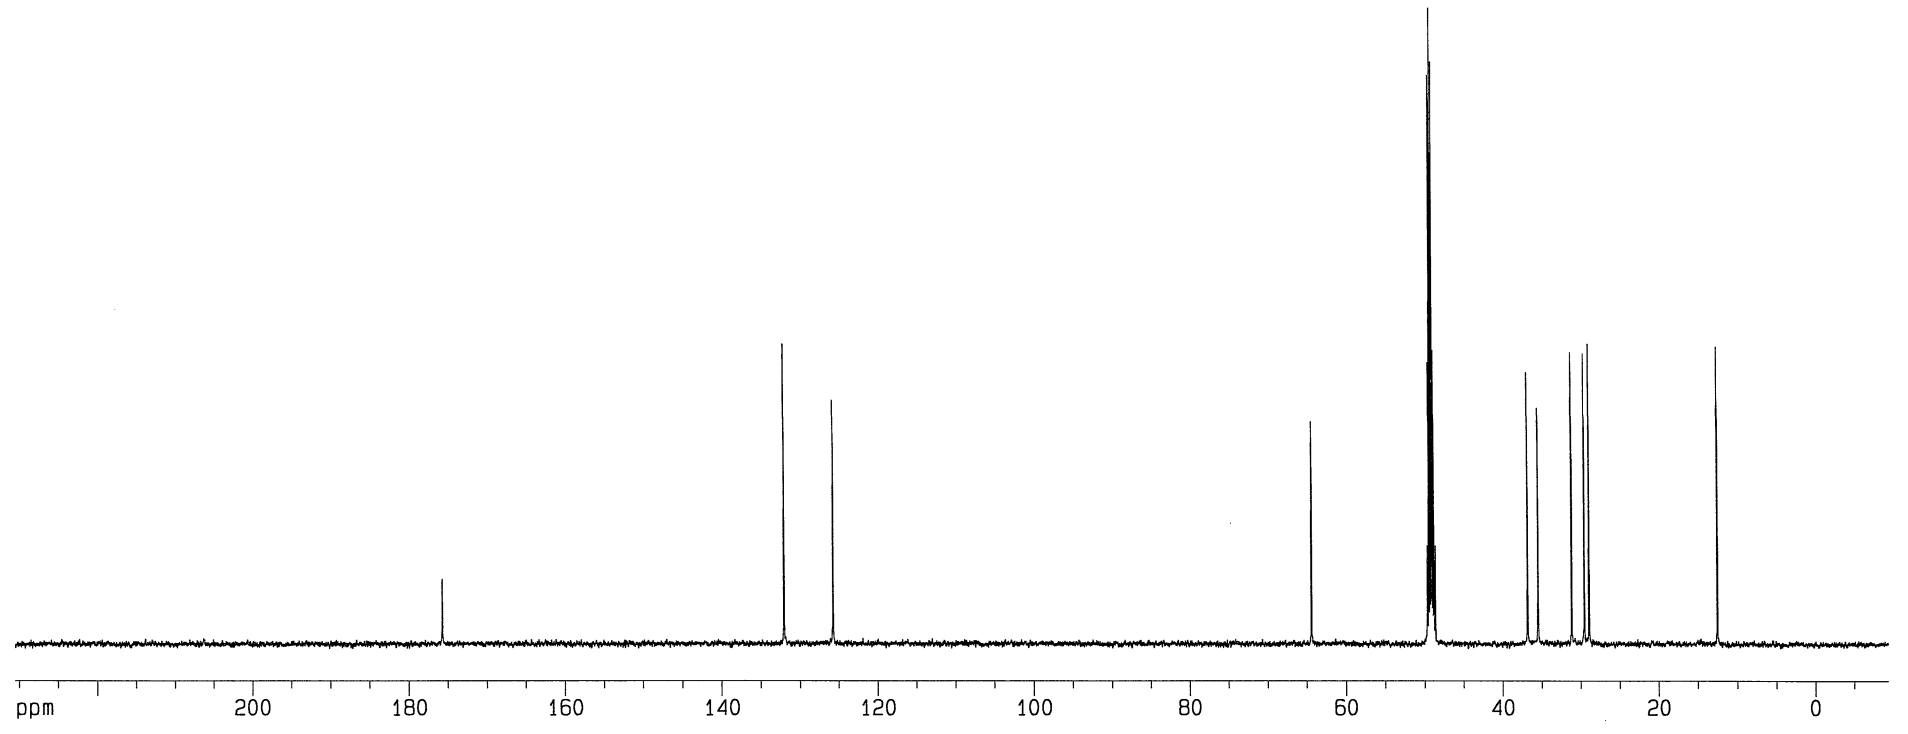

Wardrop, et al.

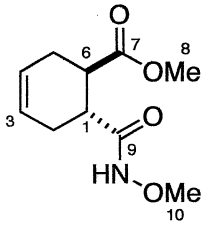

1v

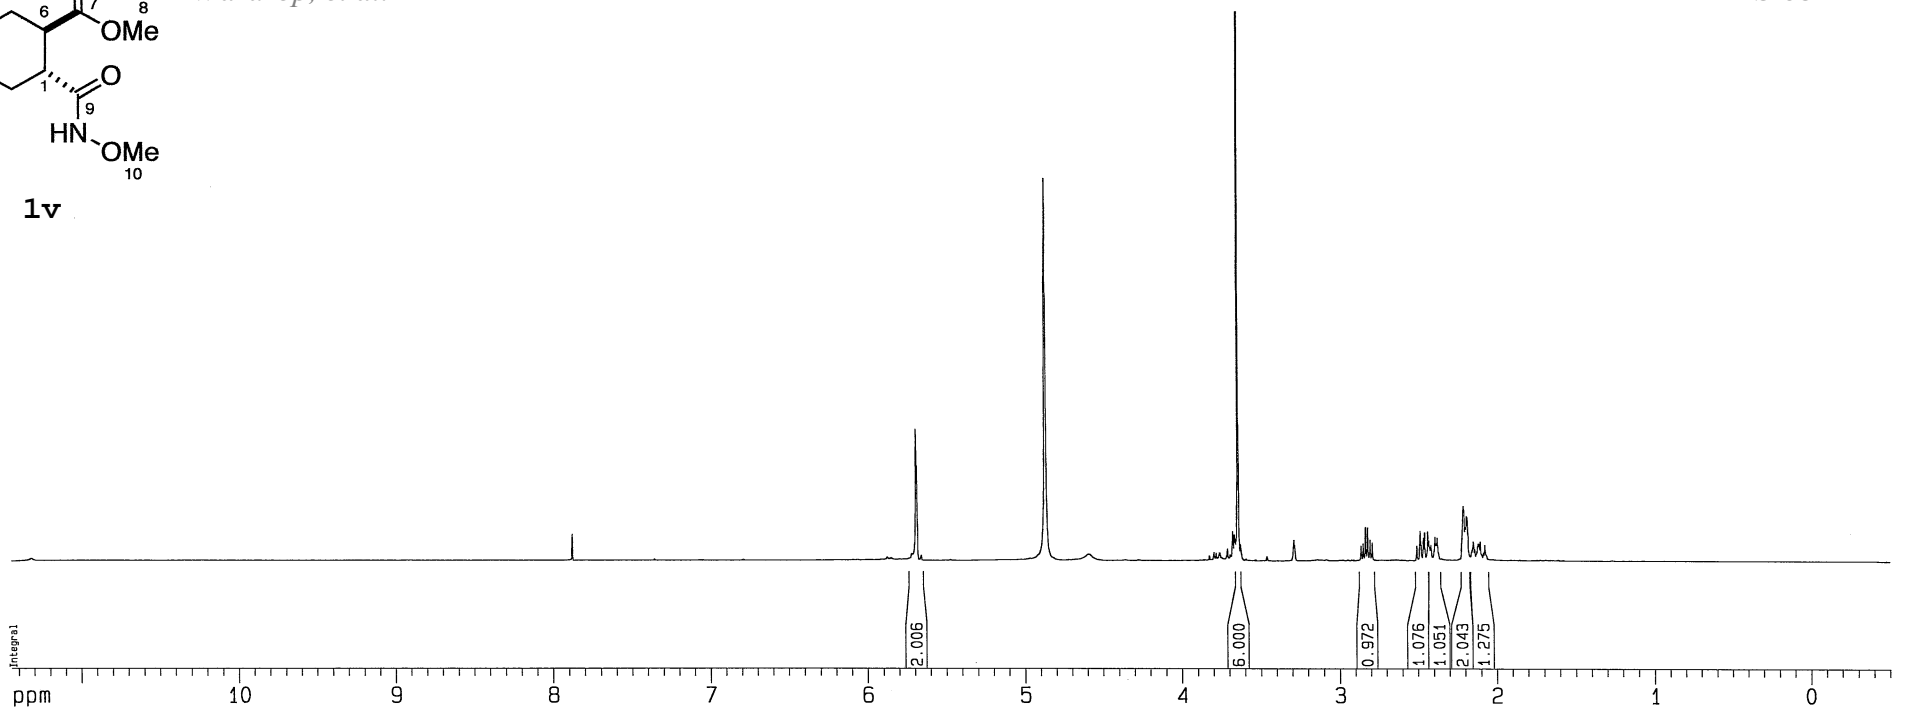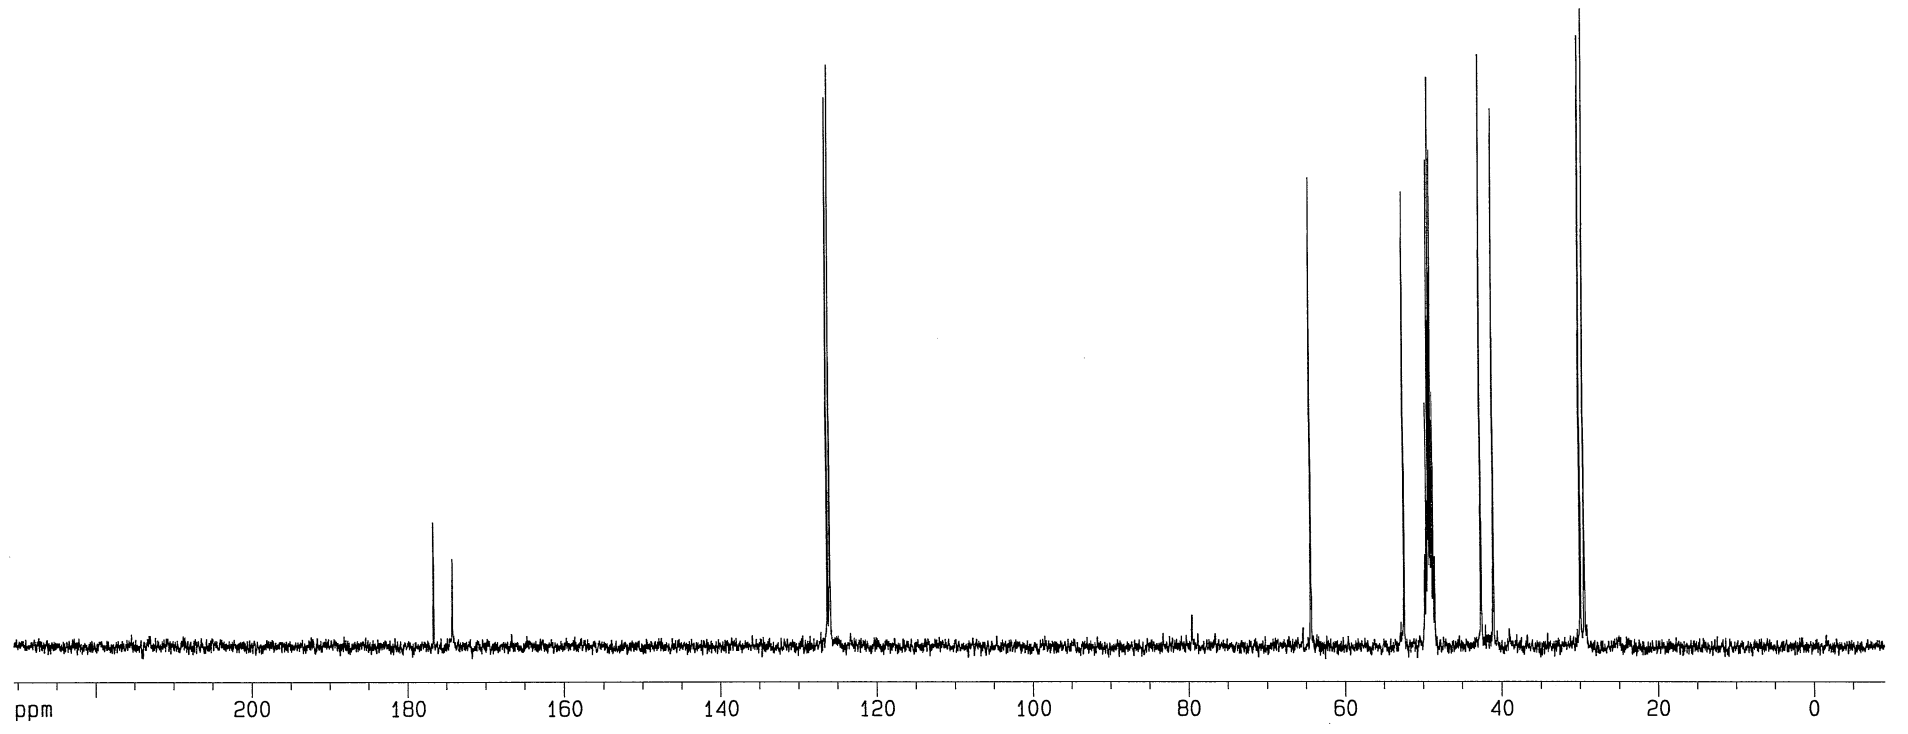

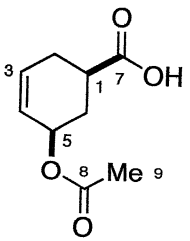

Wardrop, et al.

S-69

11w

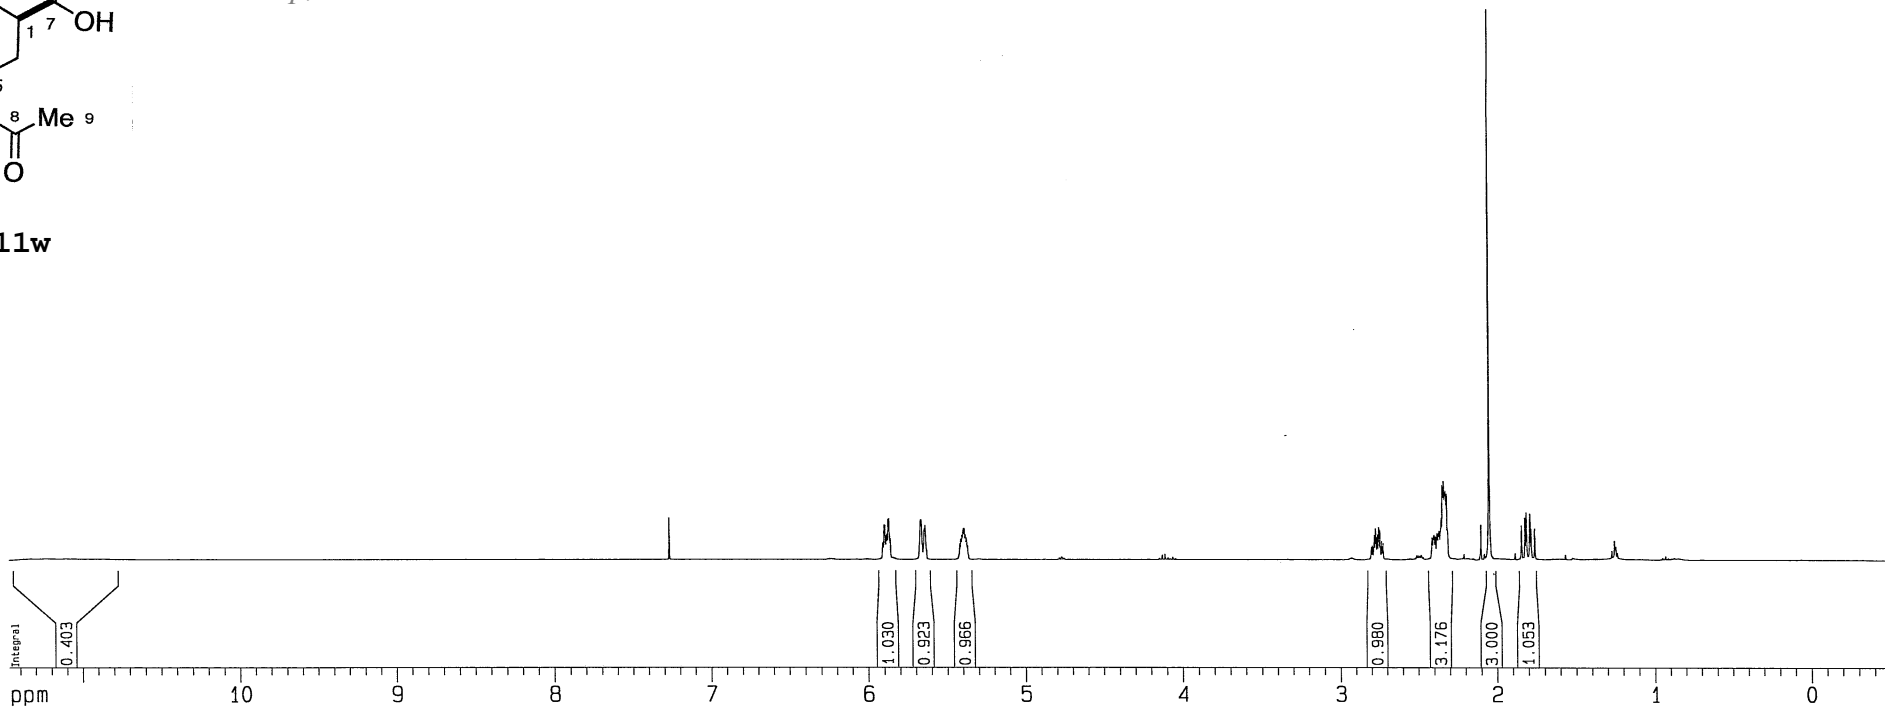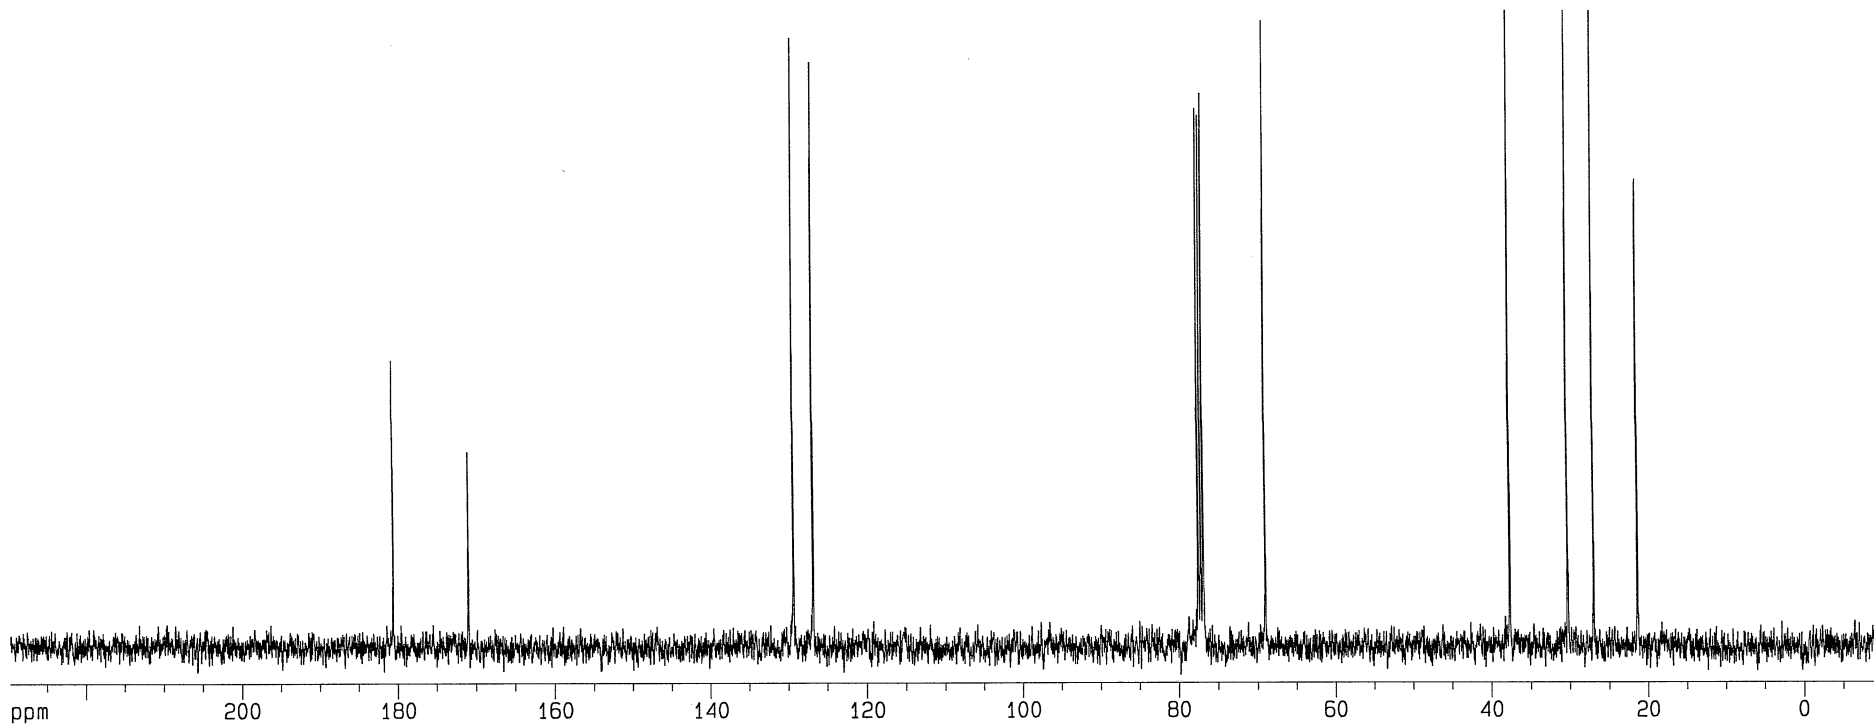

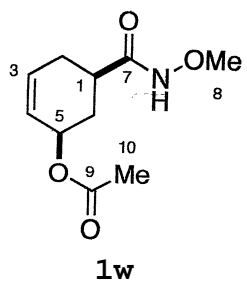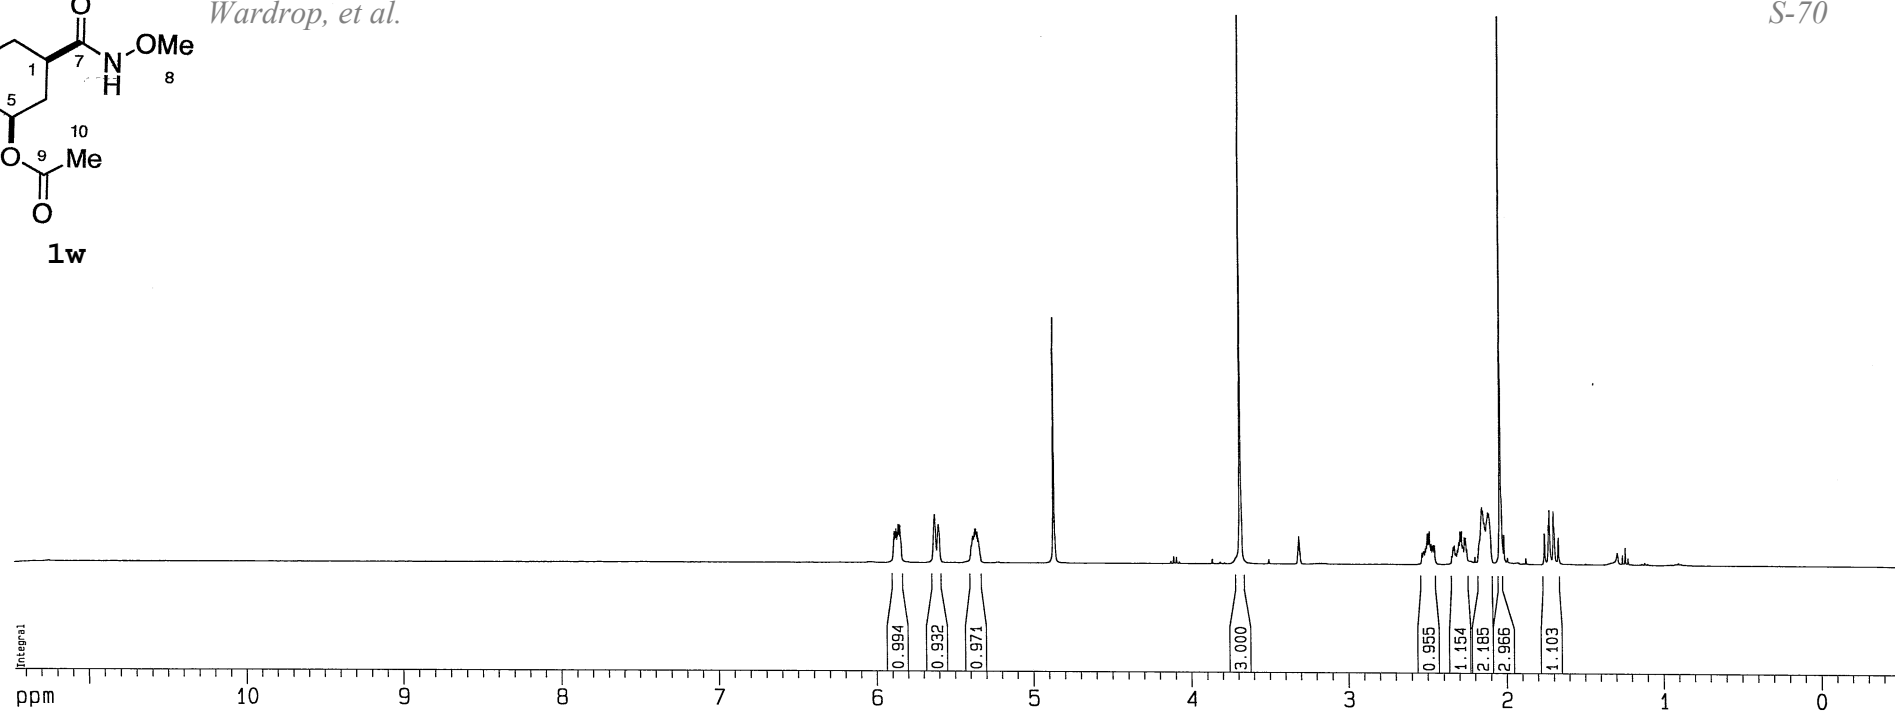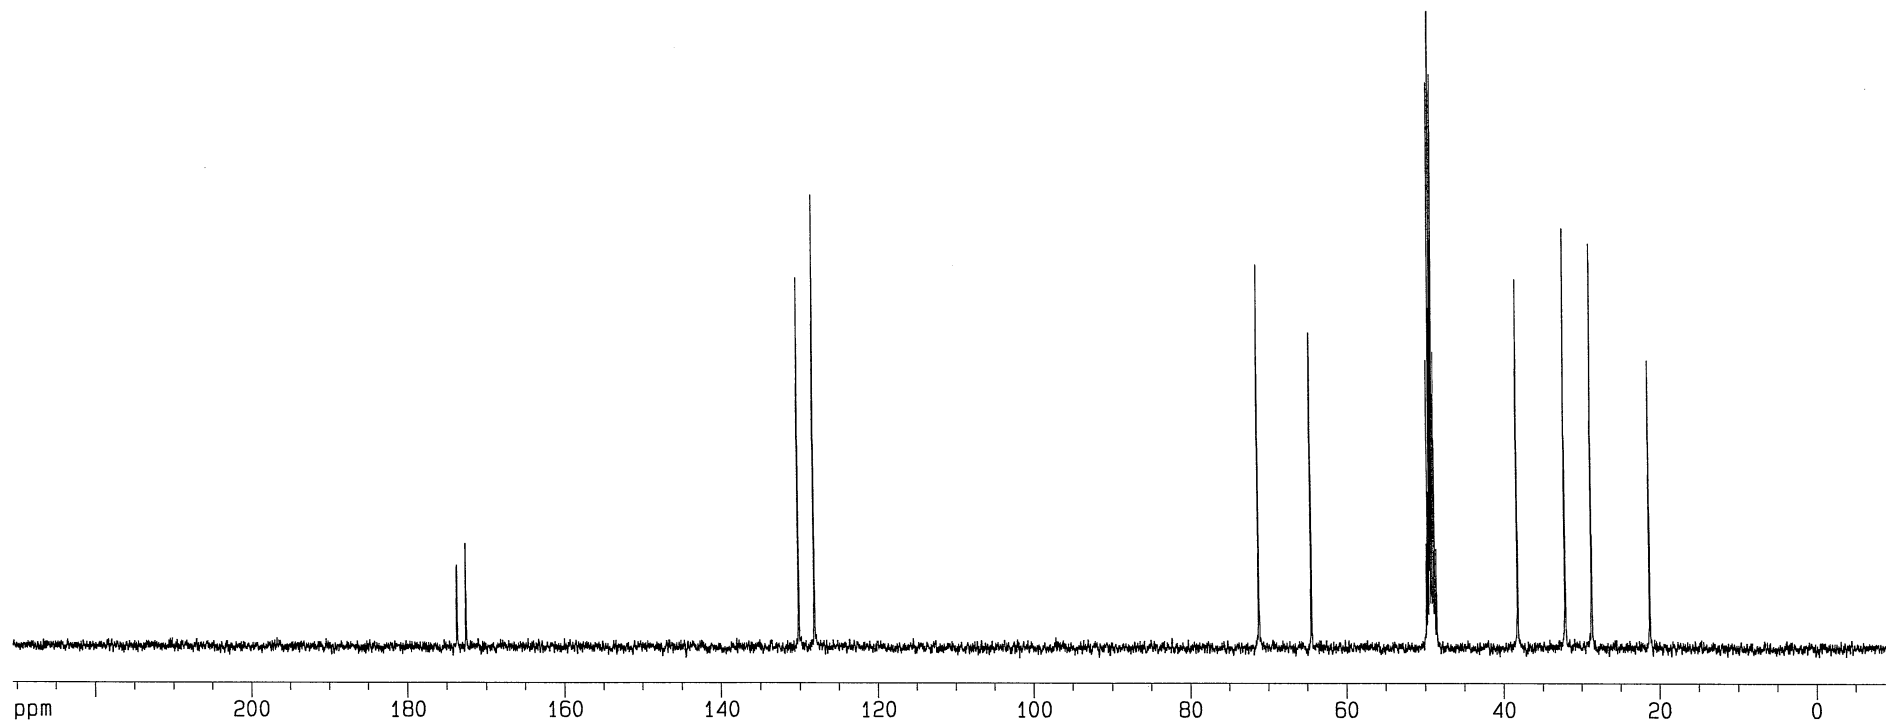

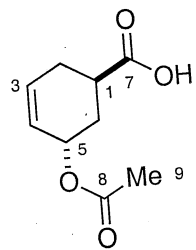

11x

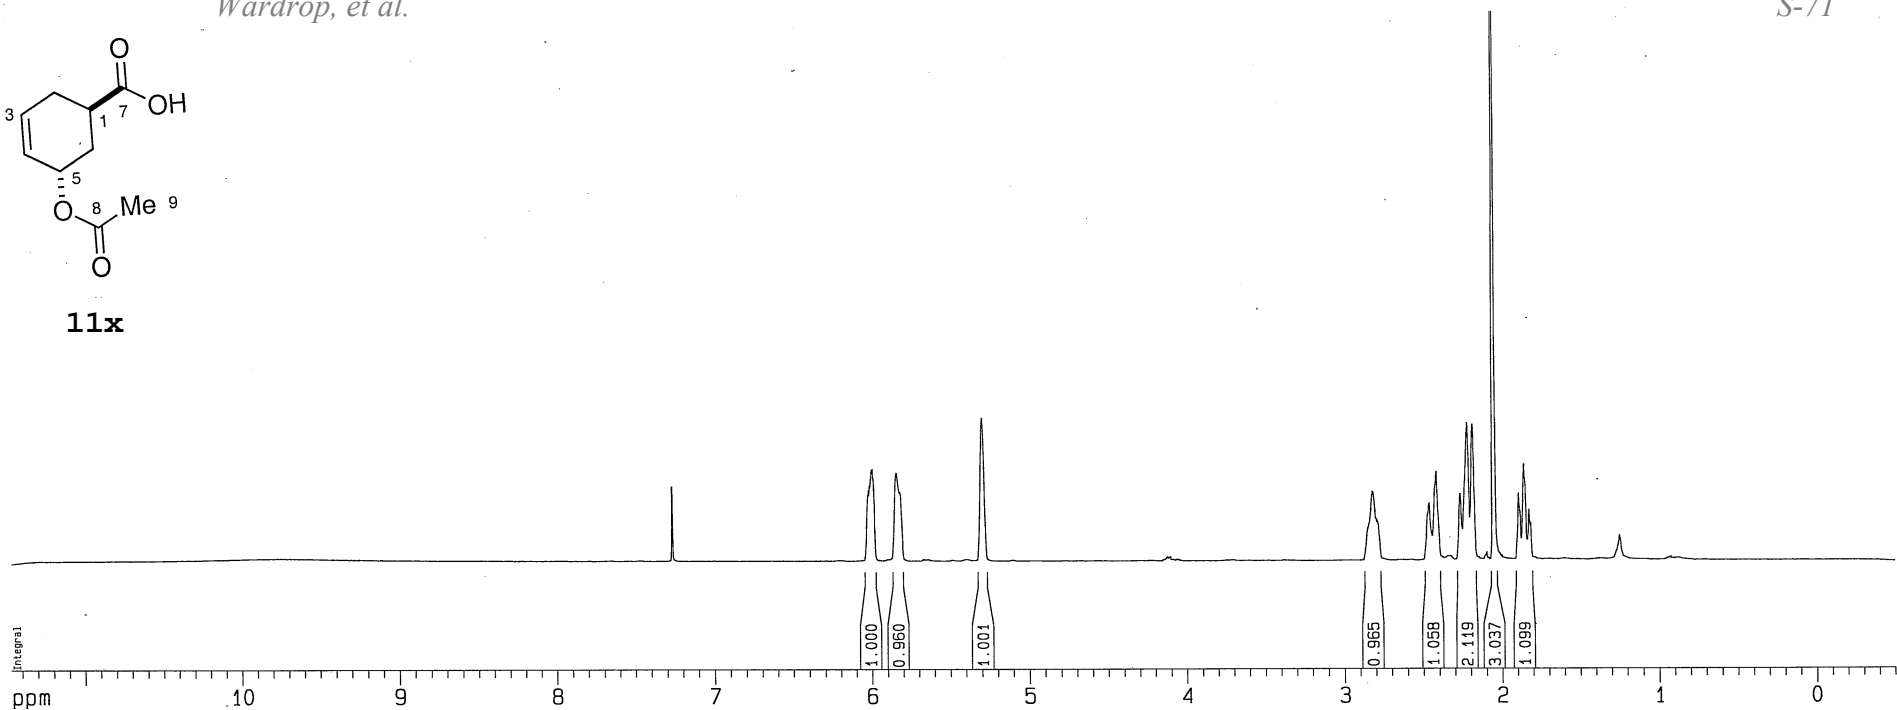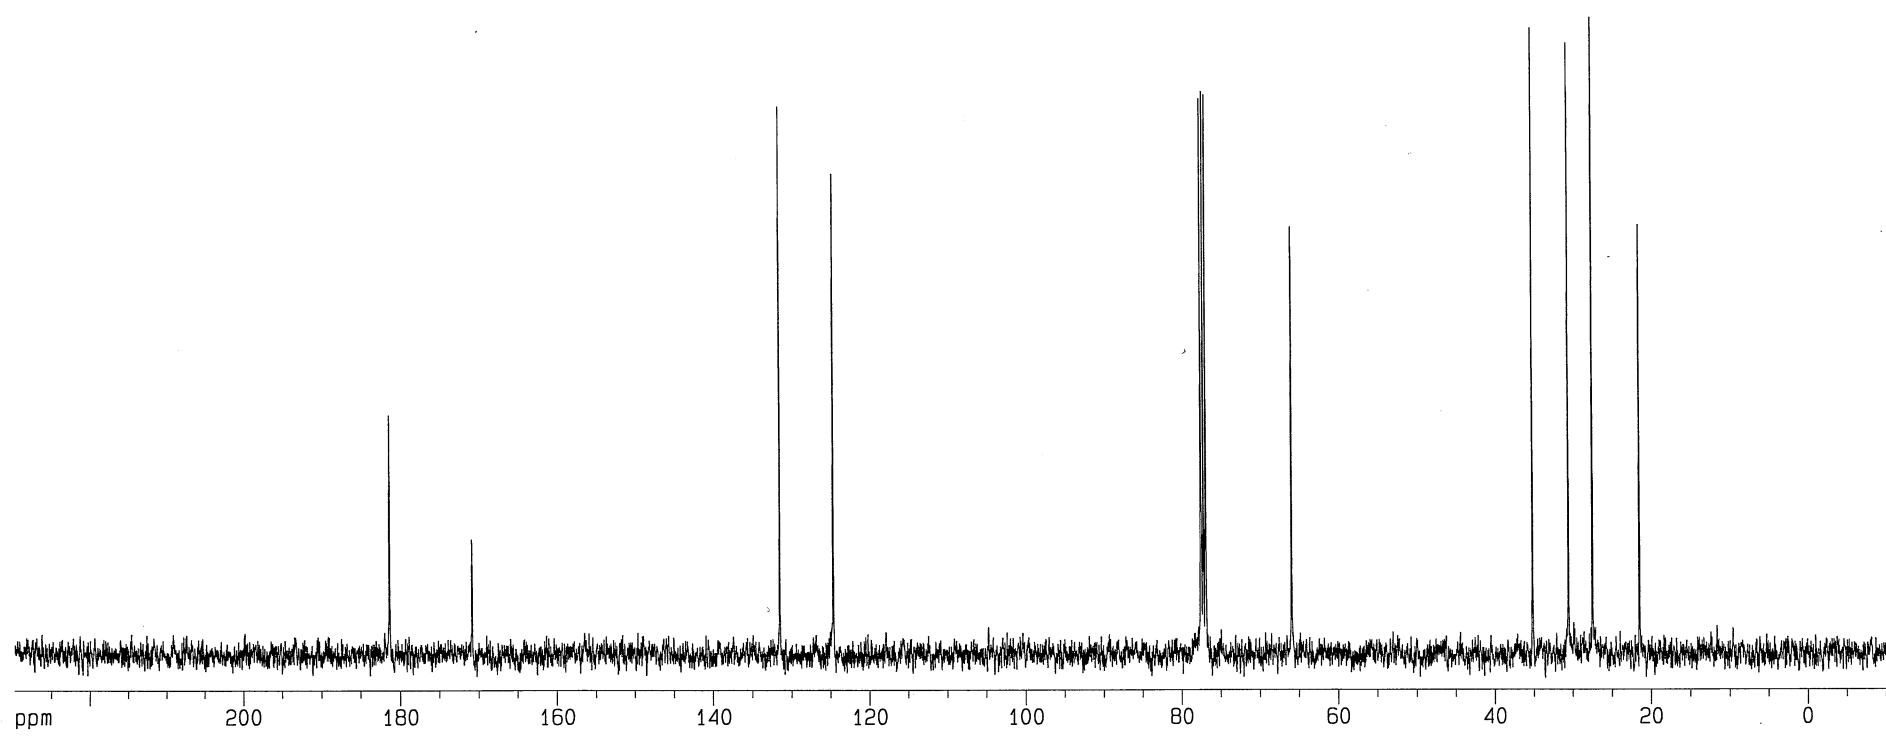



Wardrop, et al.

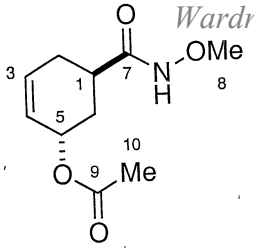

1x

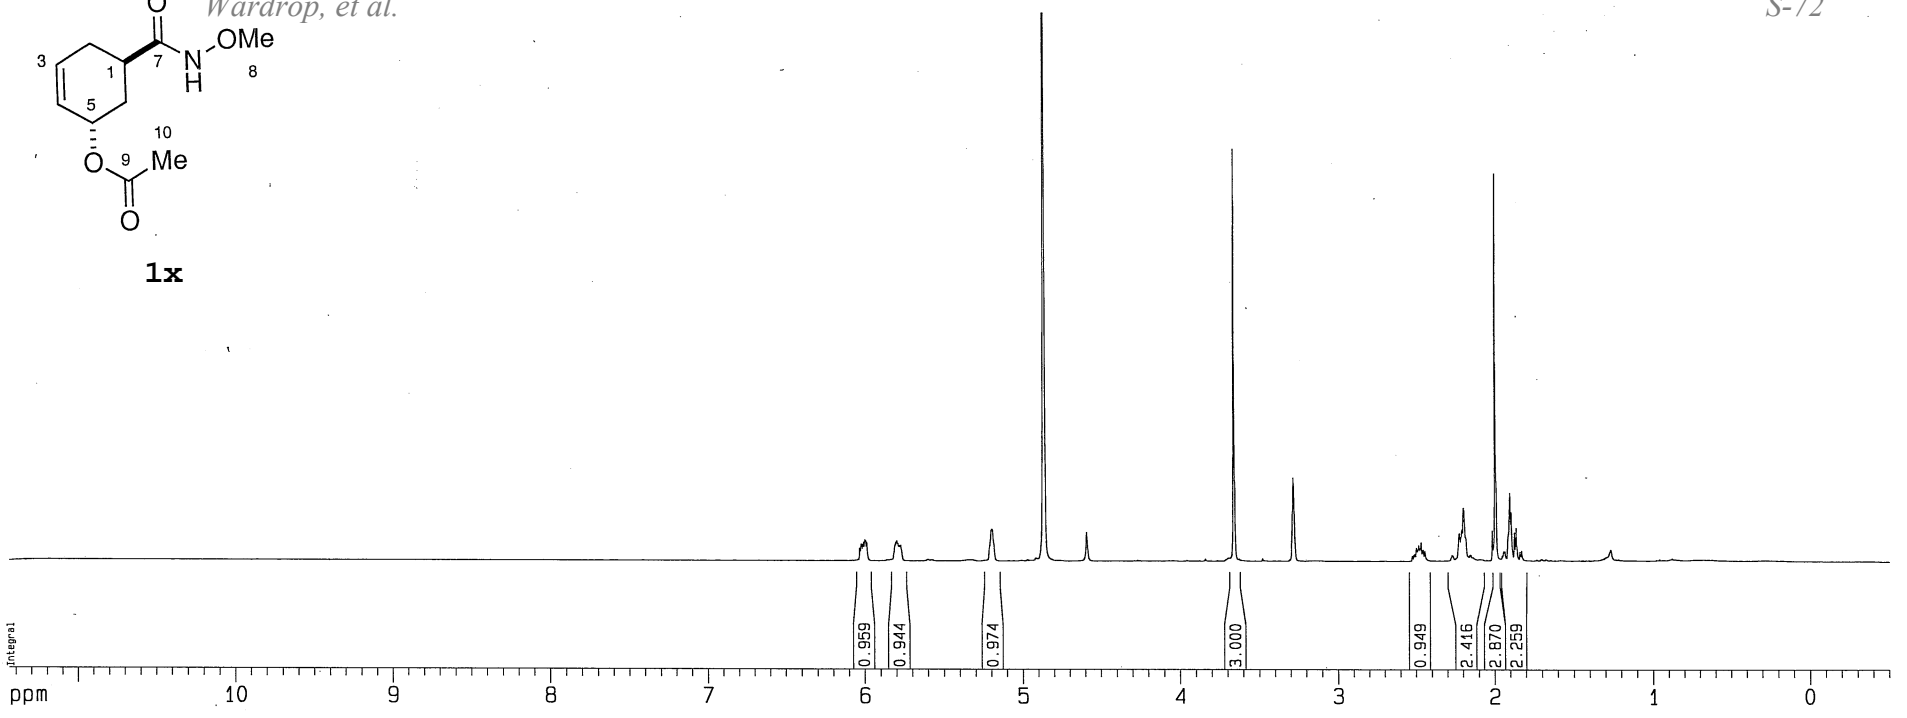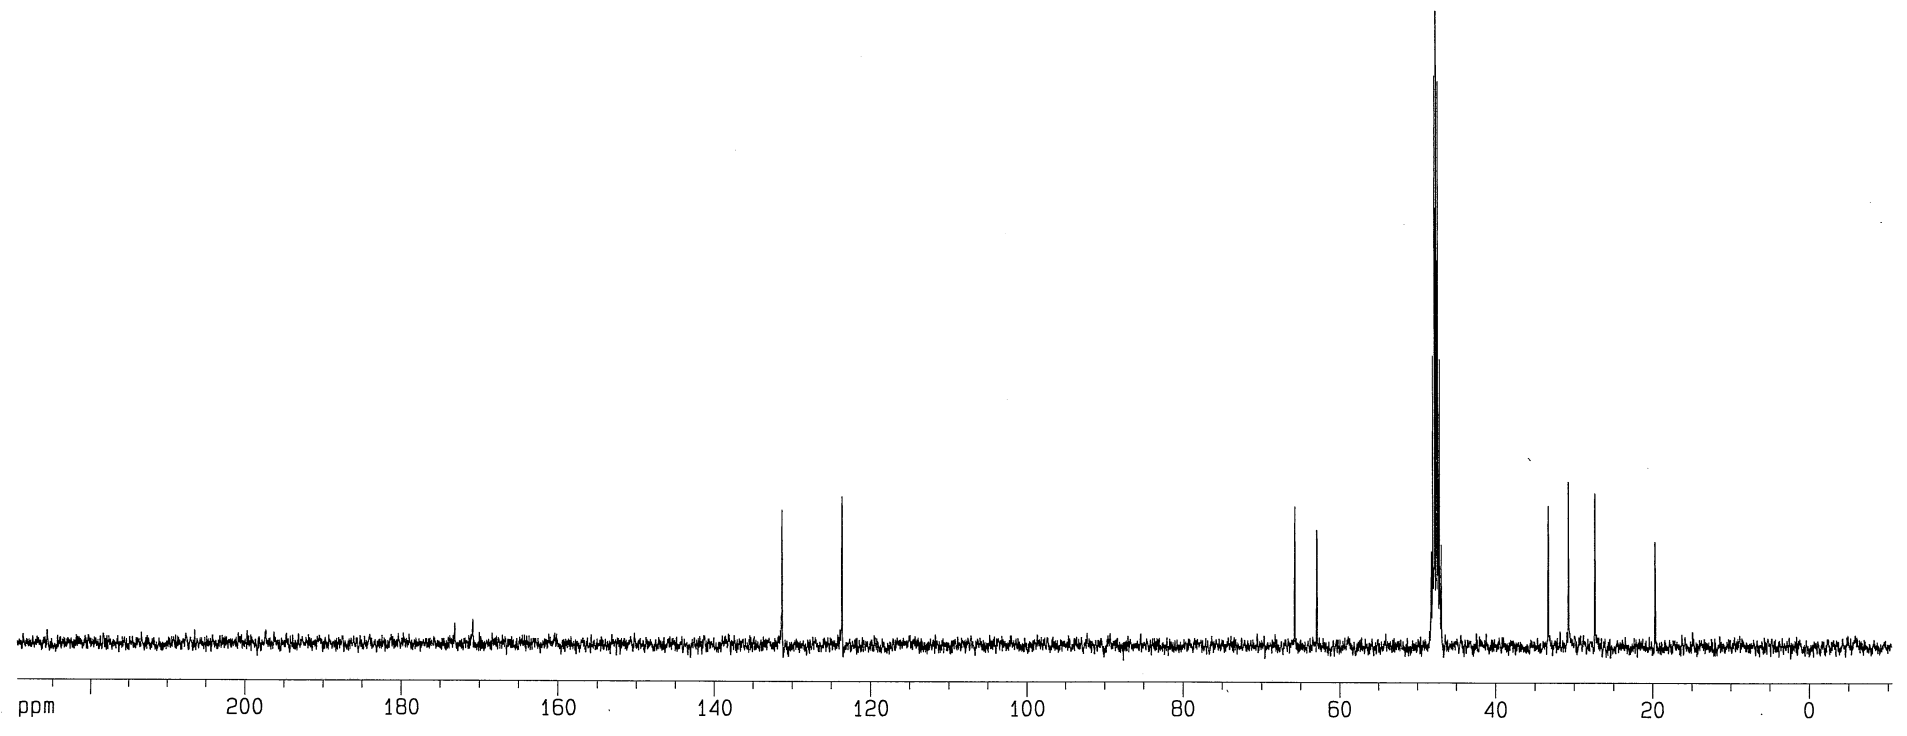

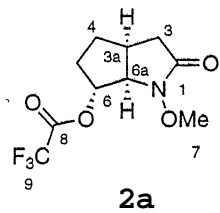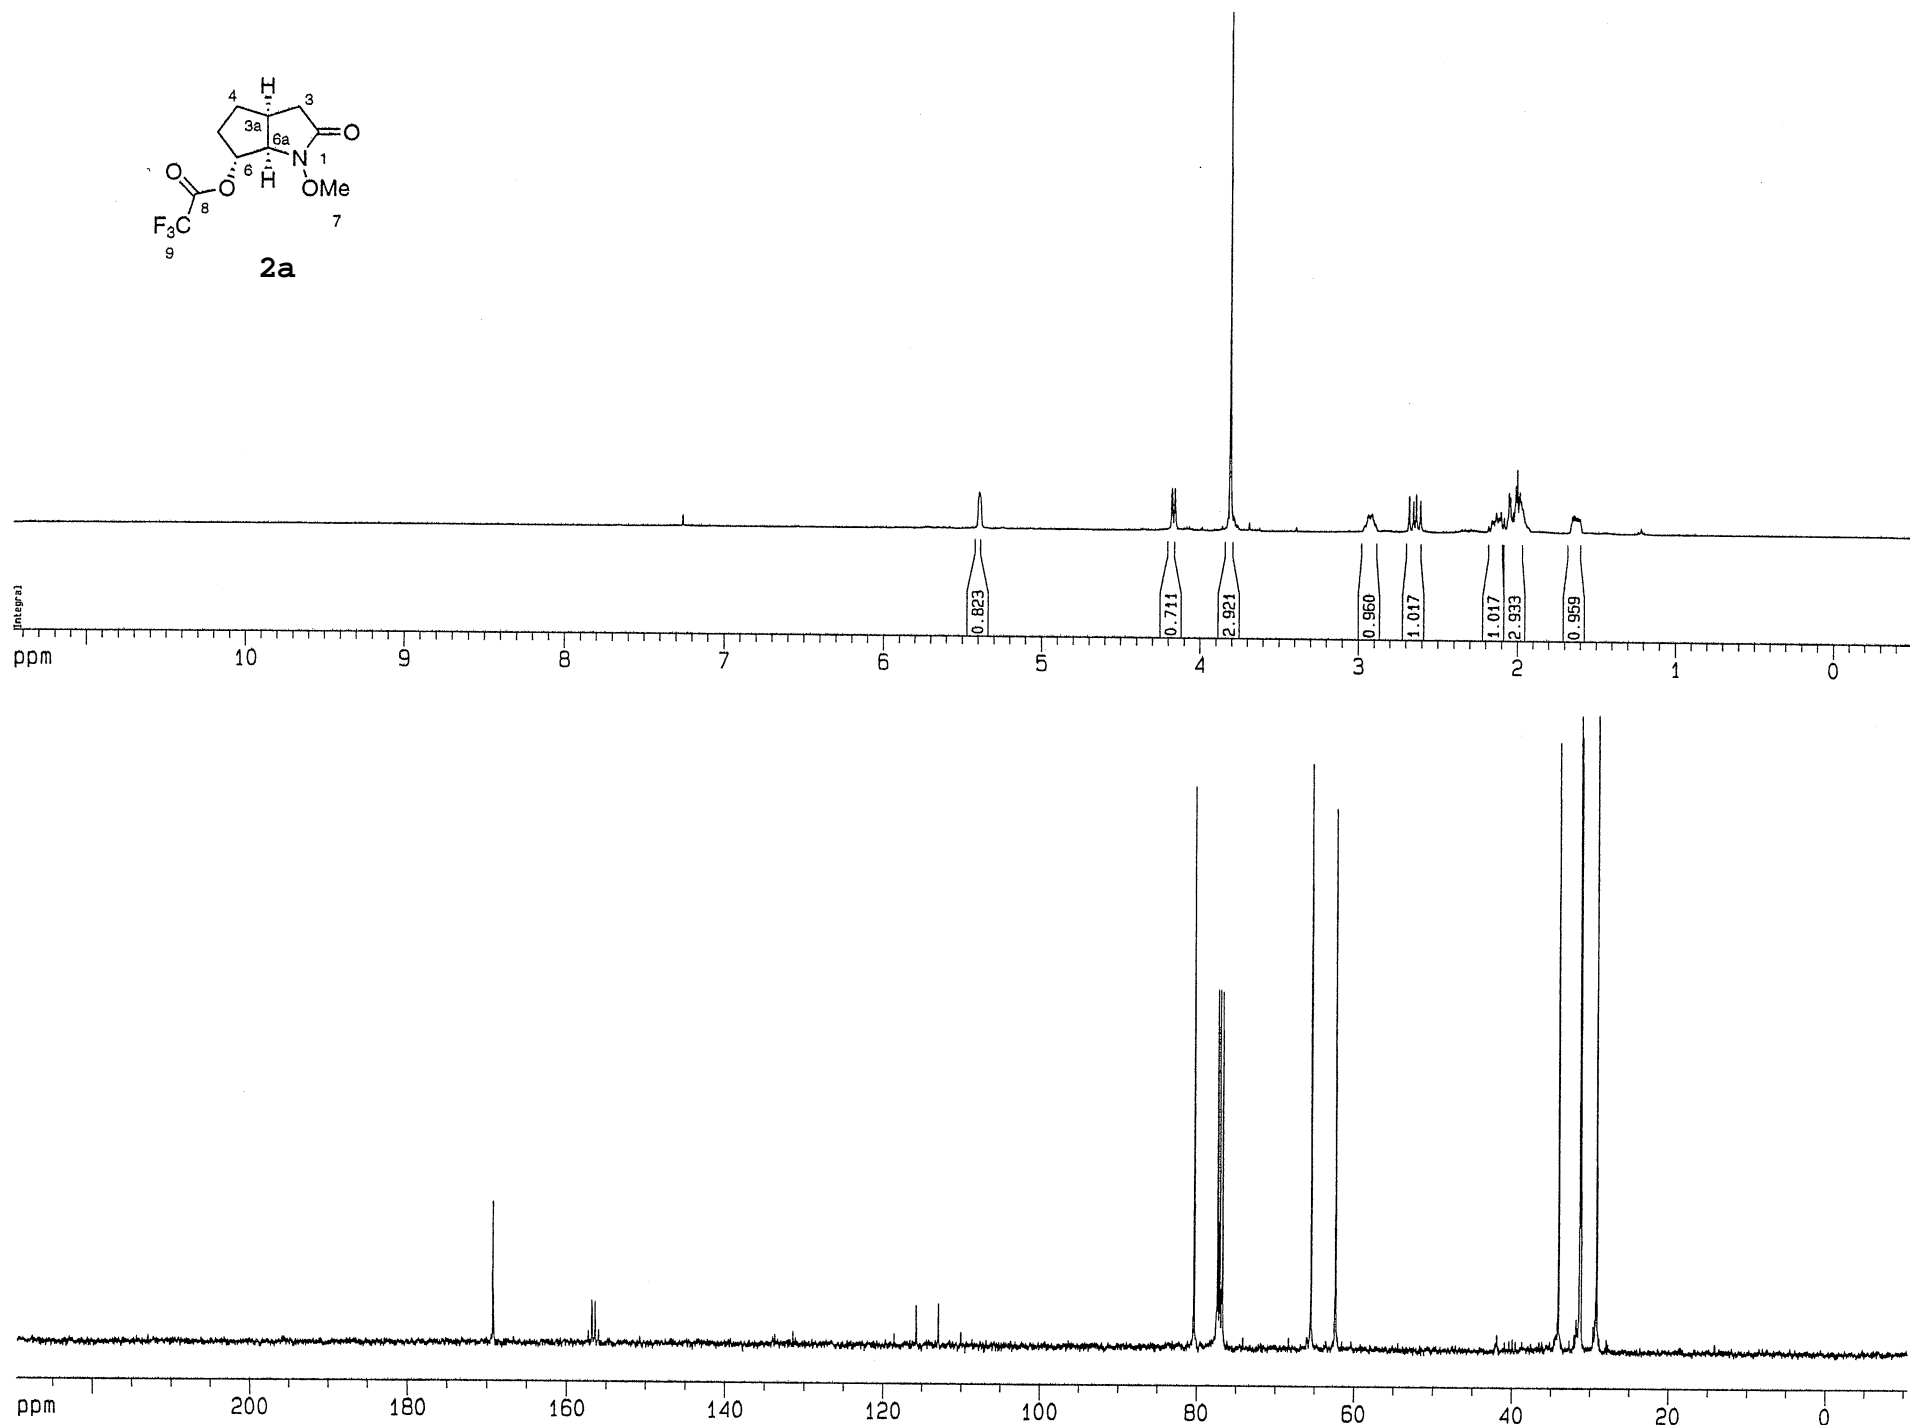

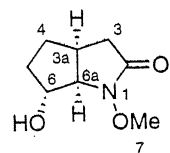**3a**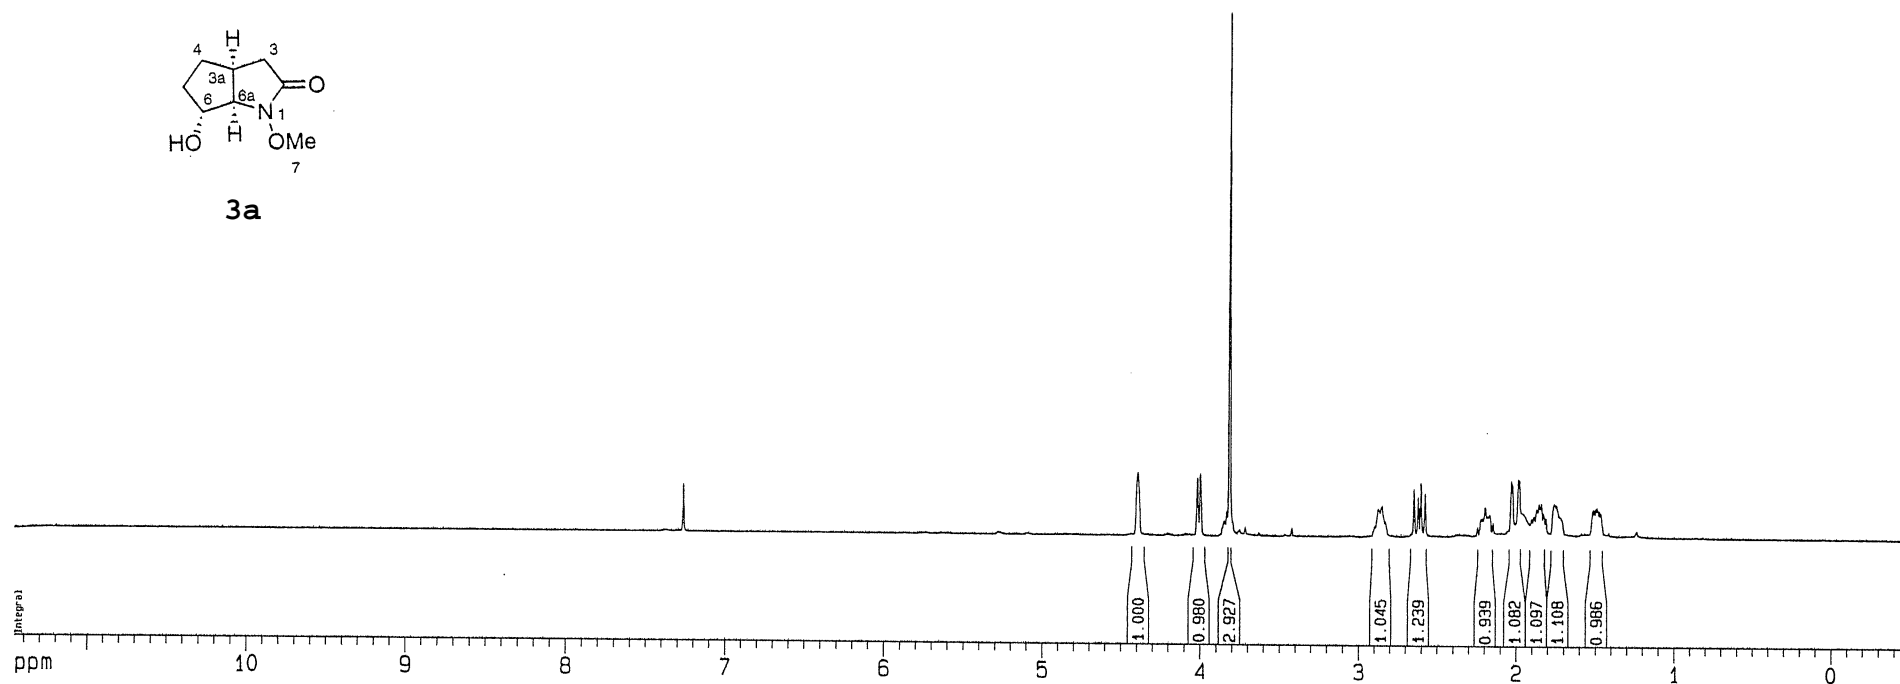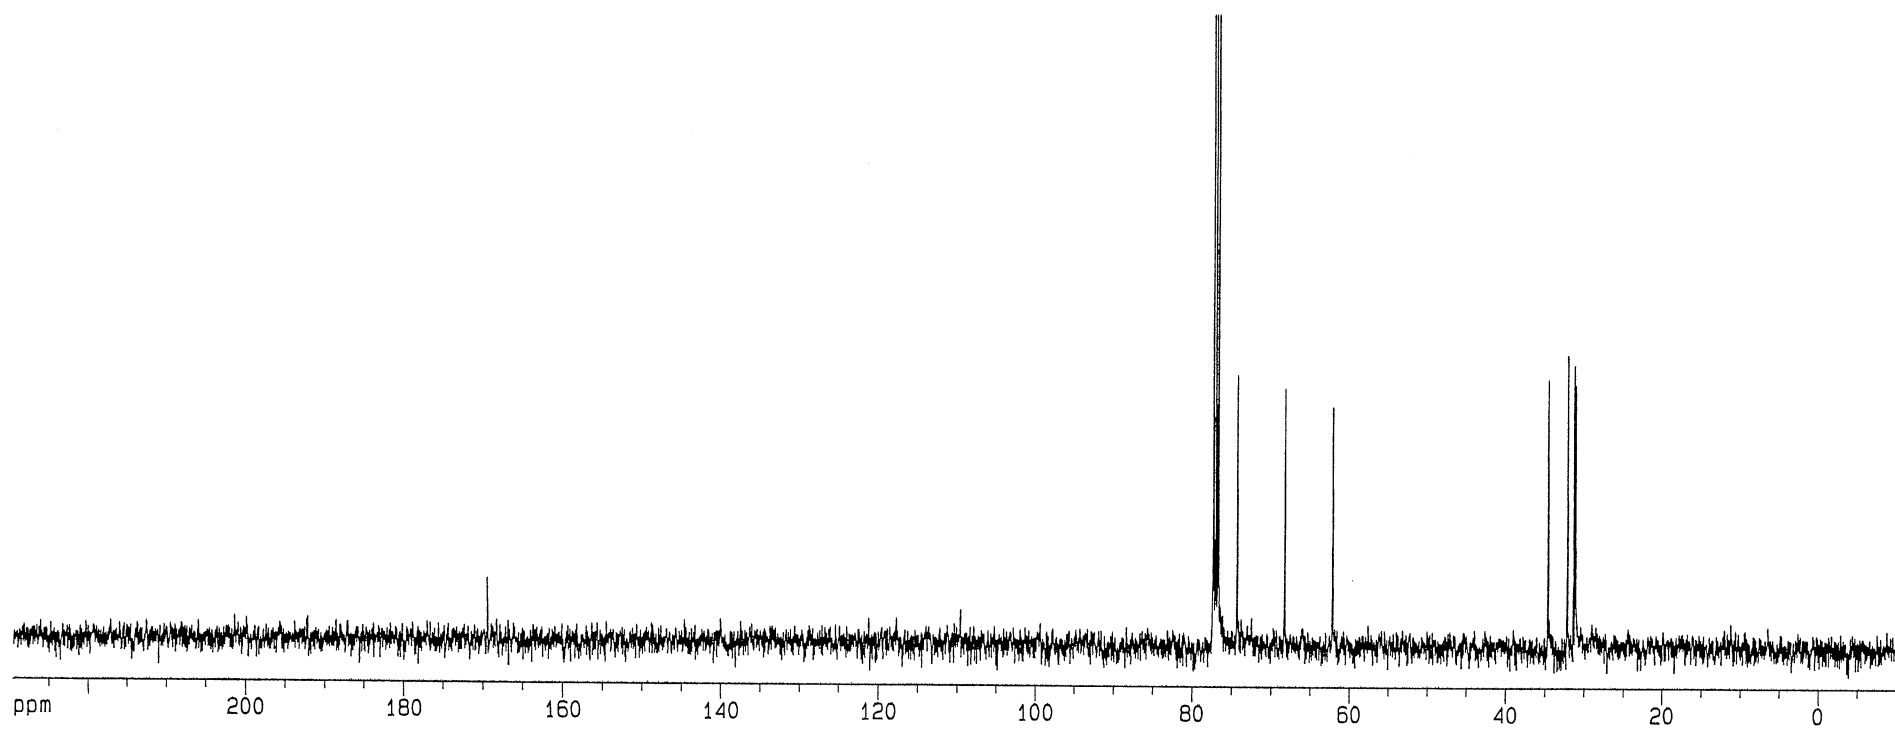

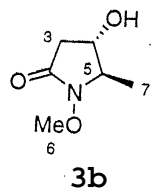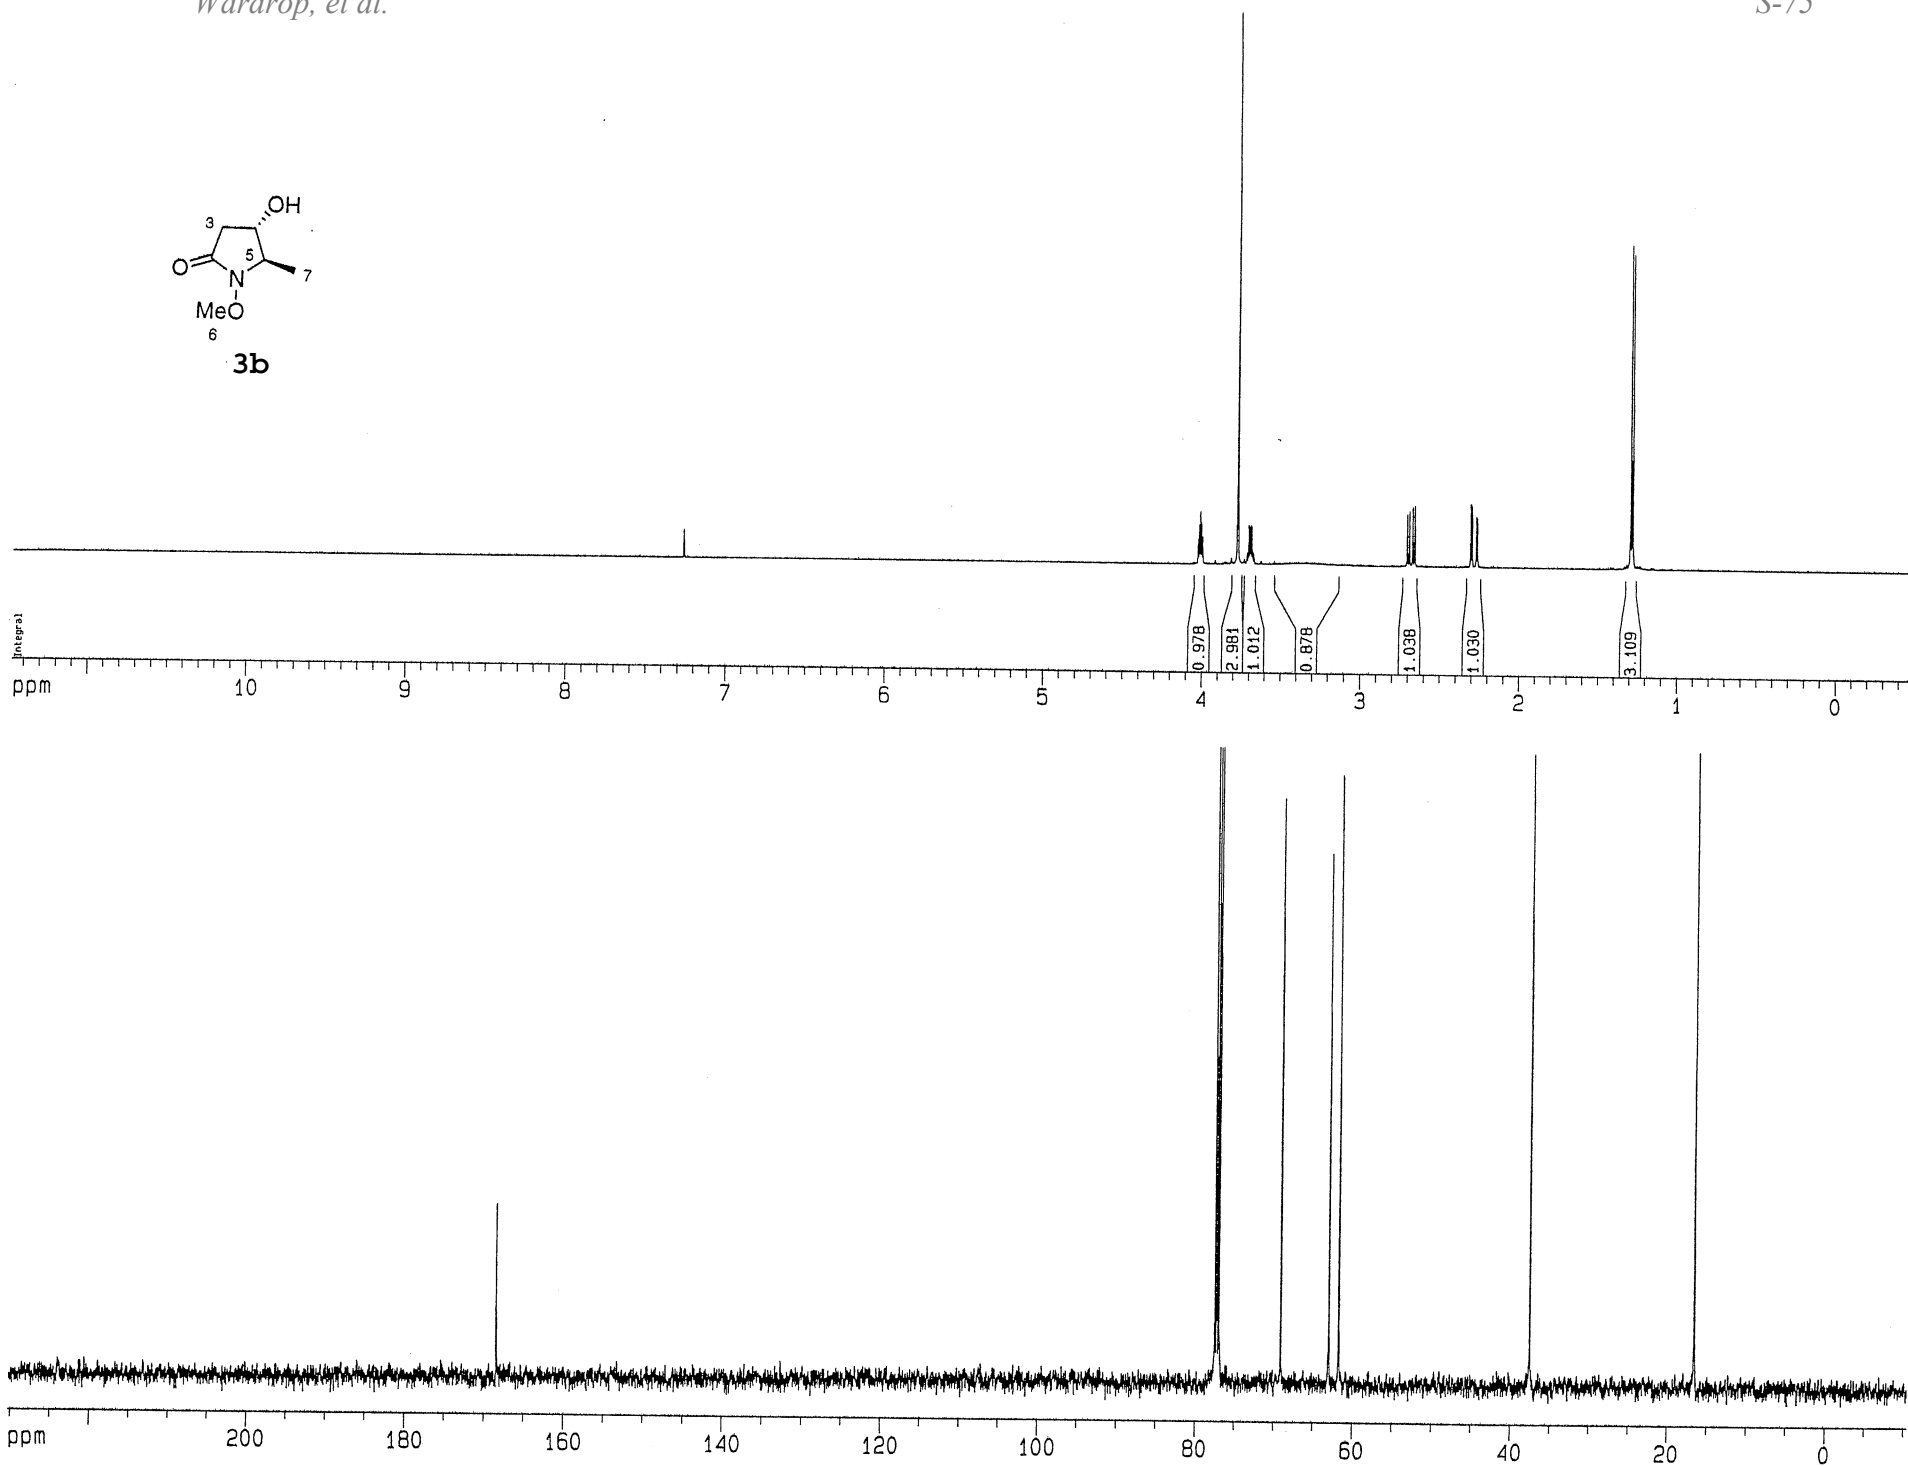

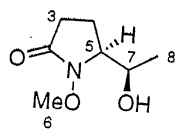**3c**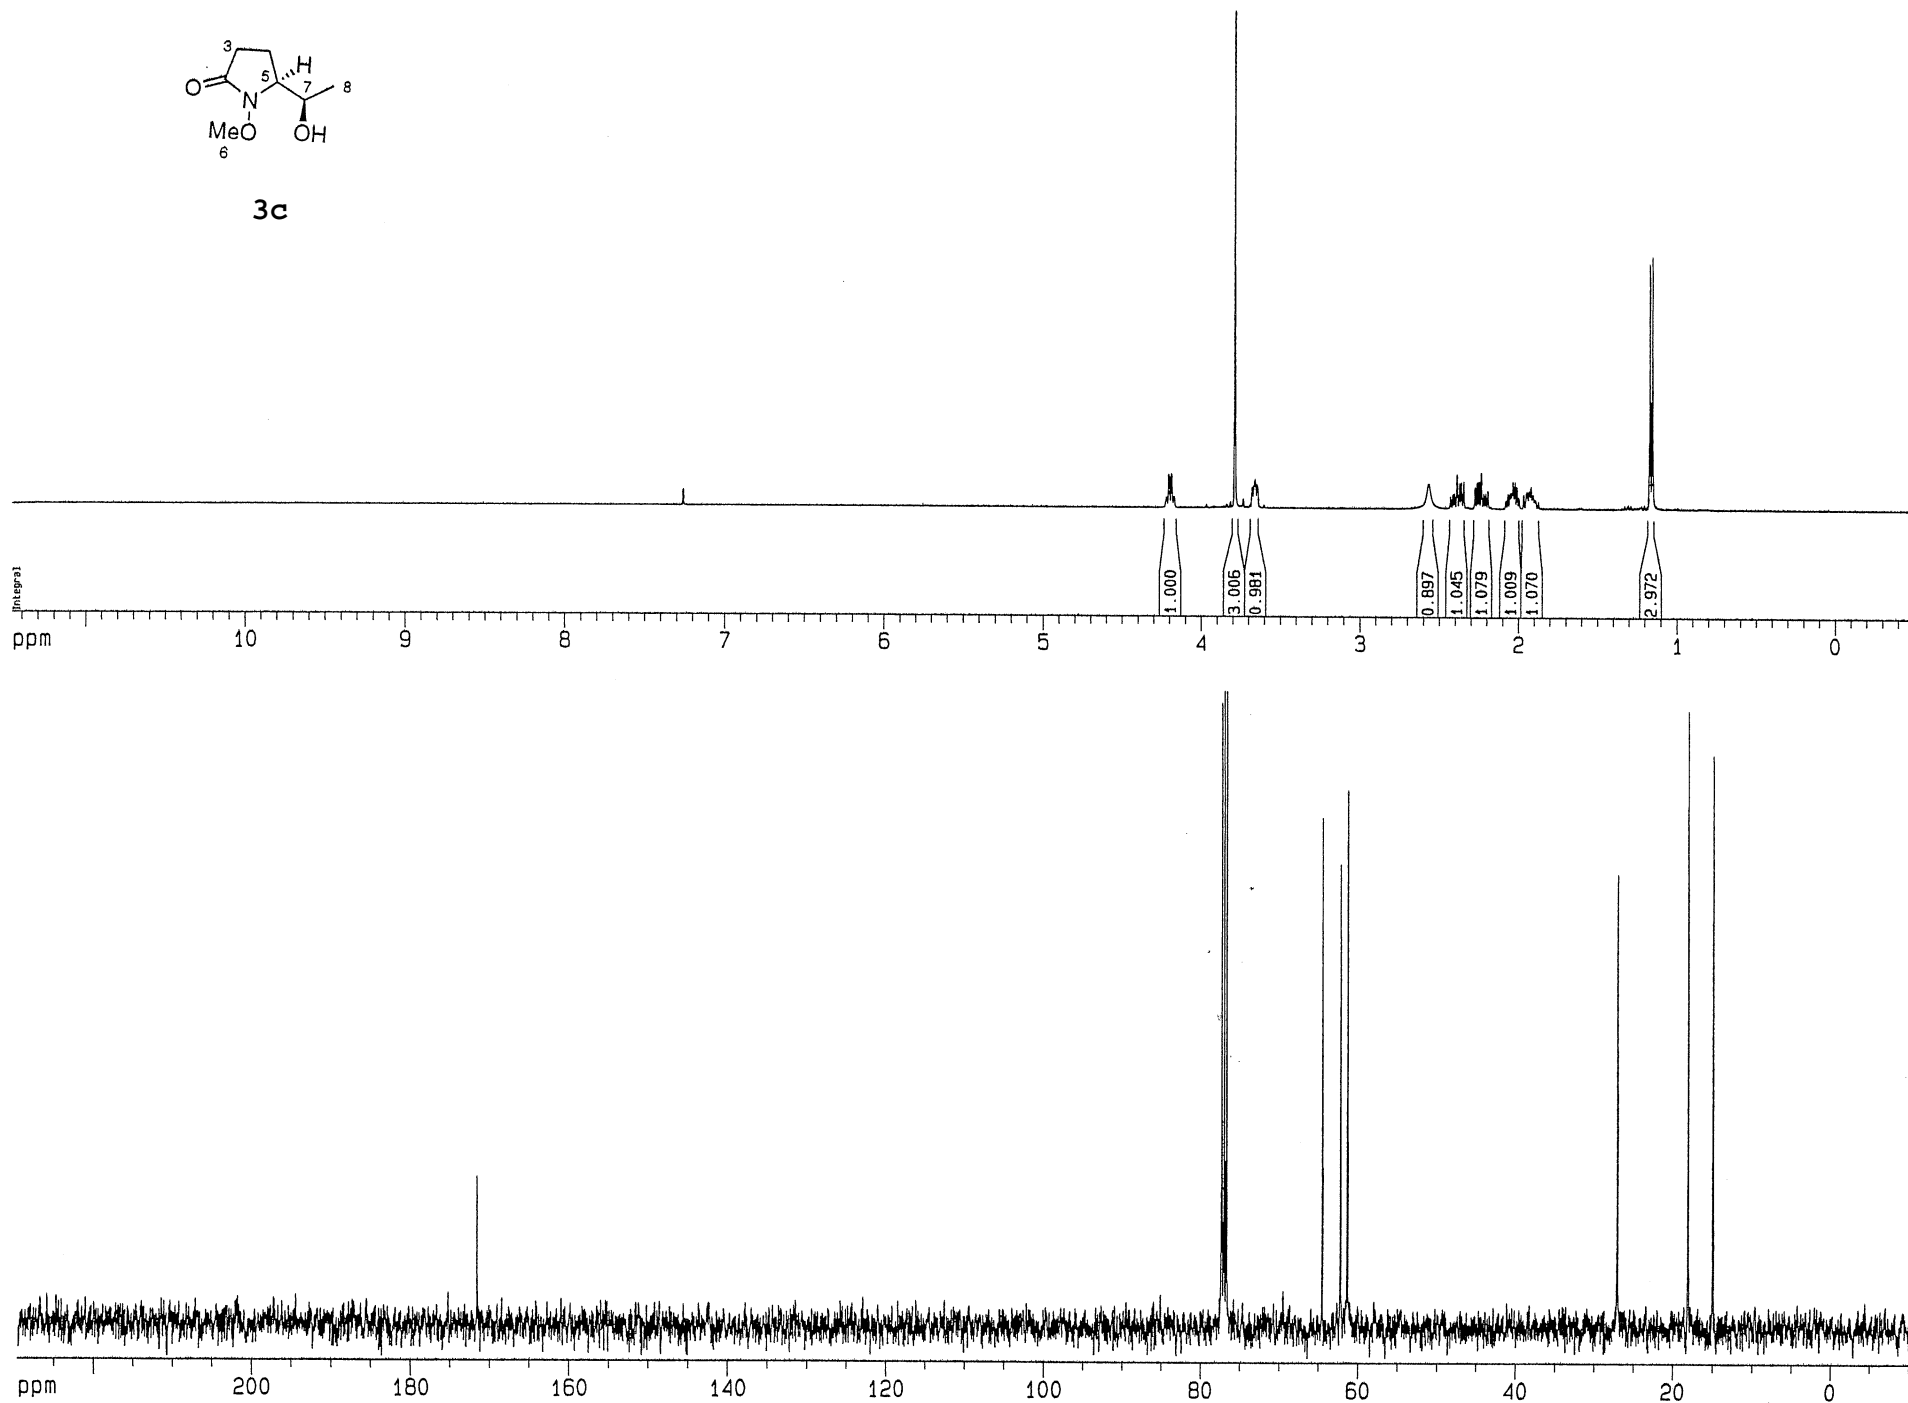

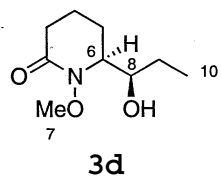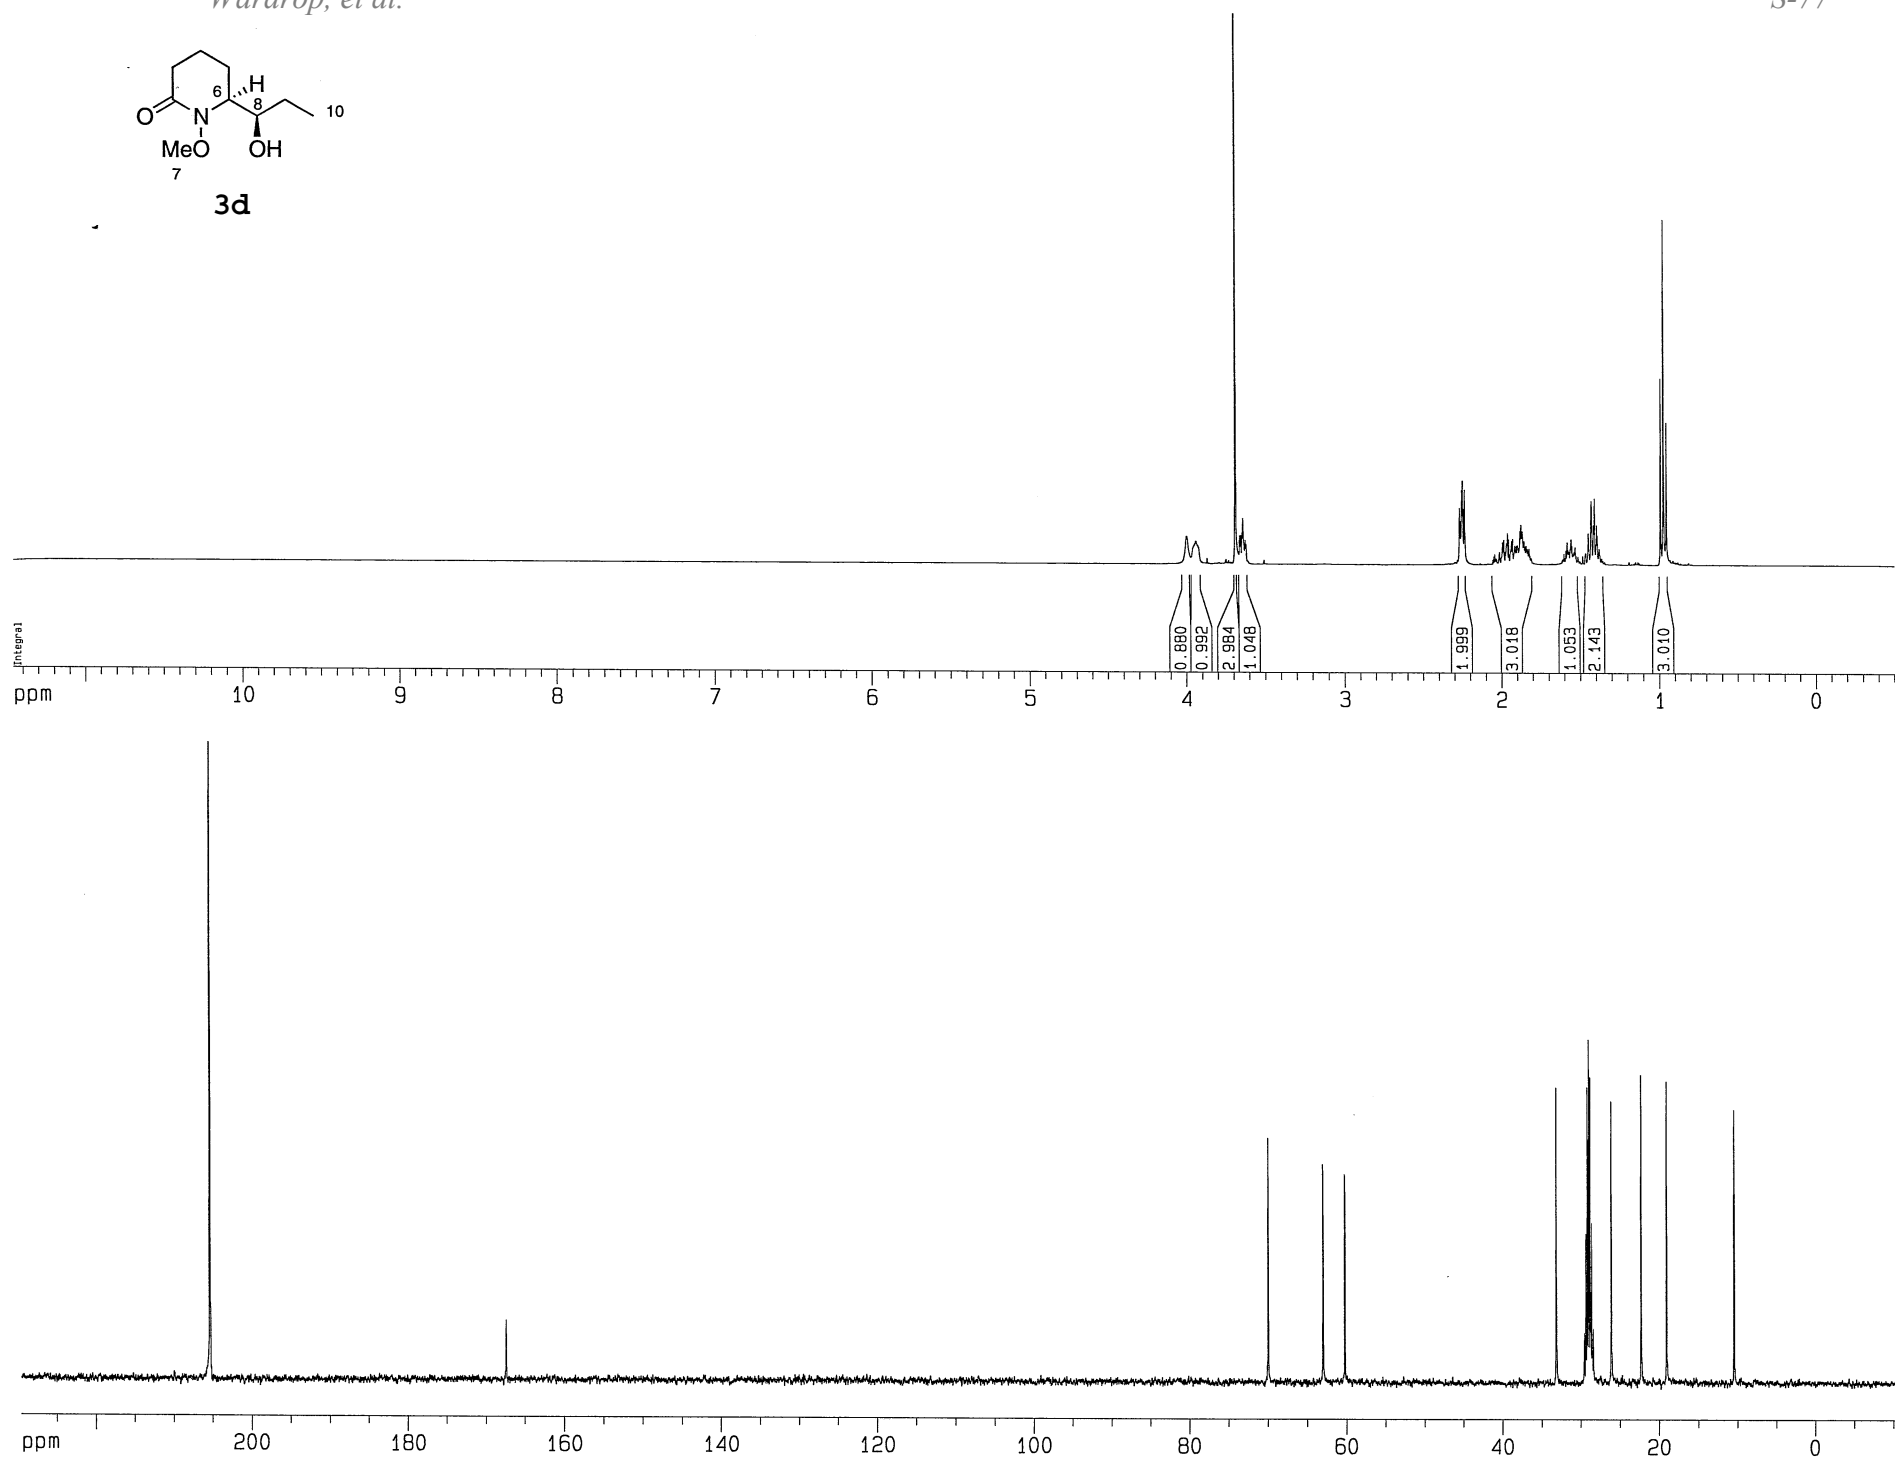

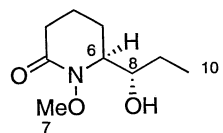

3e

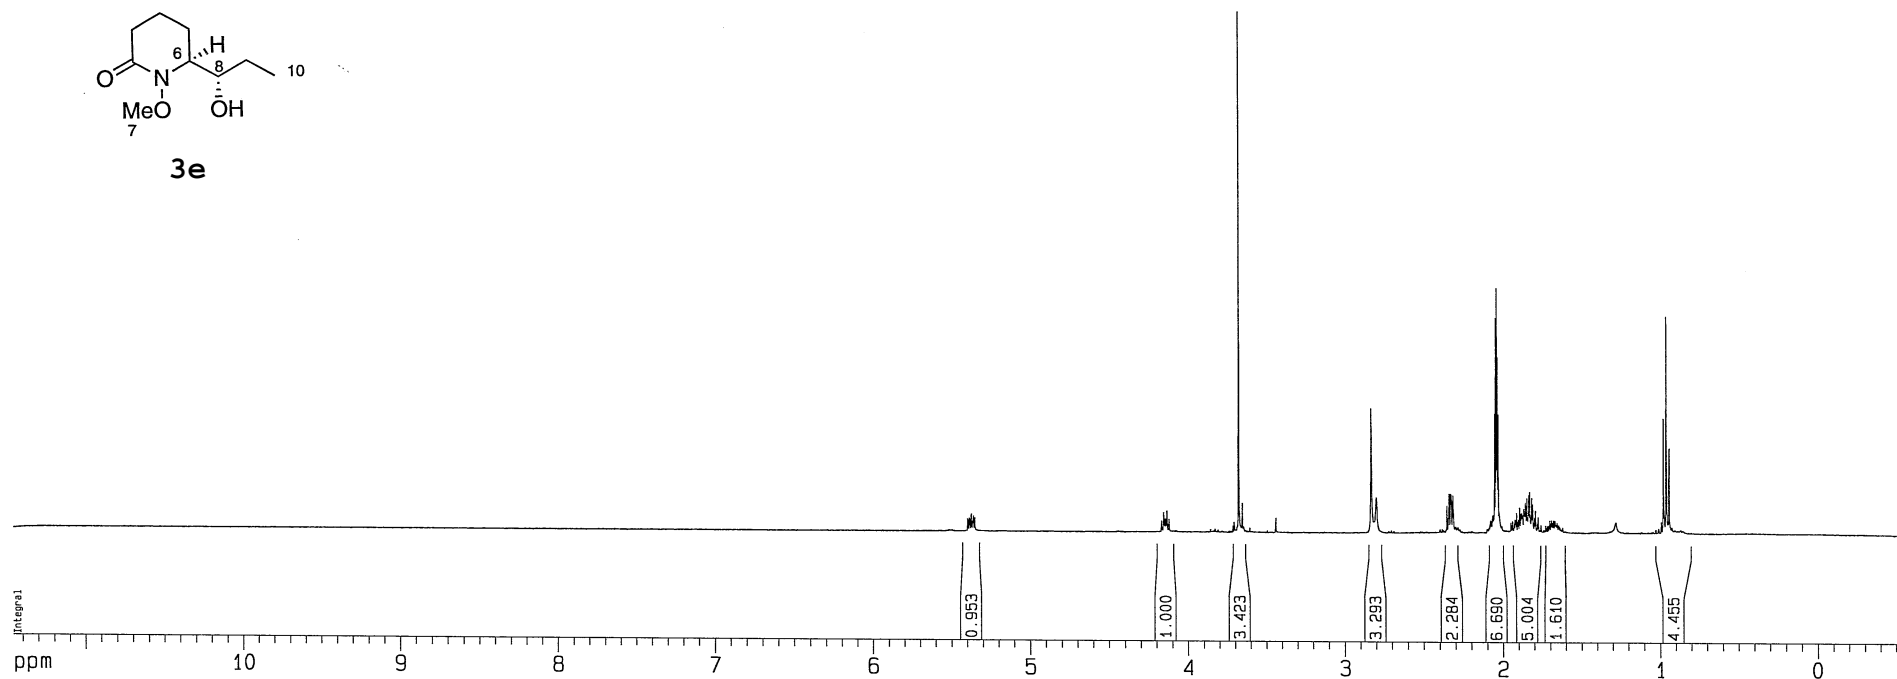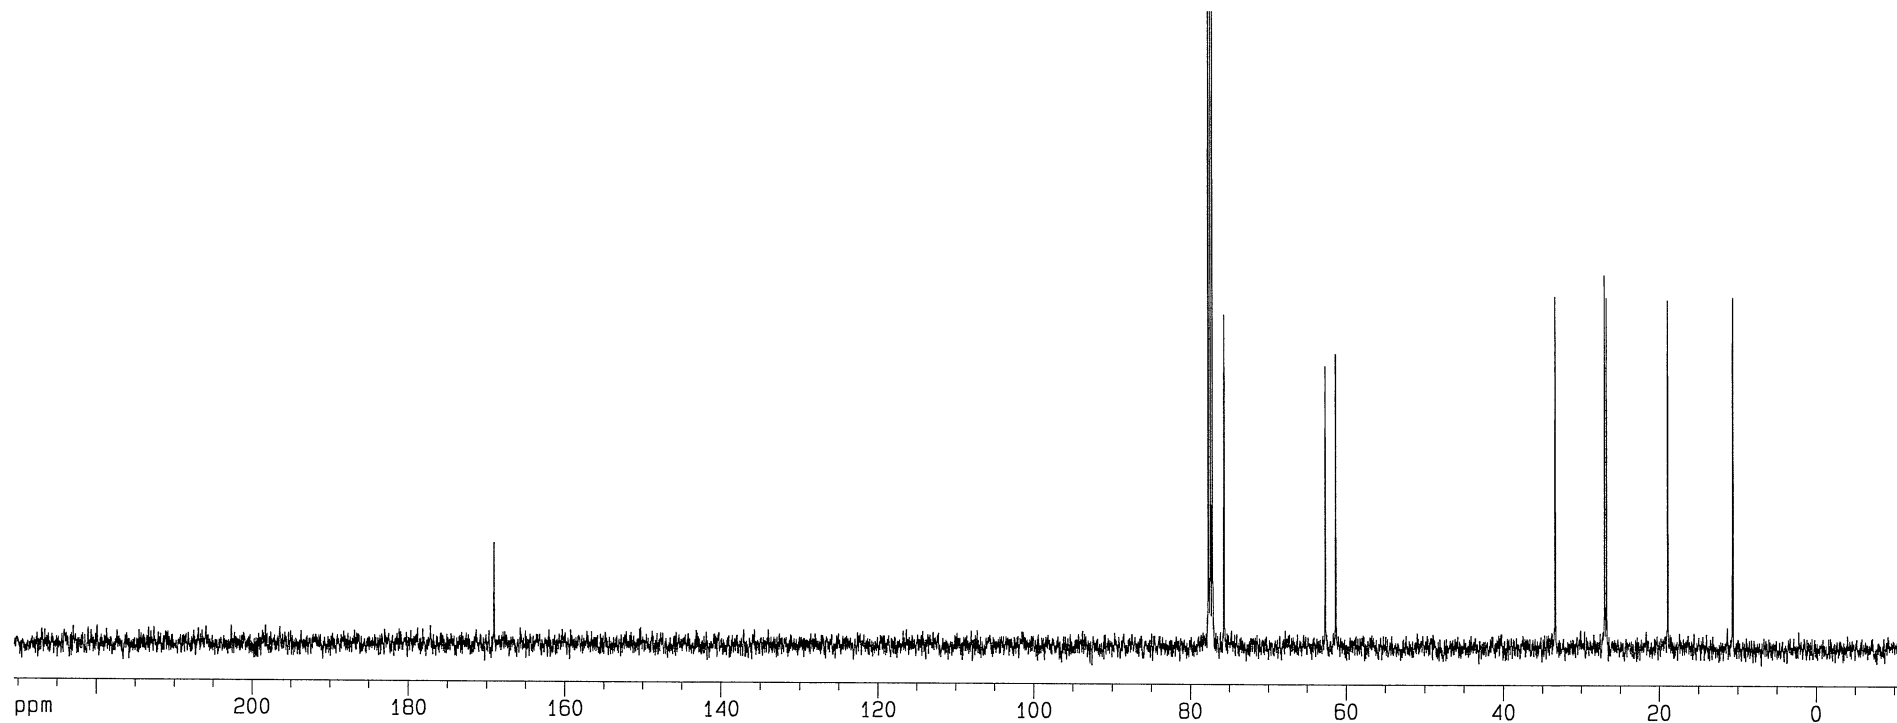

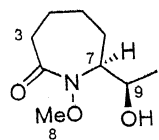**3f**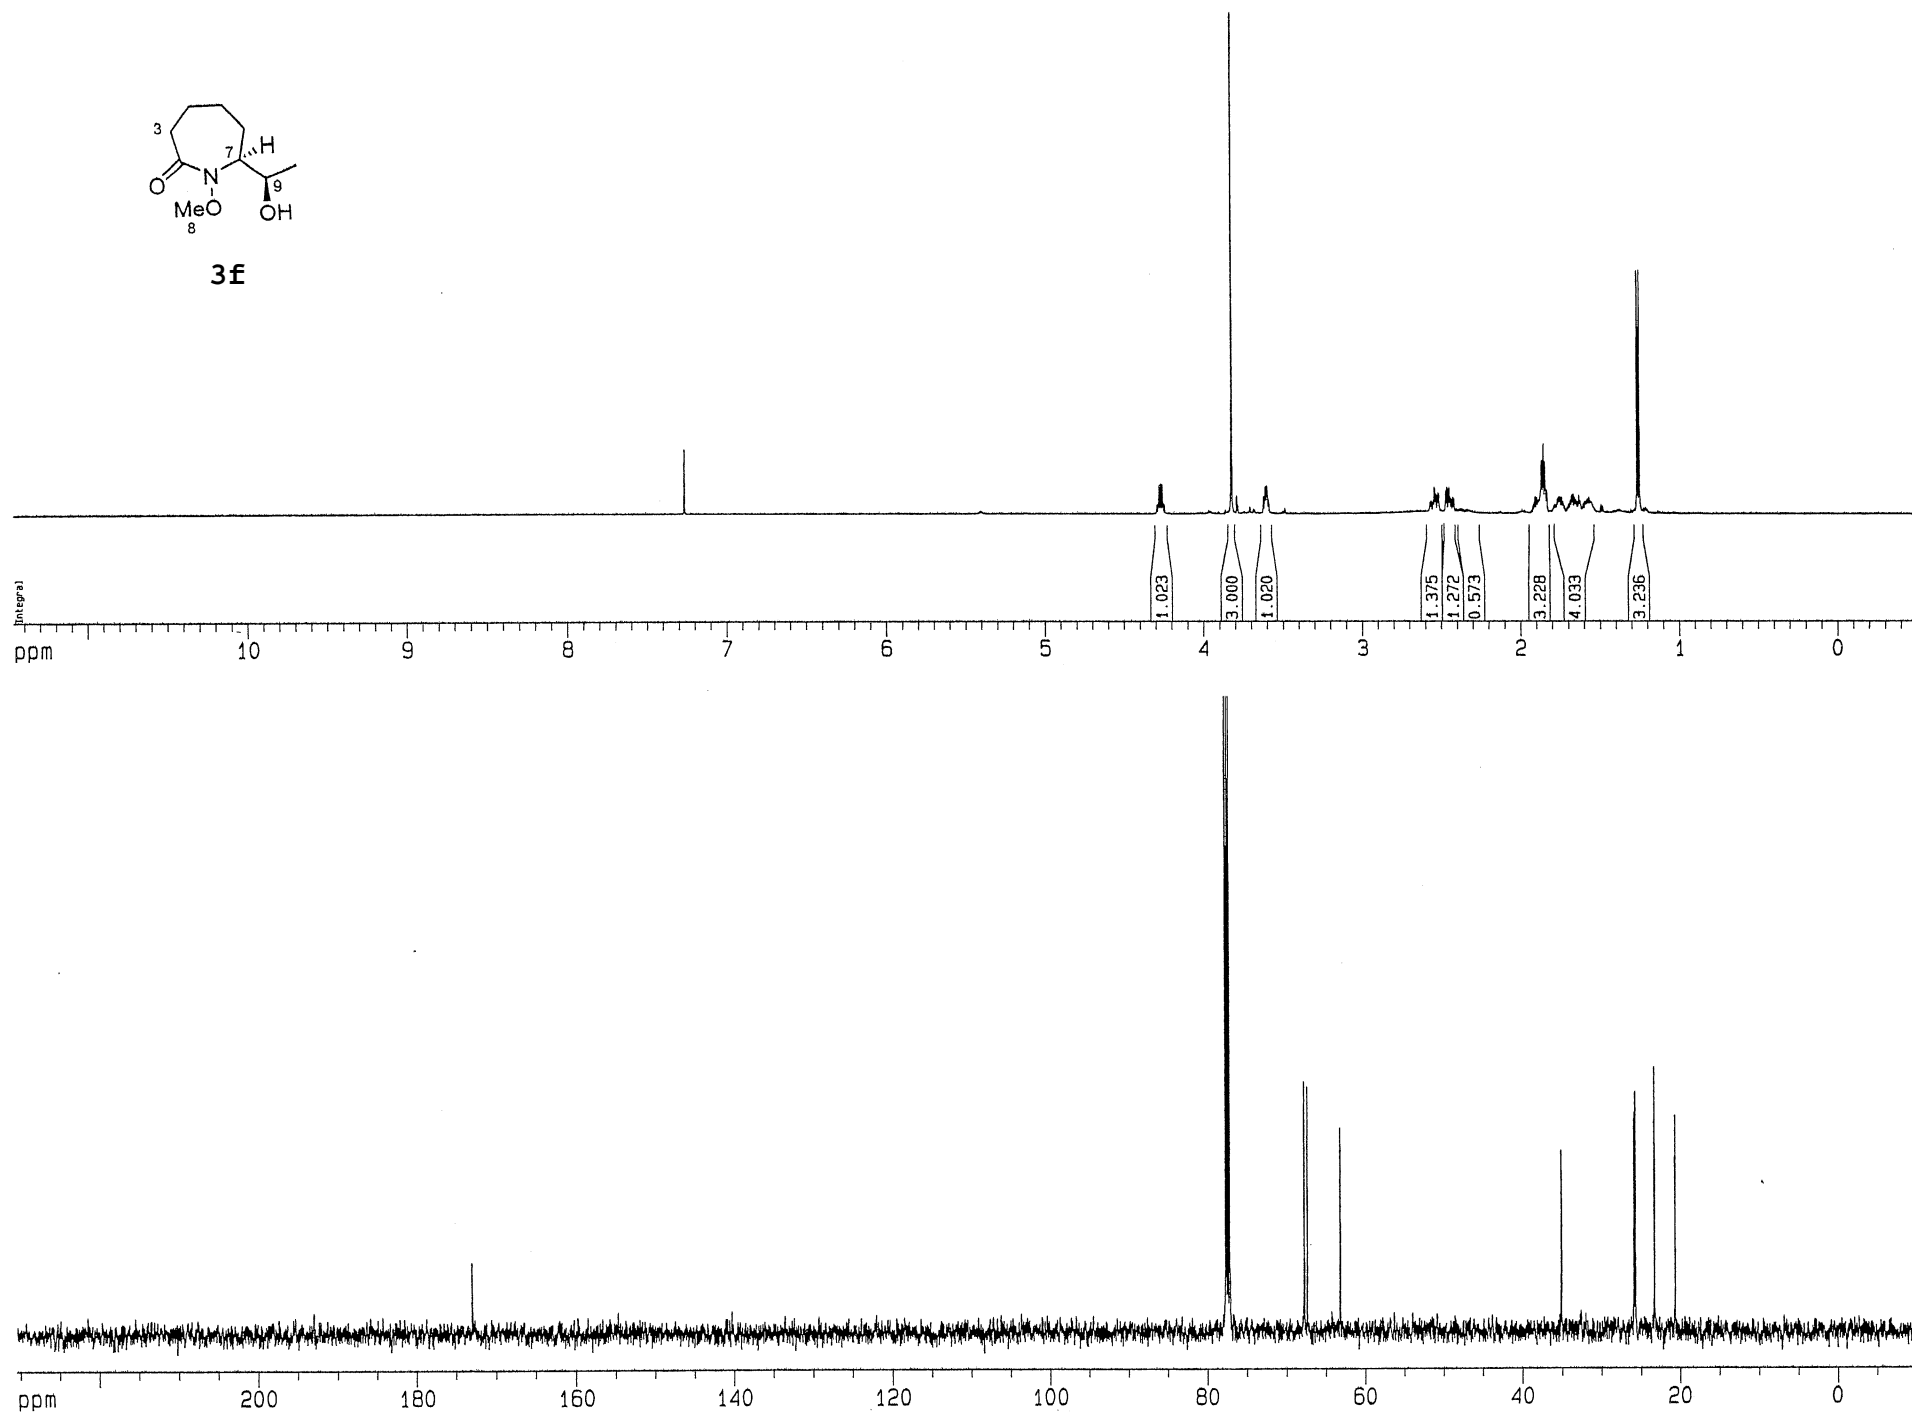



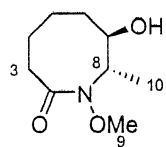

12

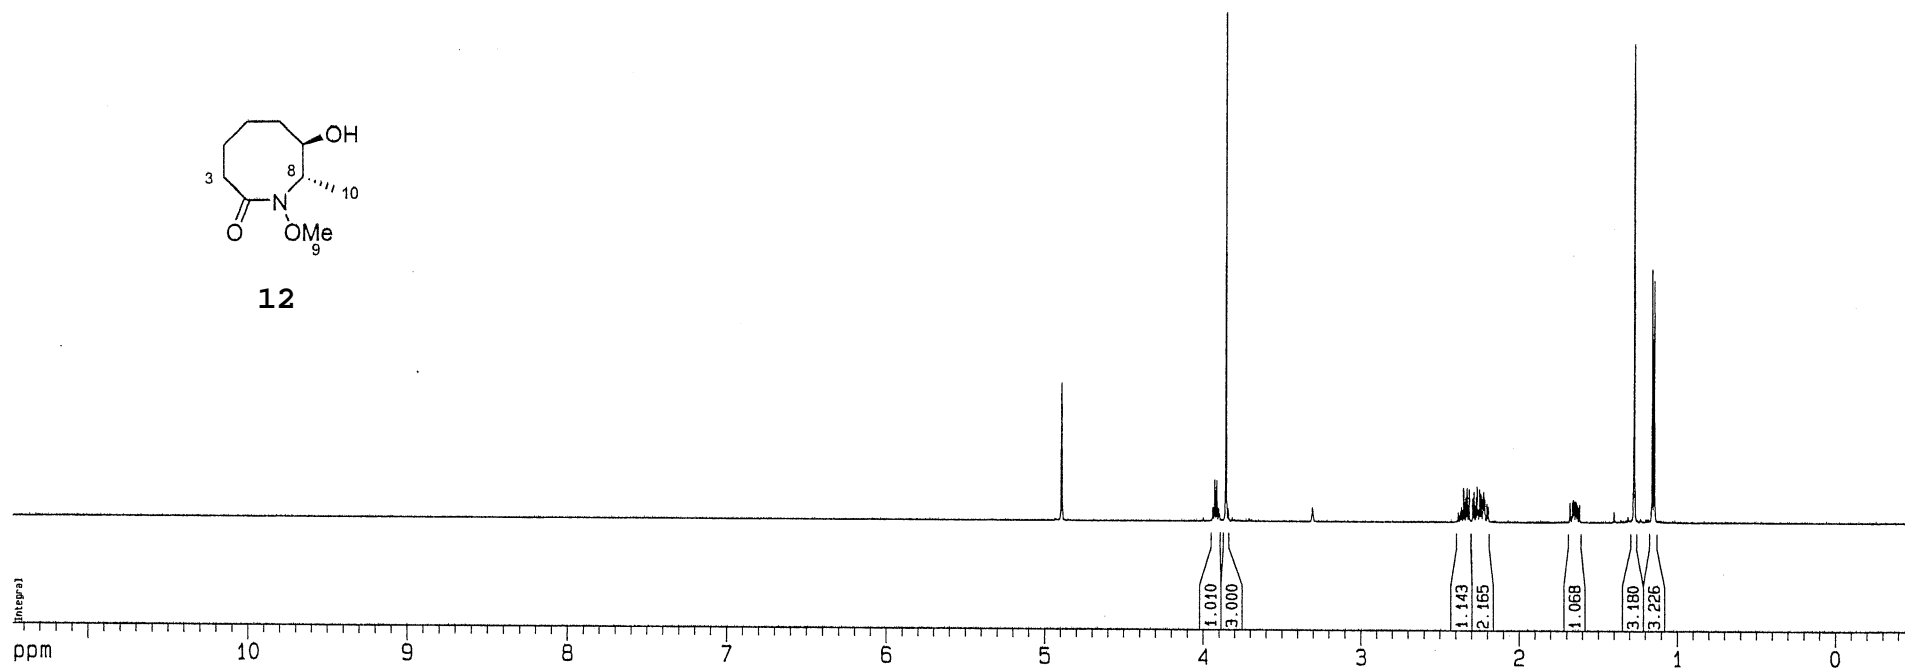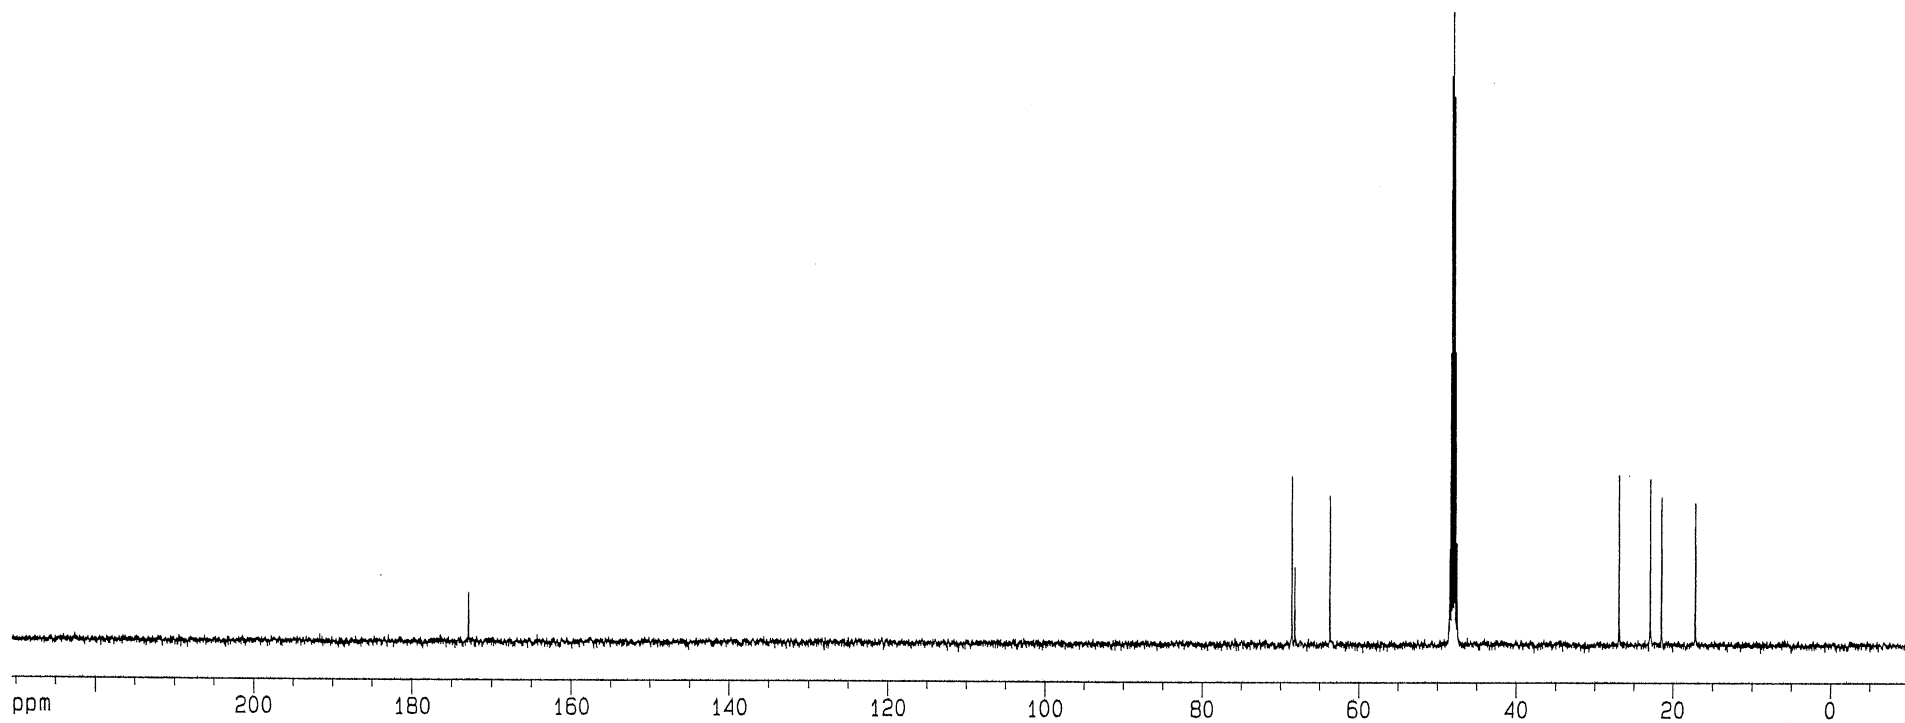

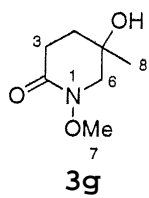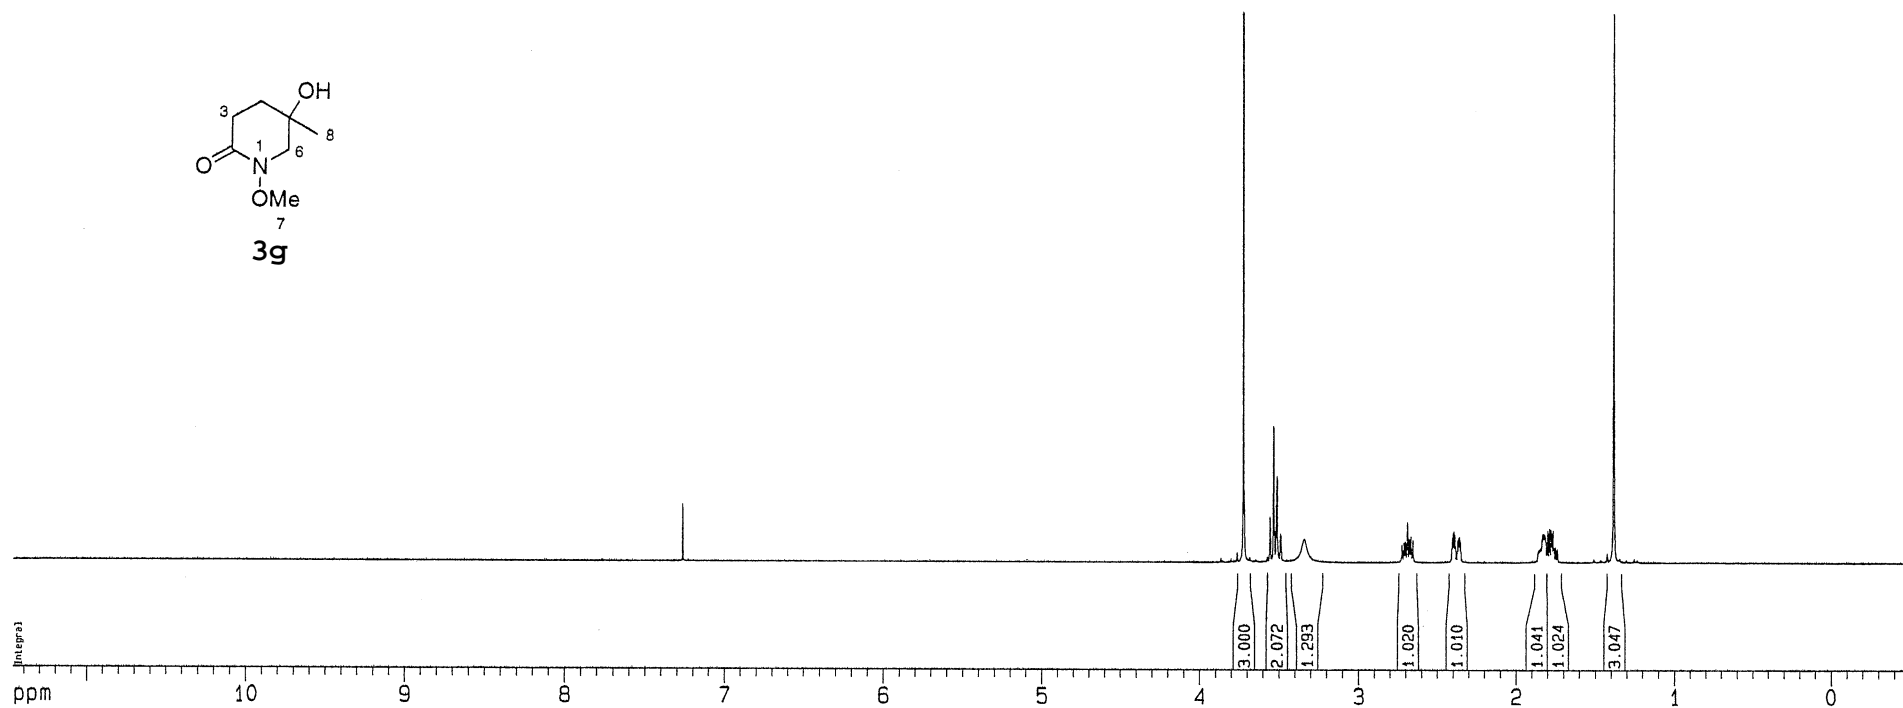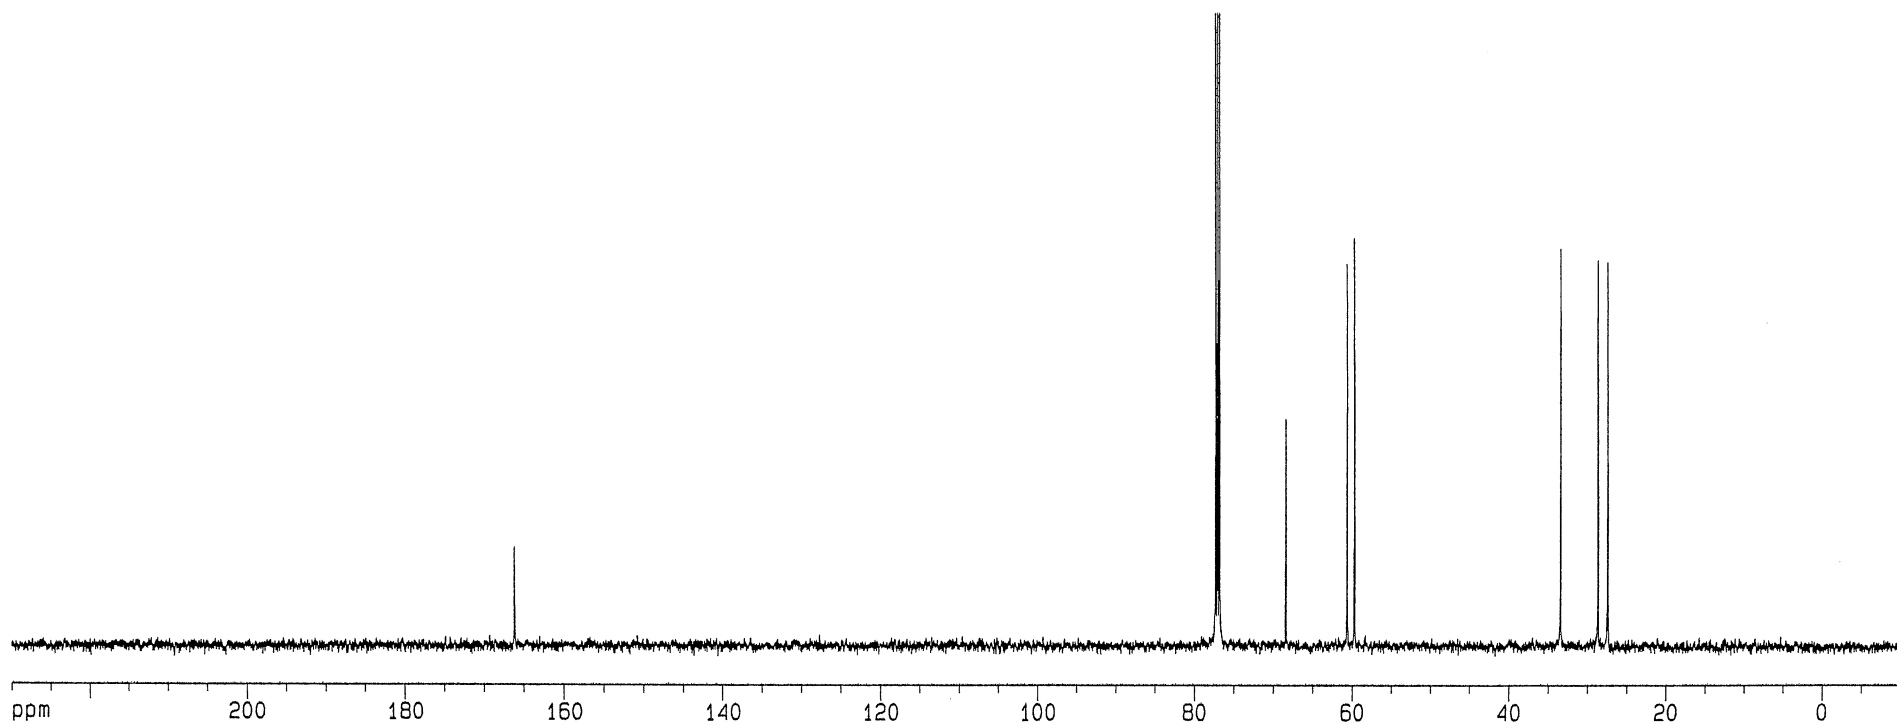

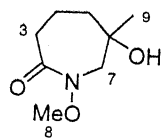**3h**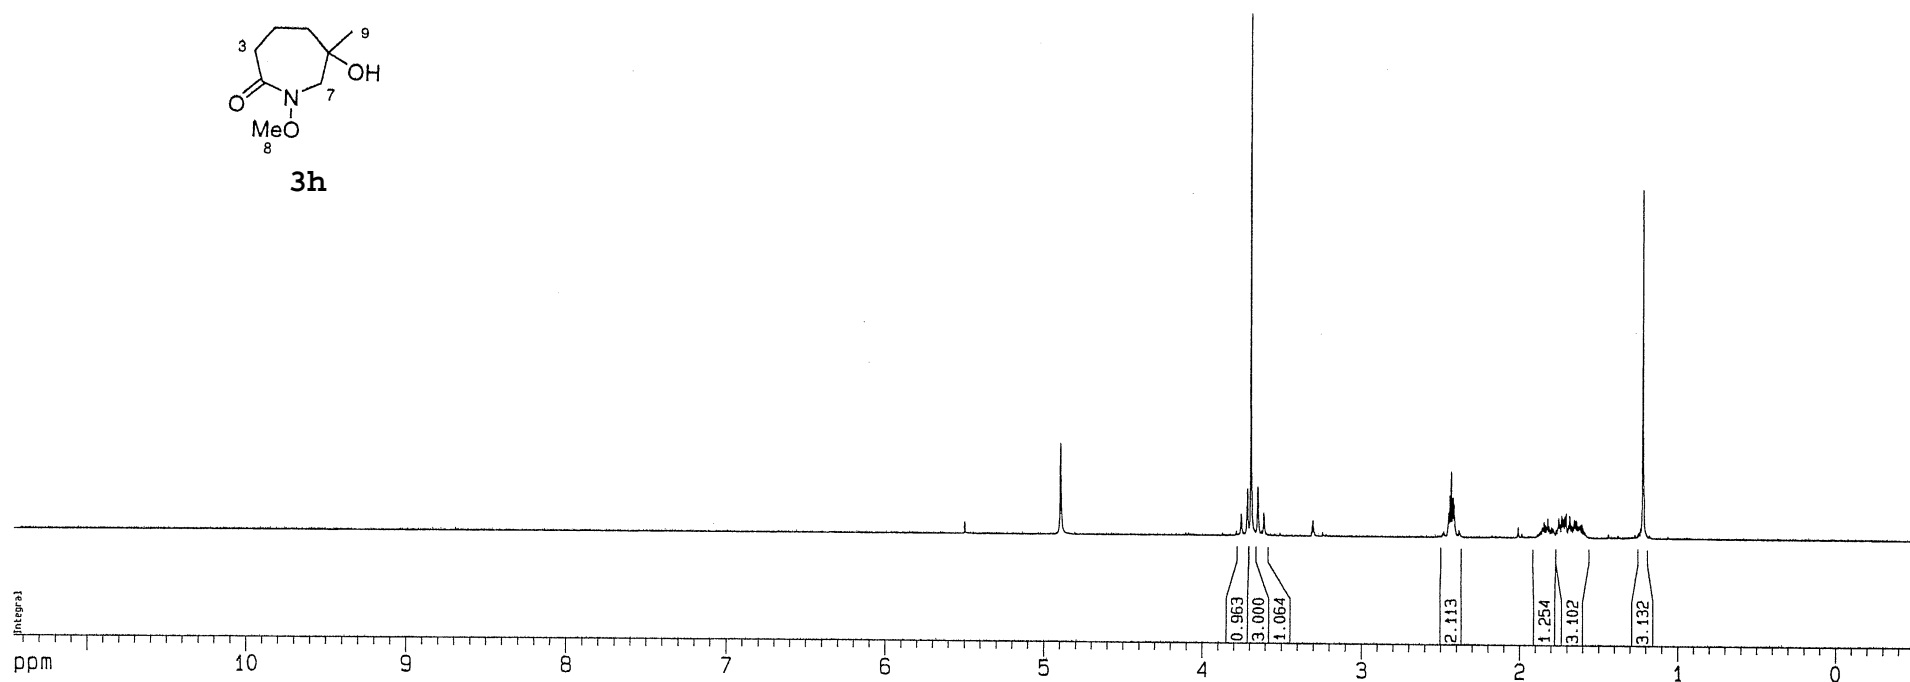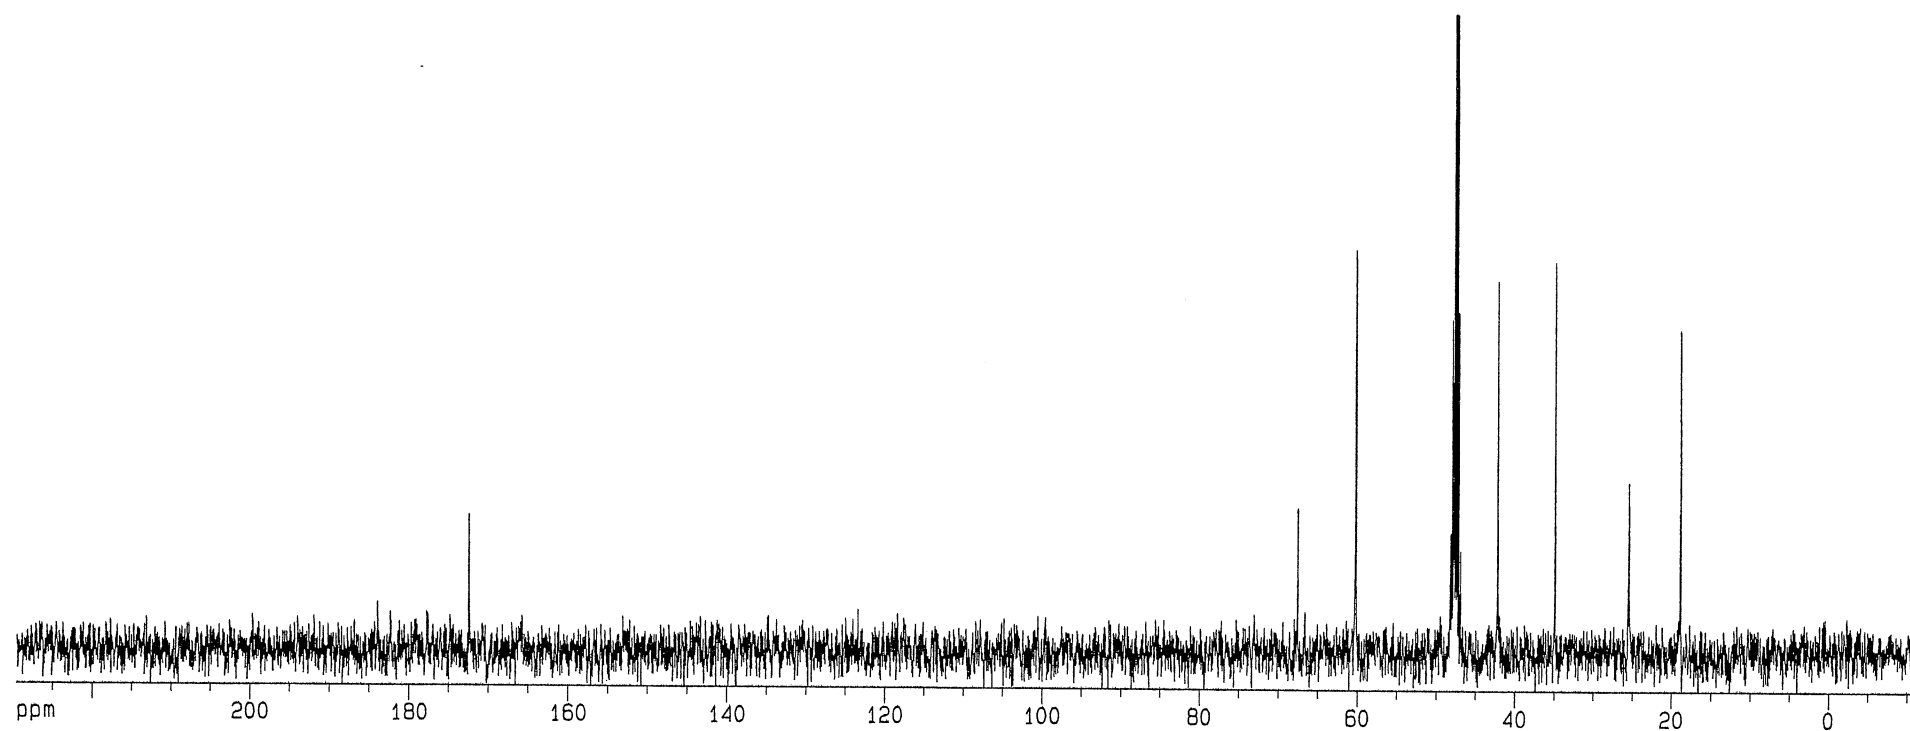

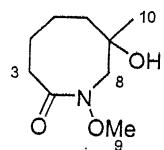**3i**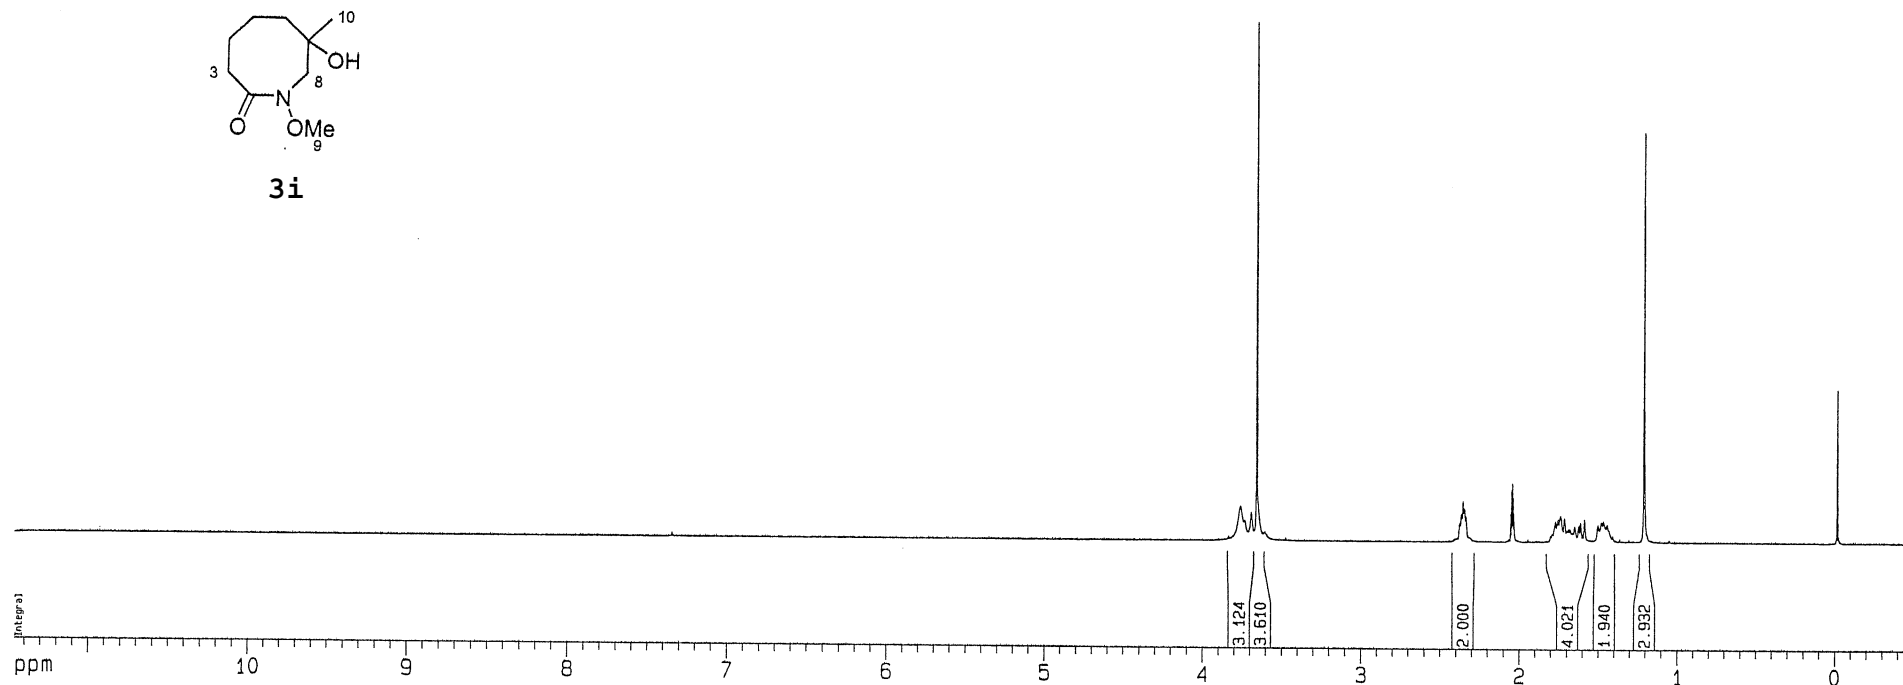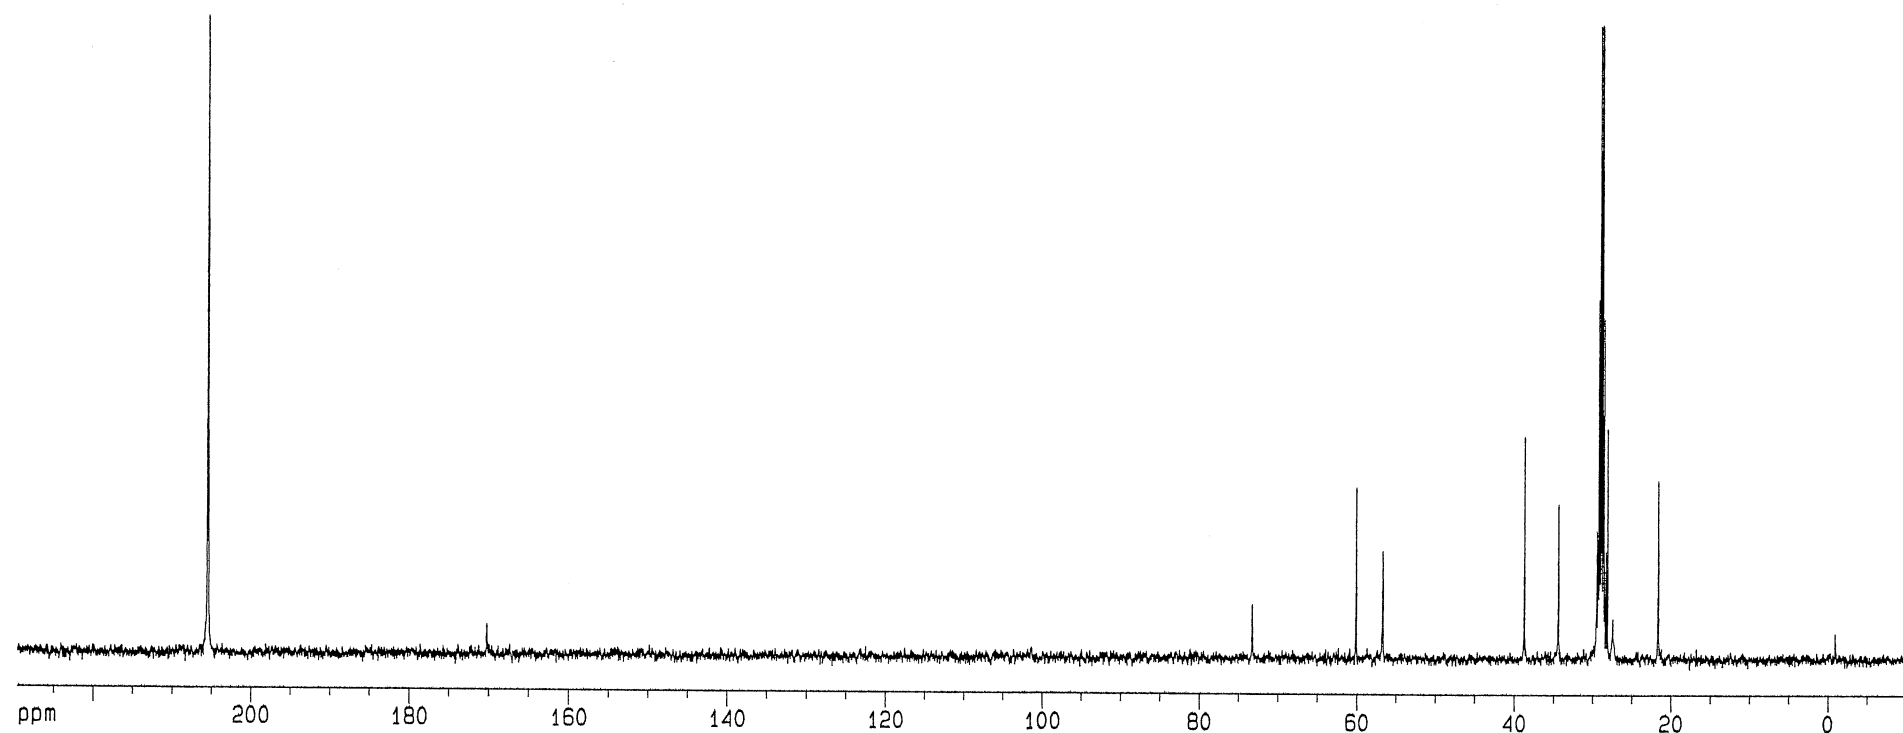

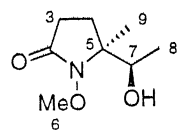

3j

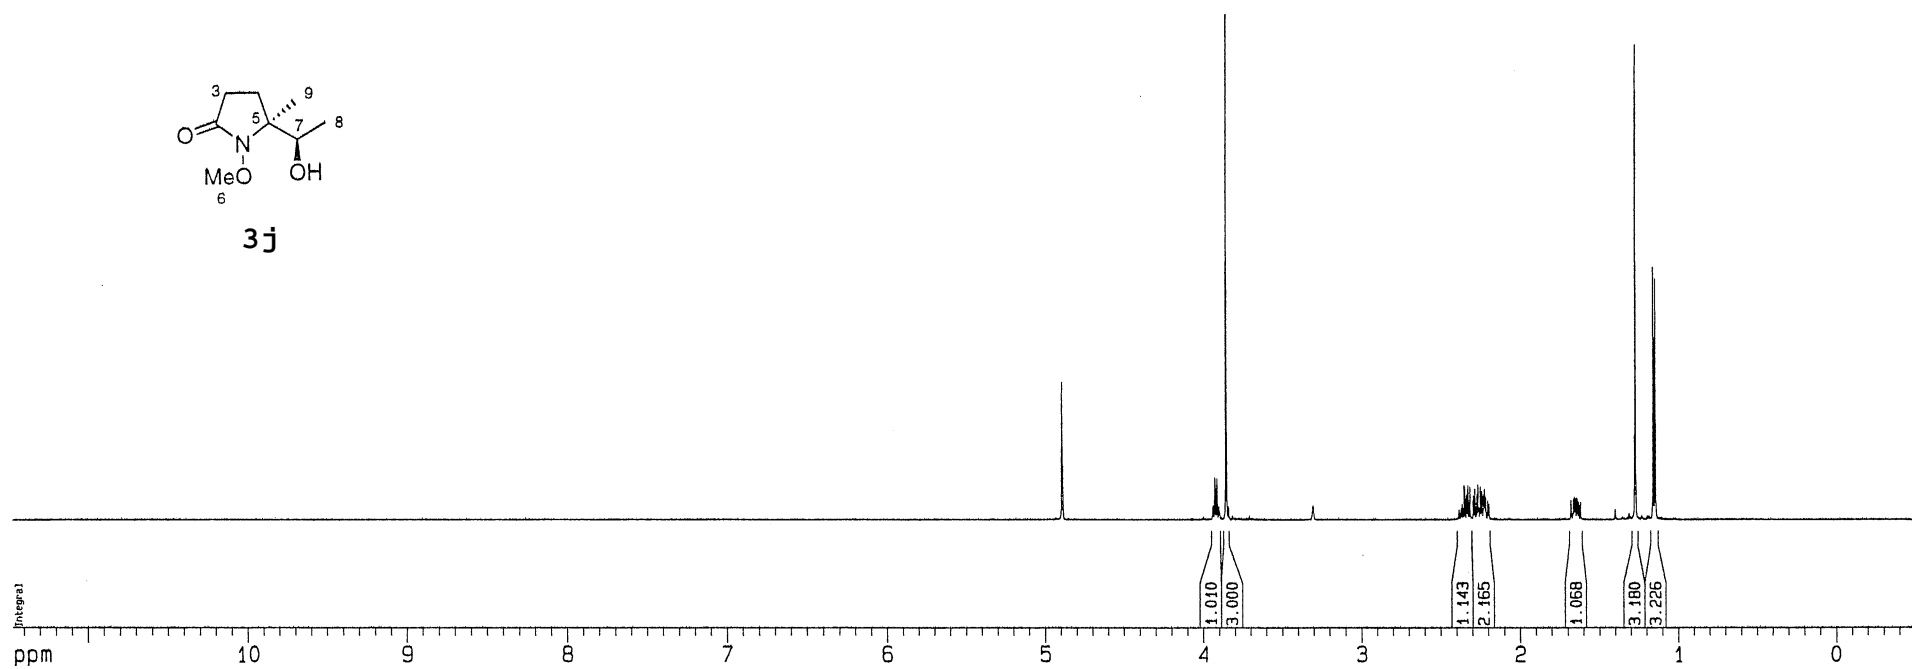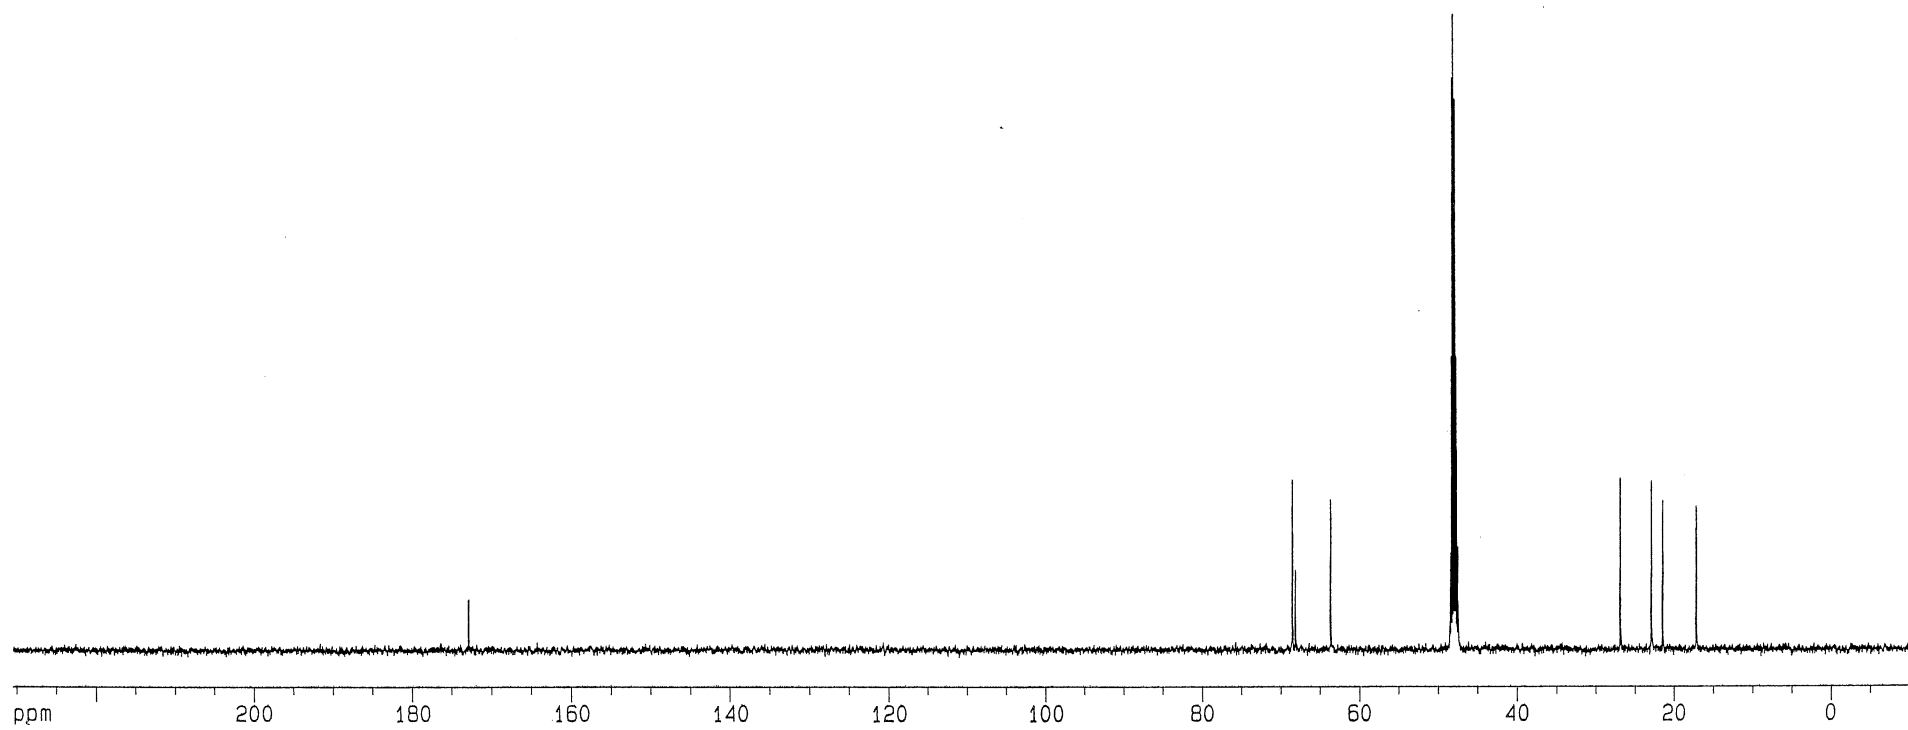

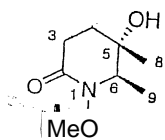**3k**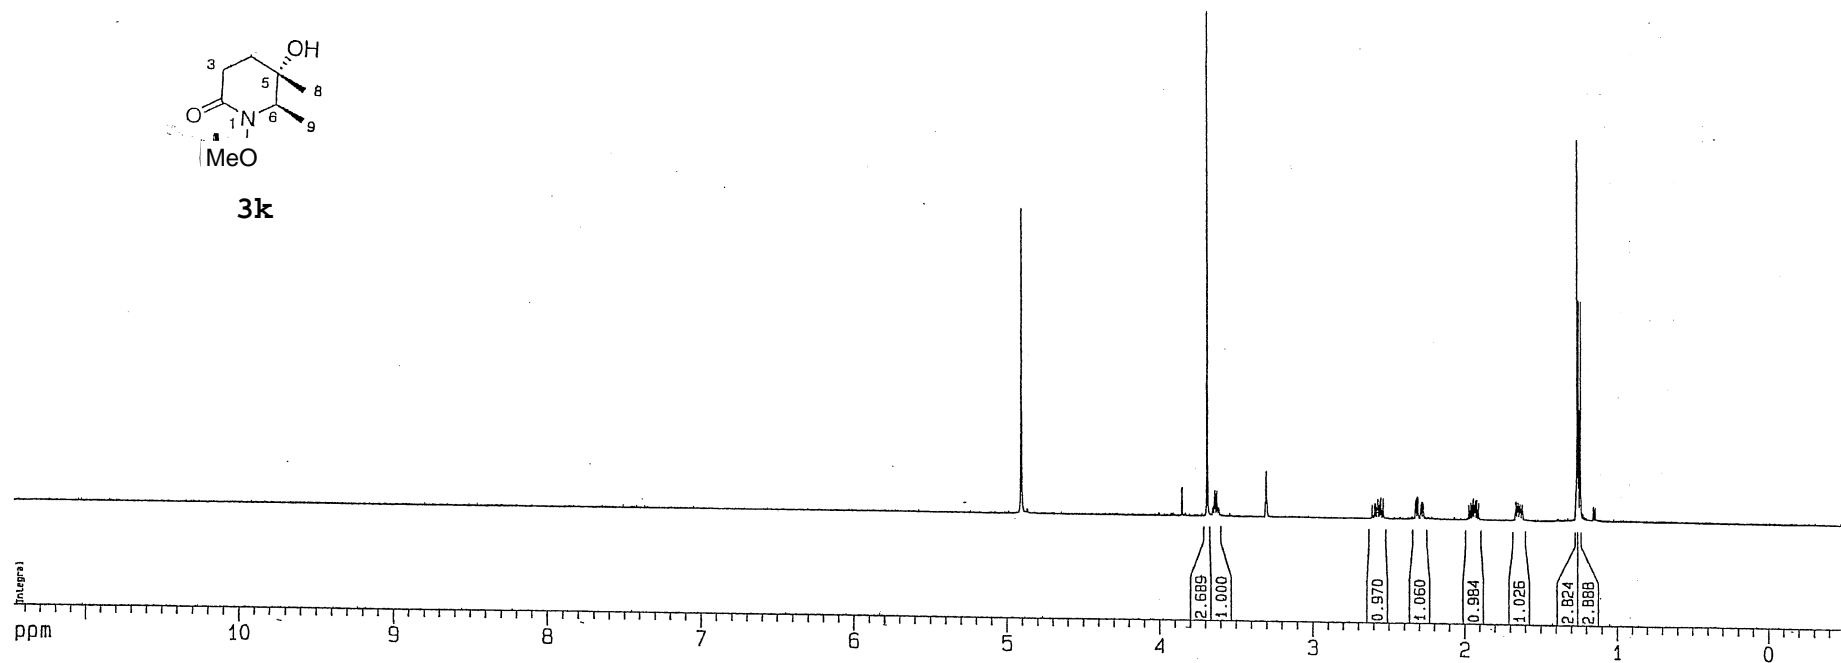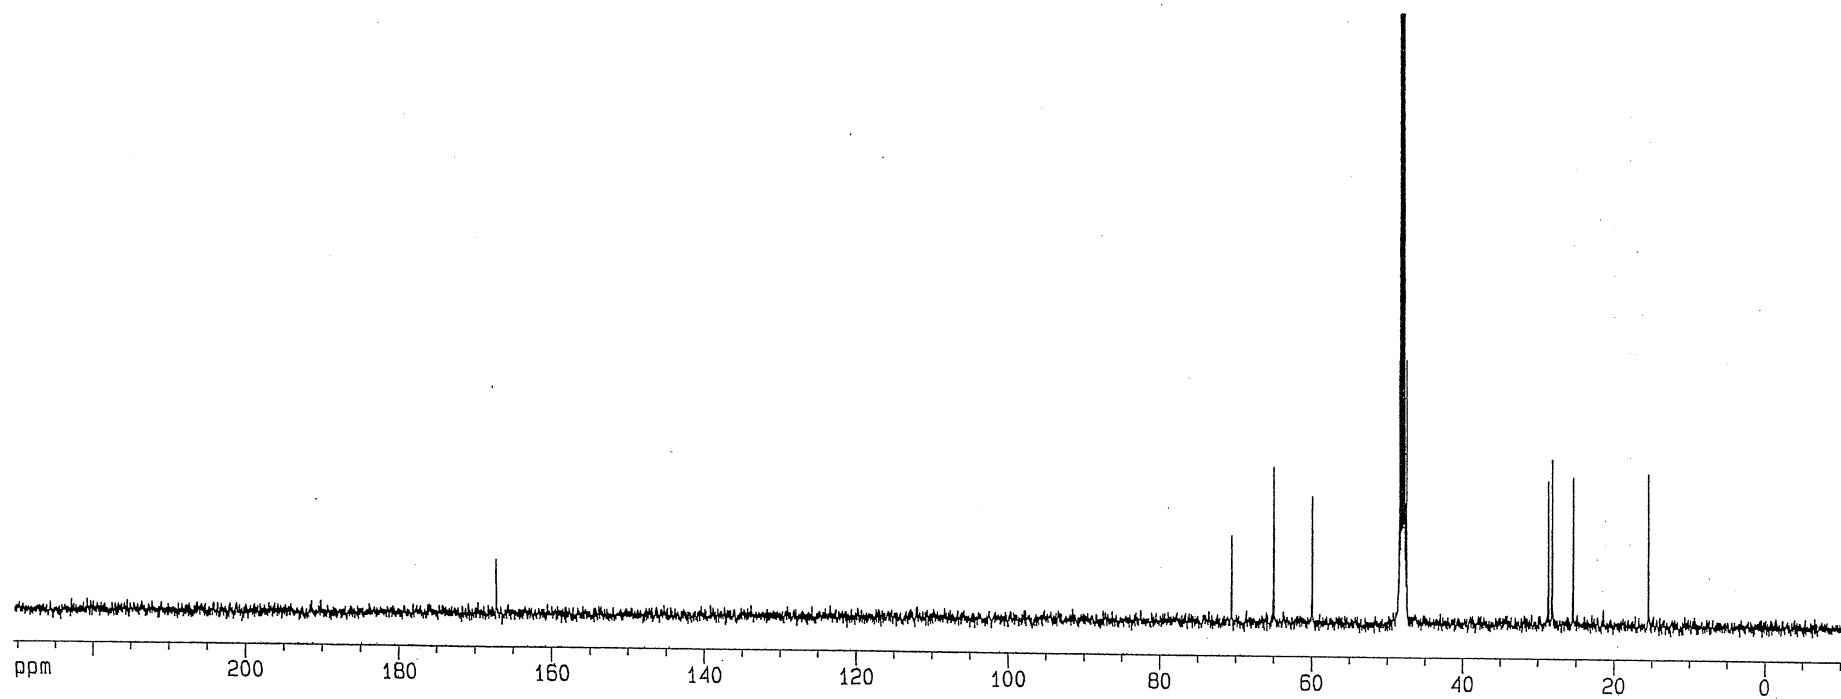

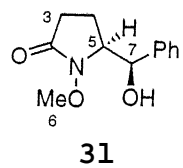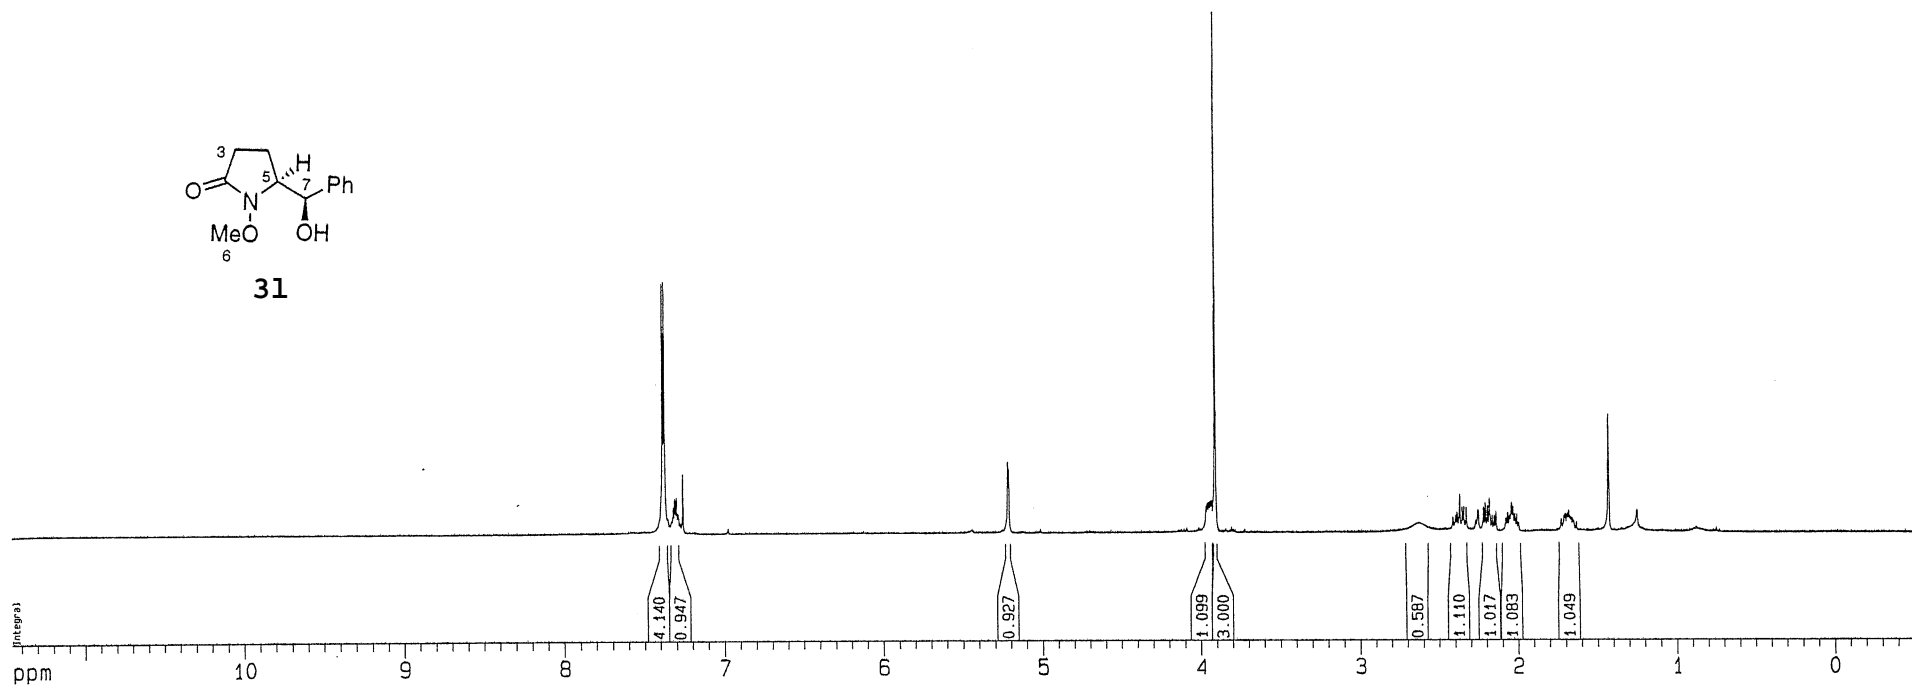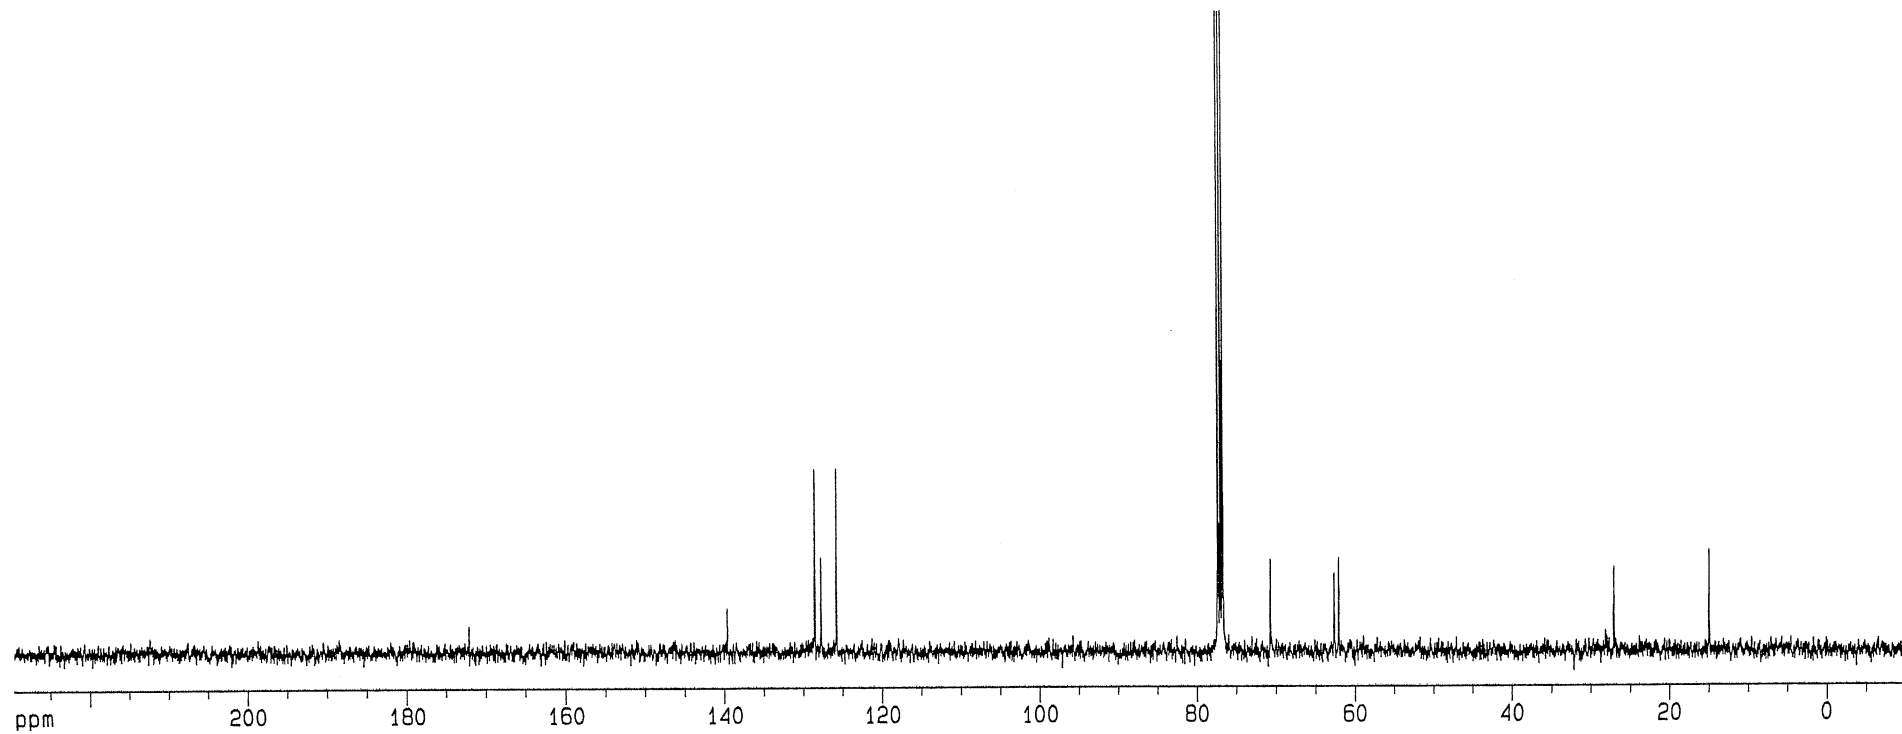





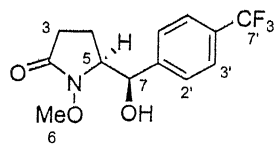**3m**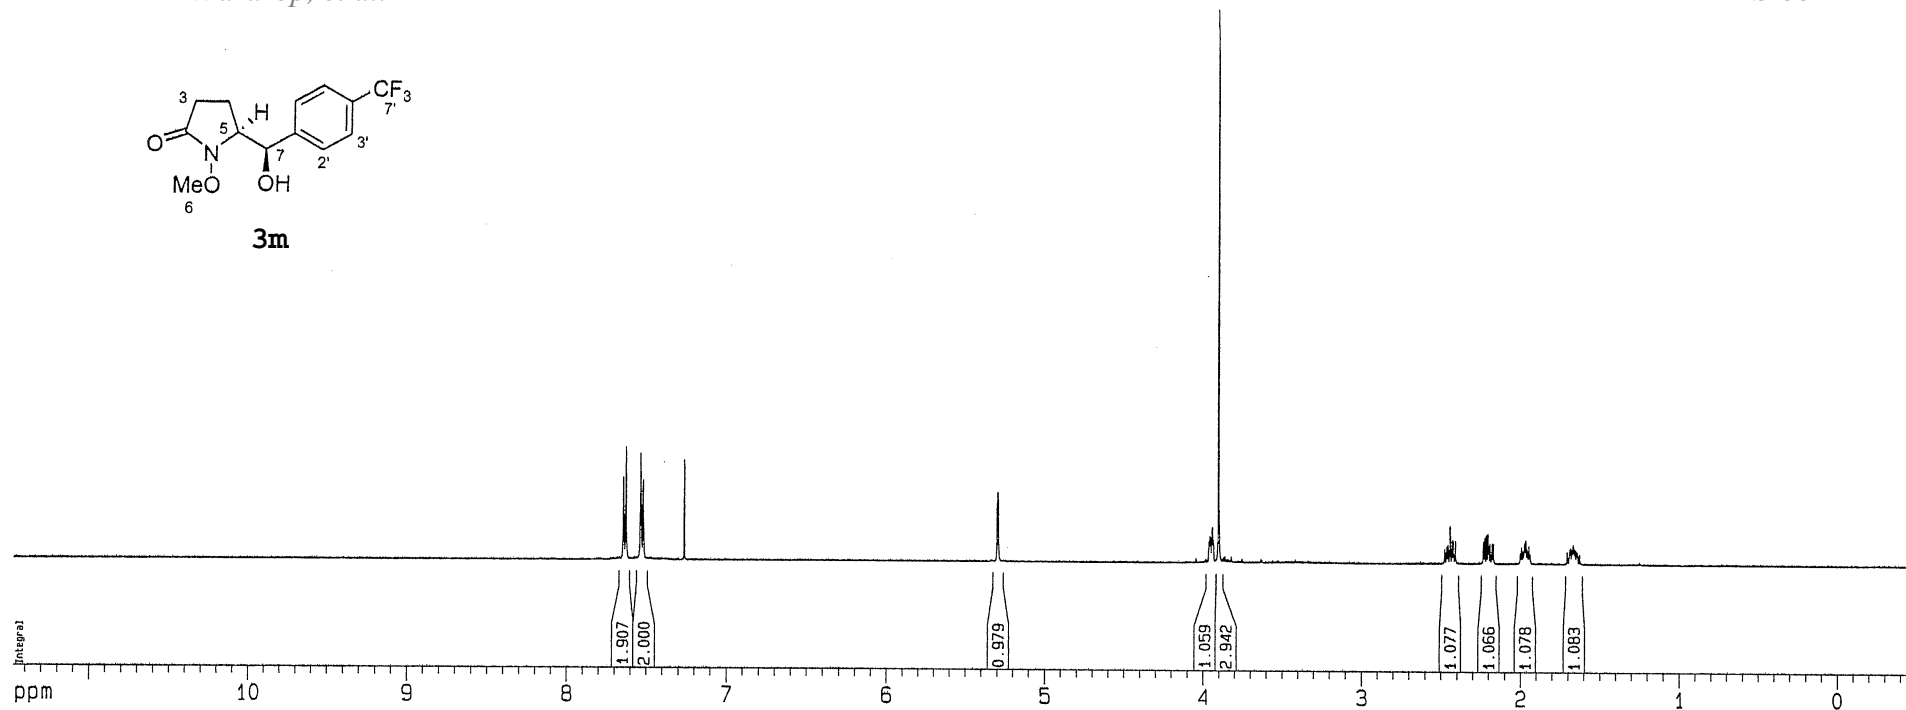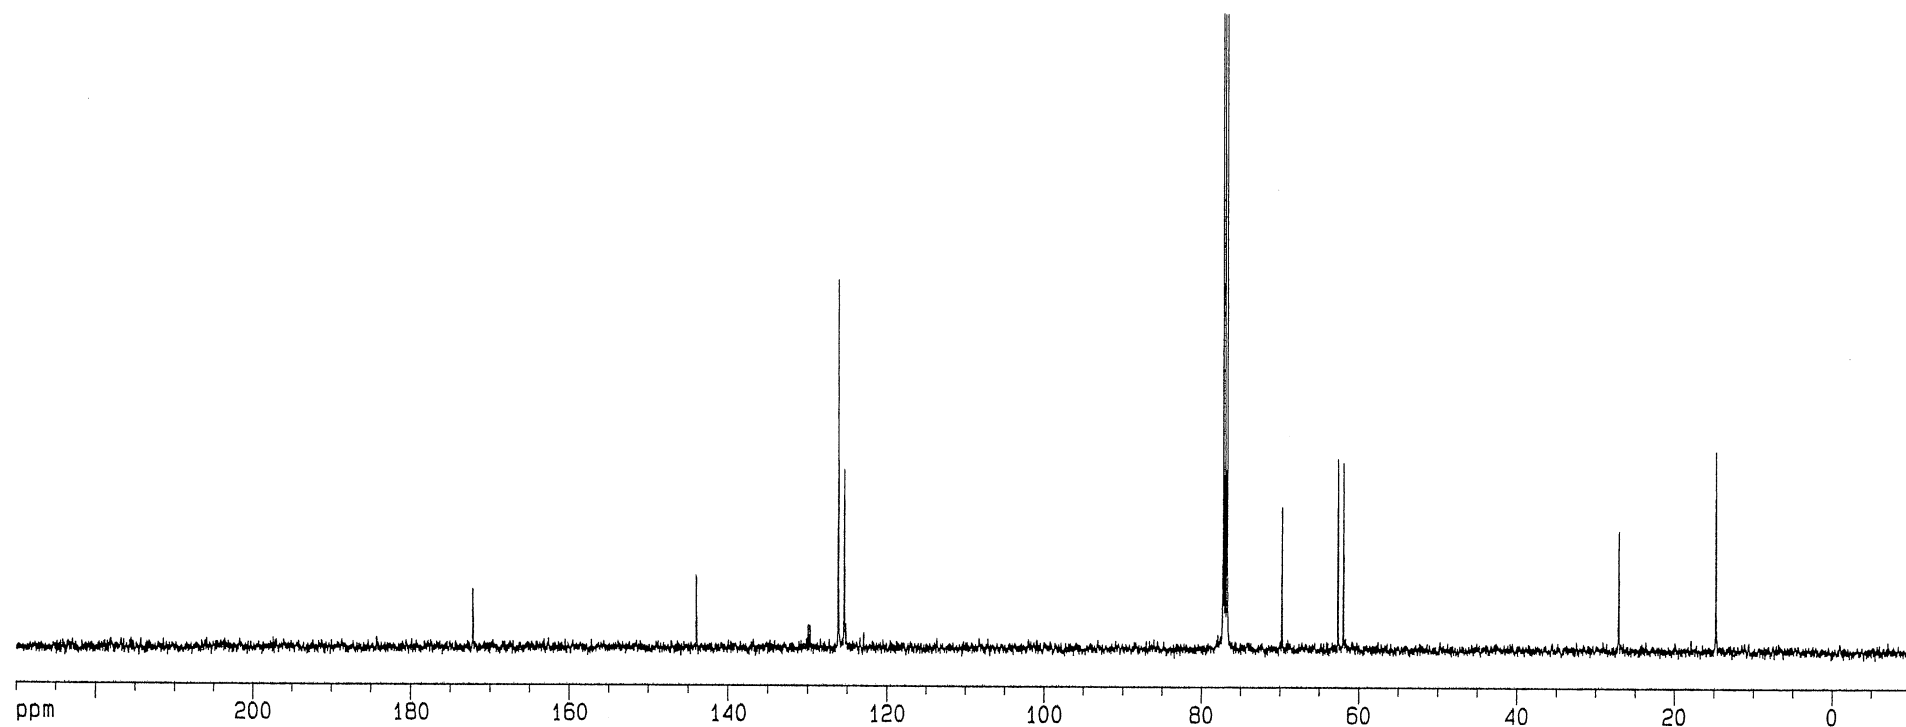

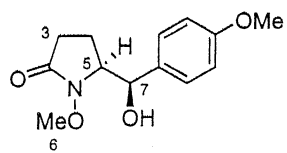**3n**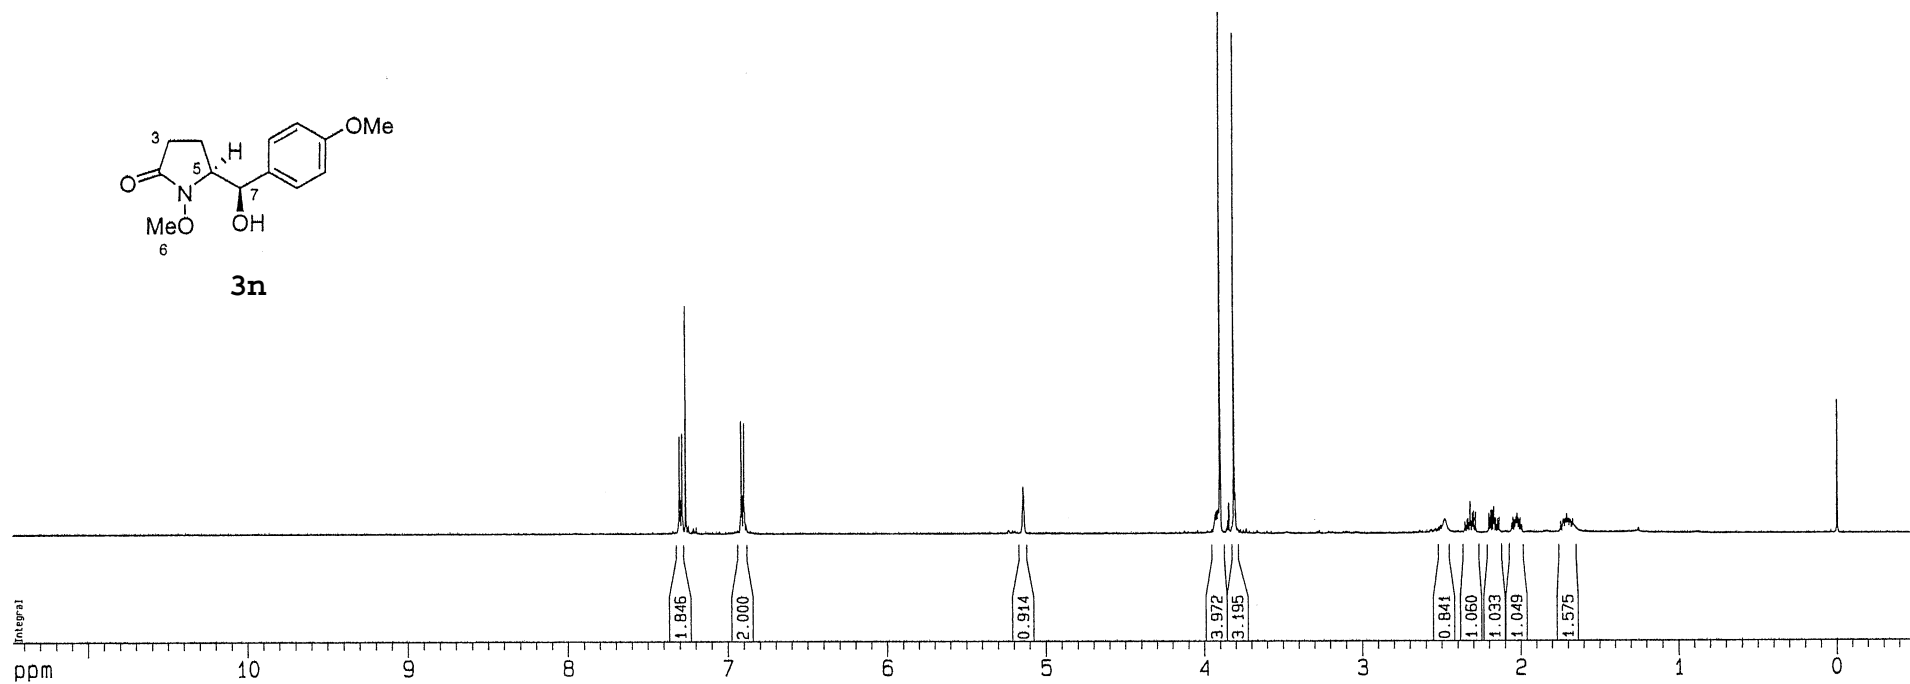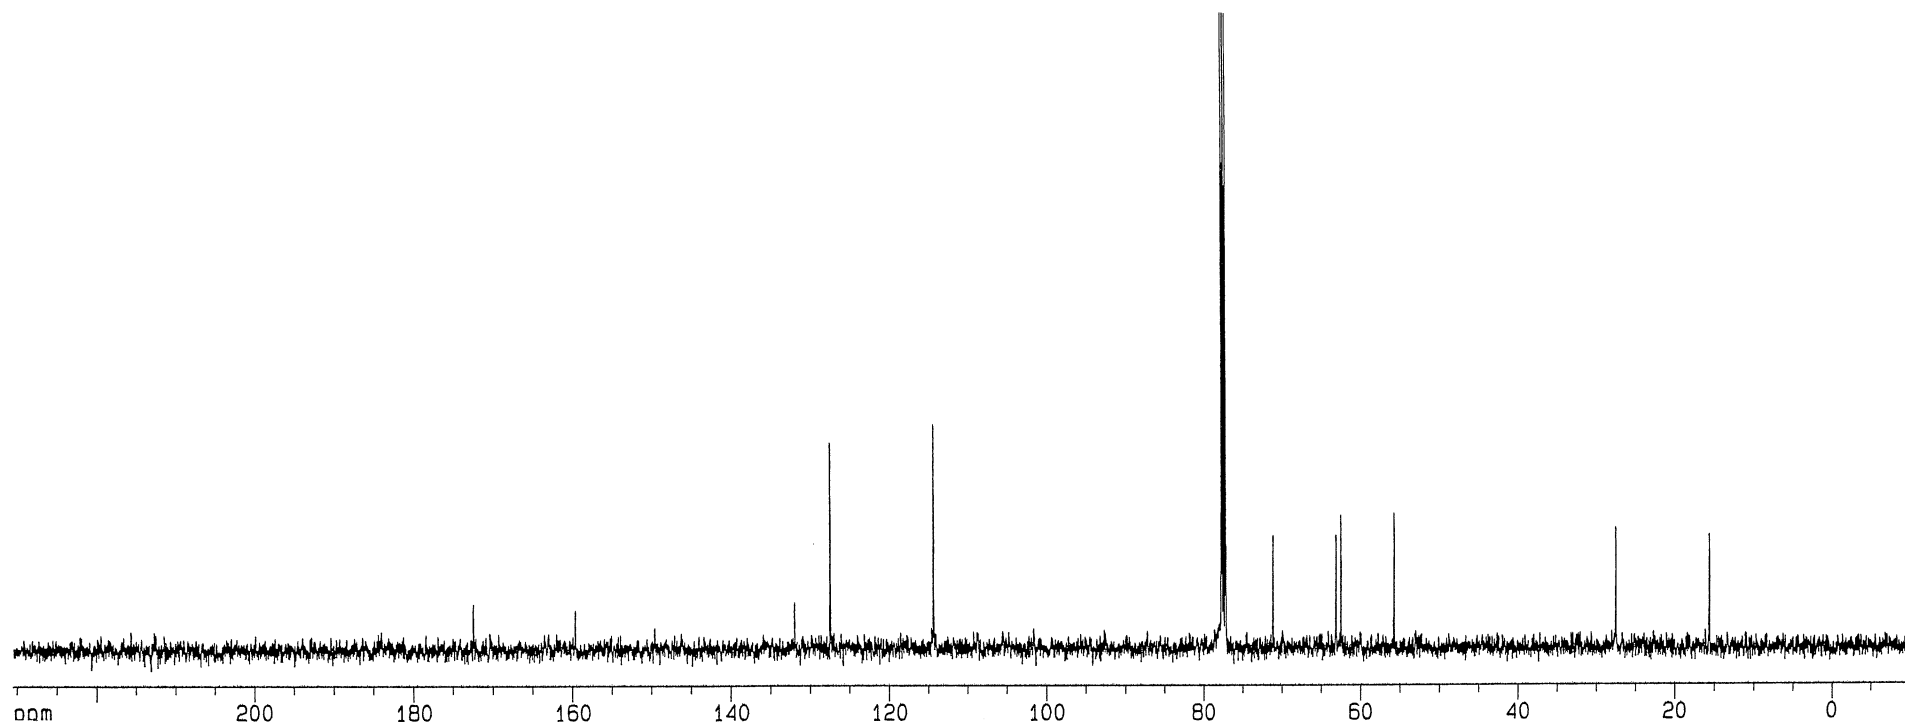

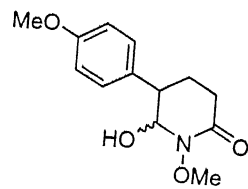

5

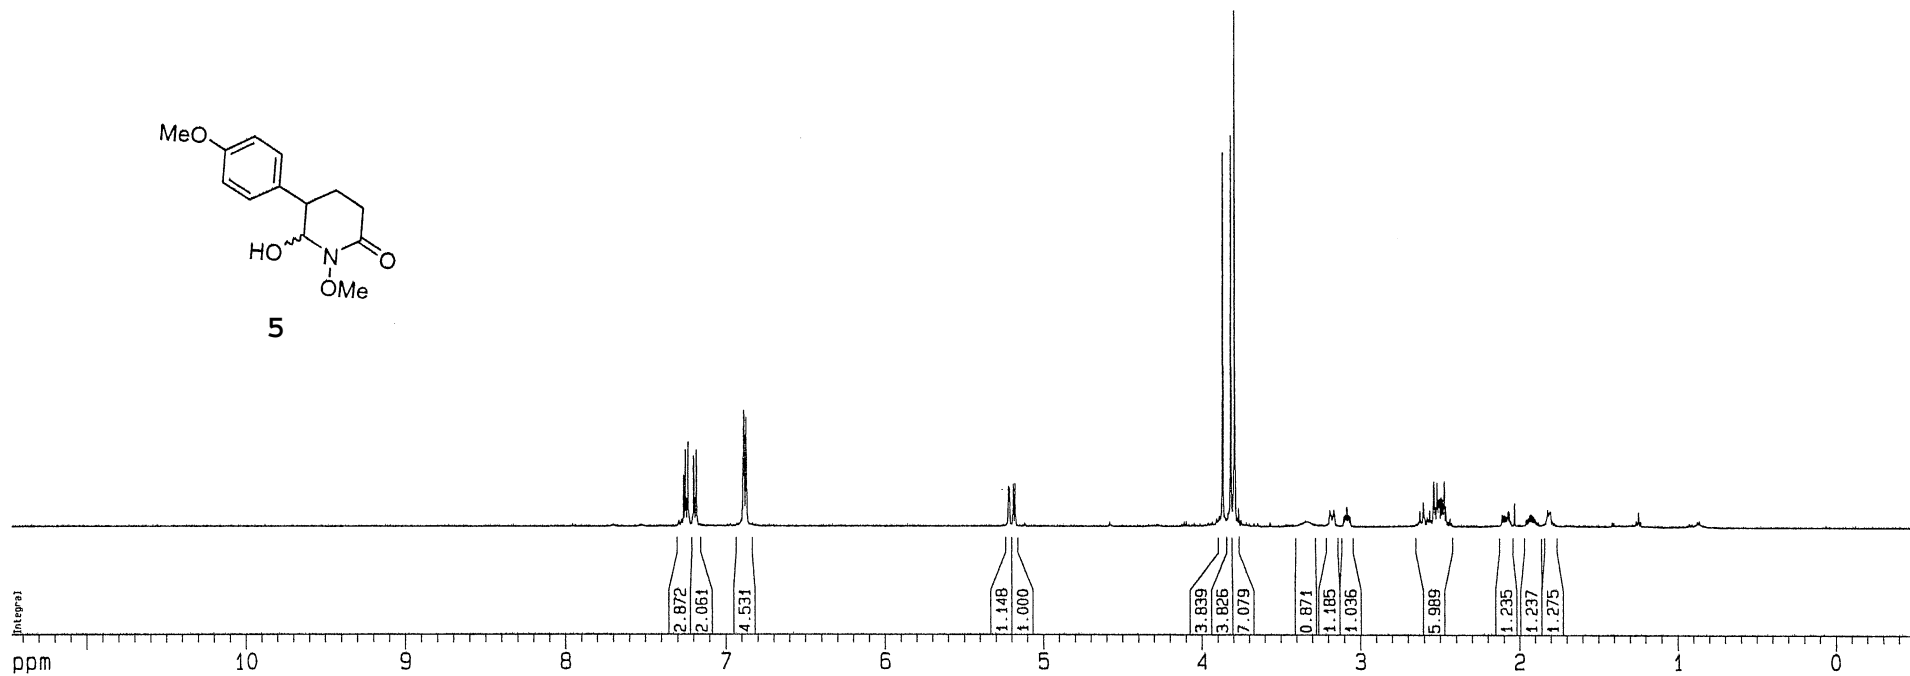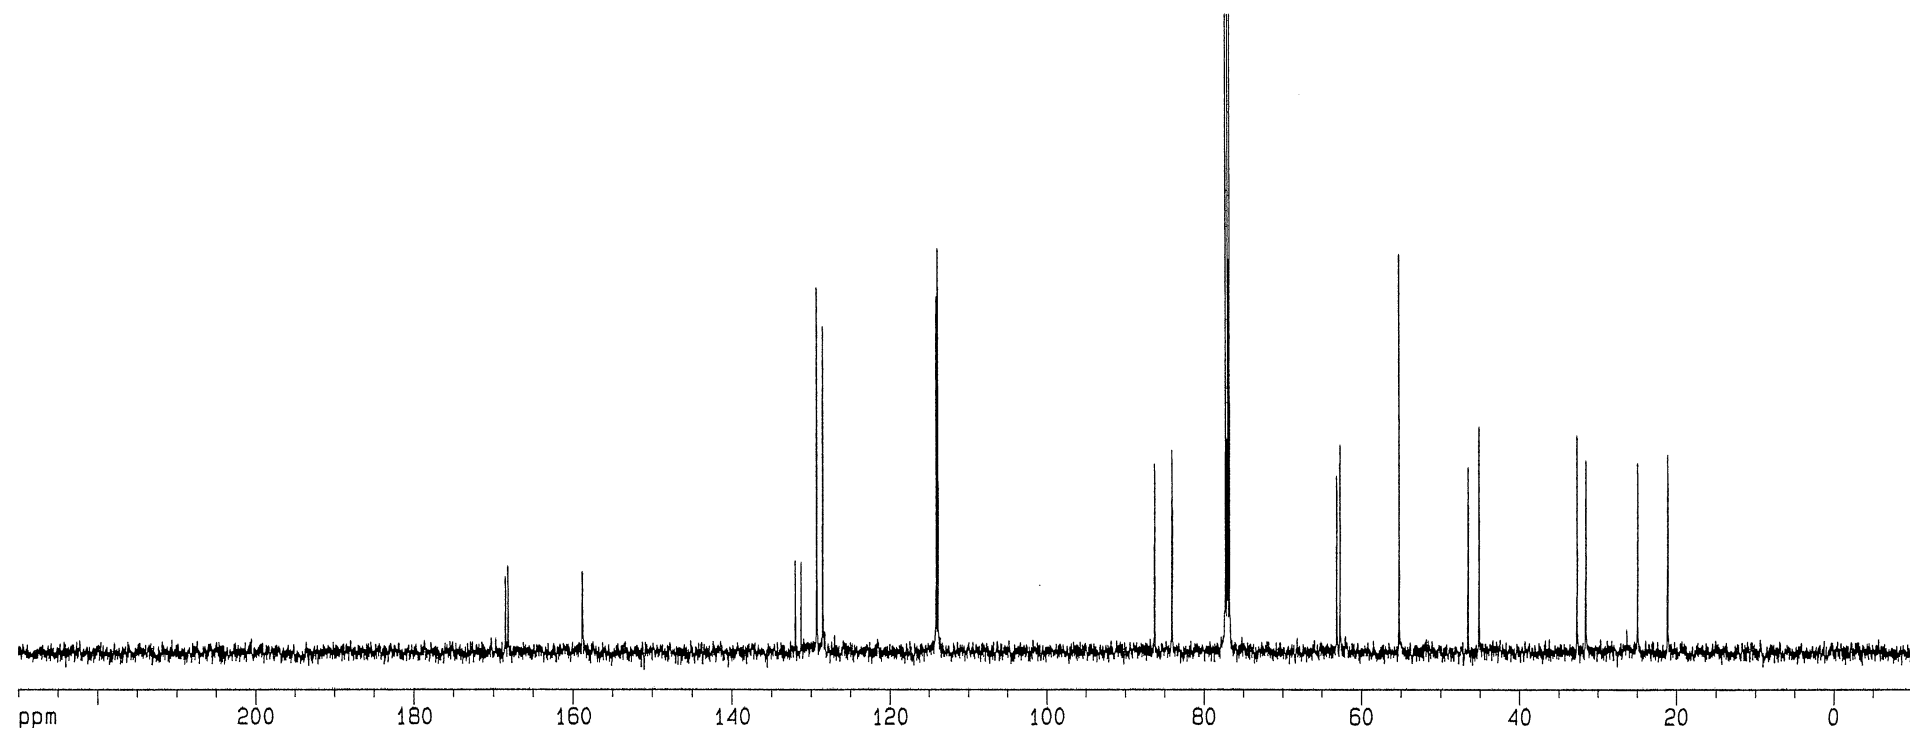

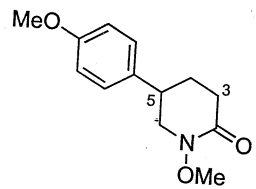

13

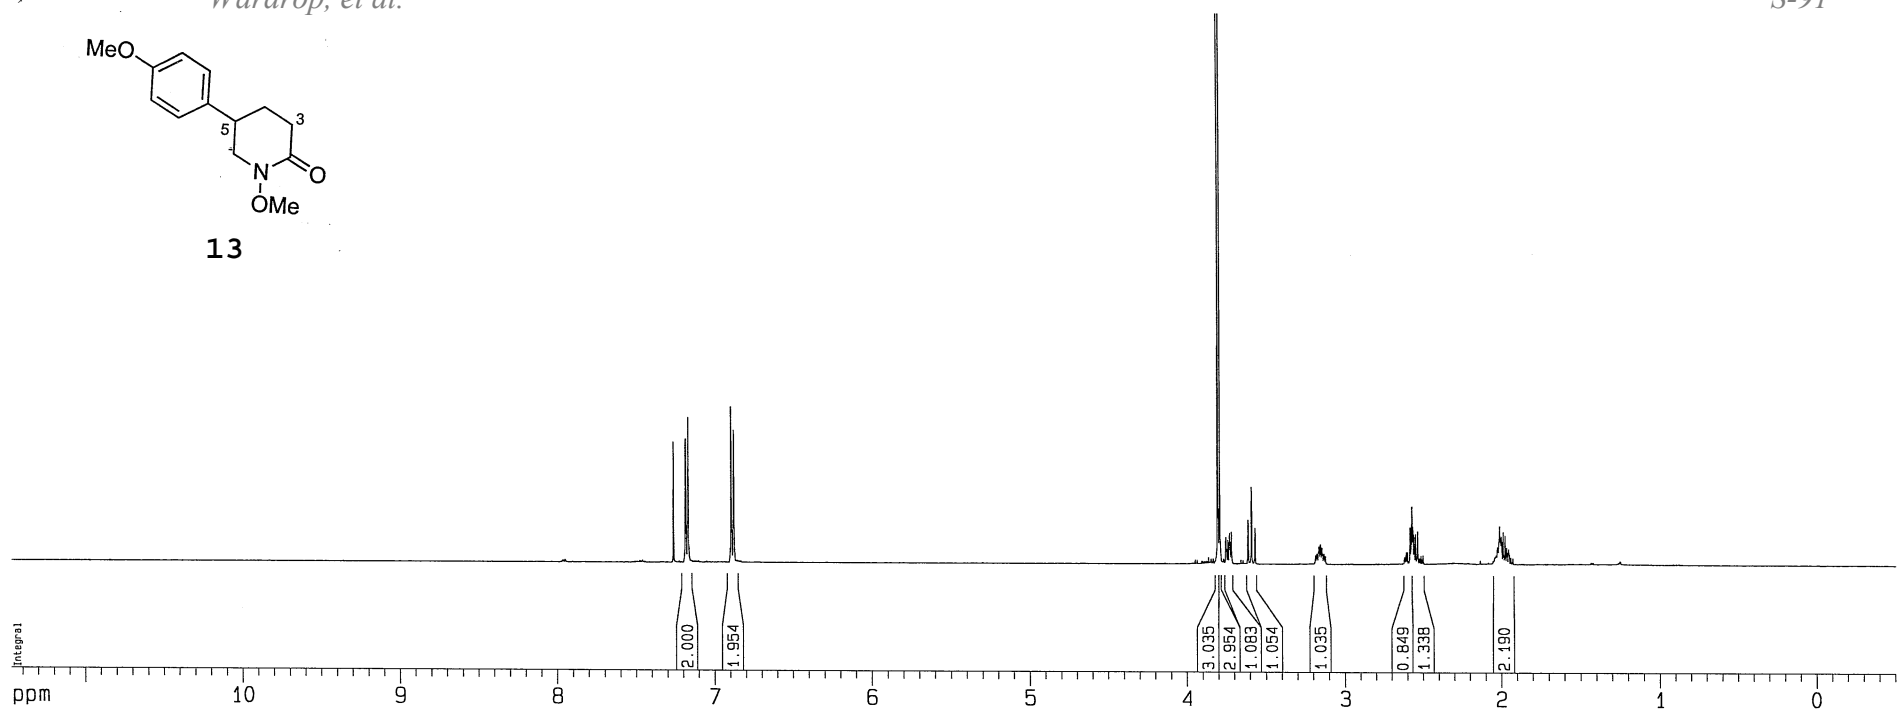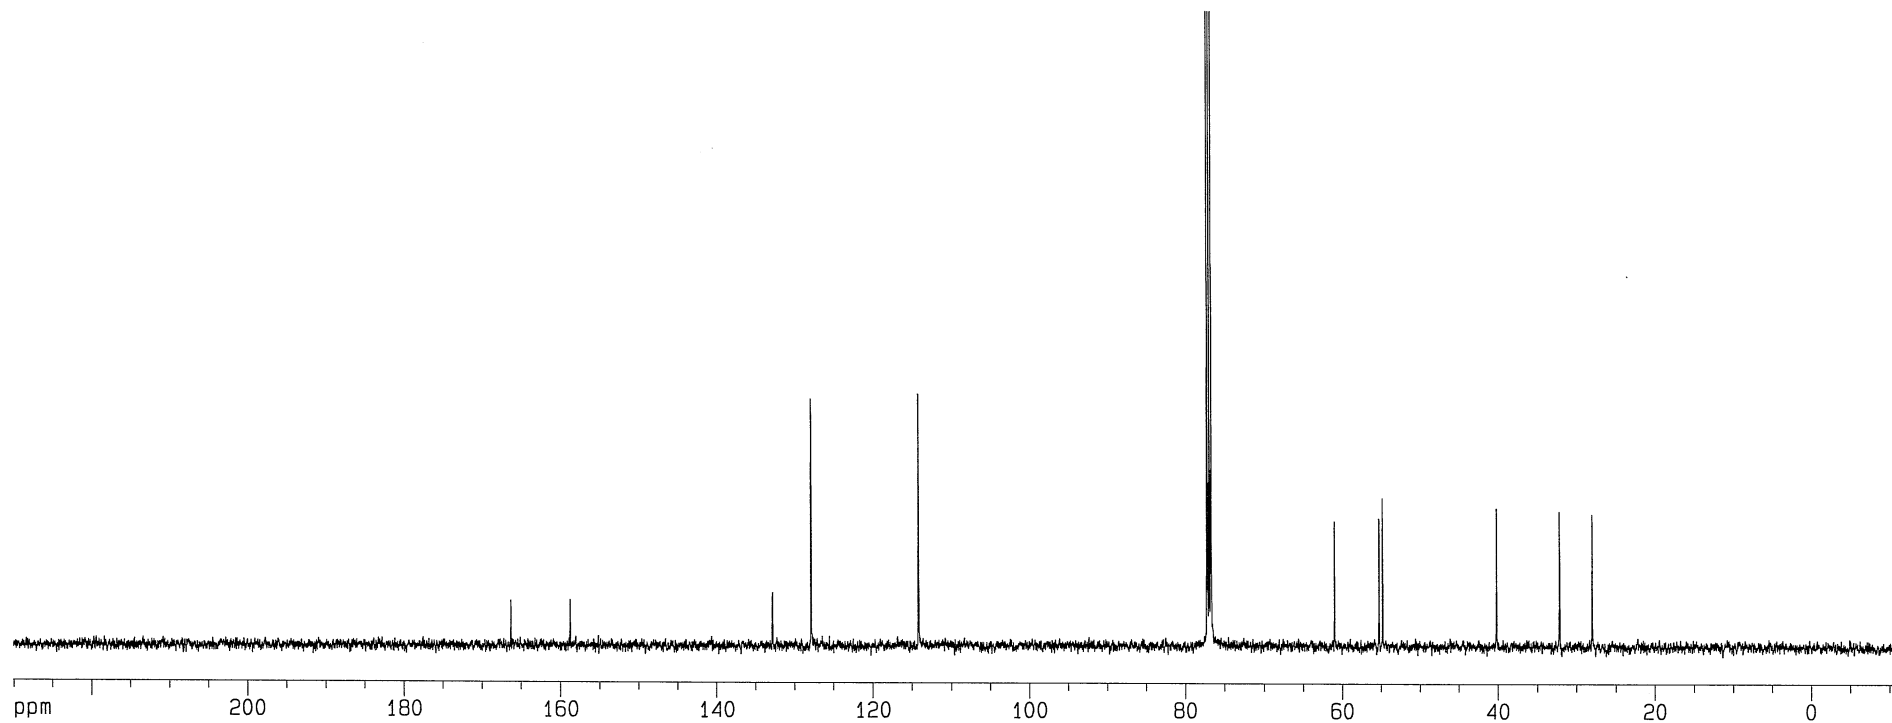

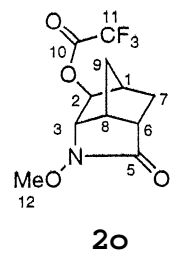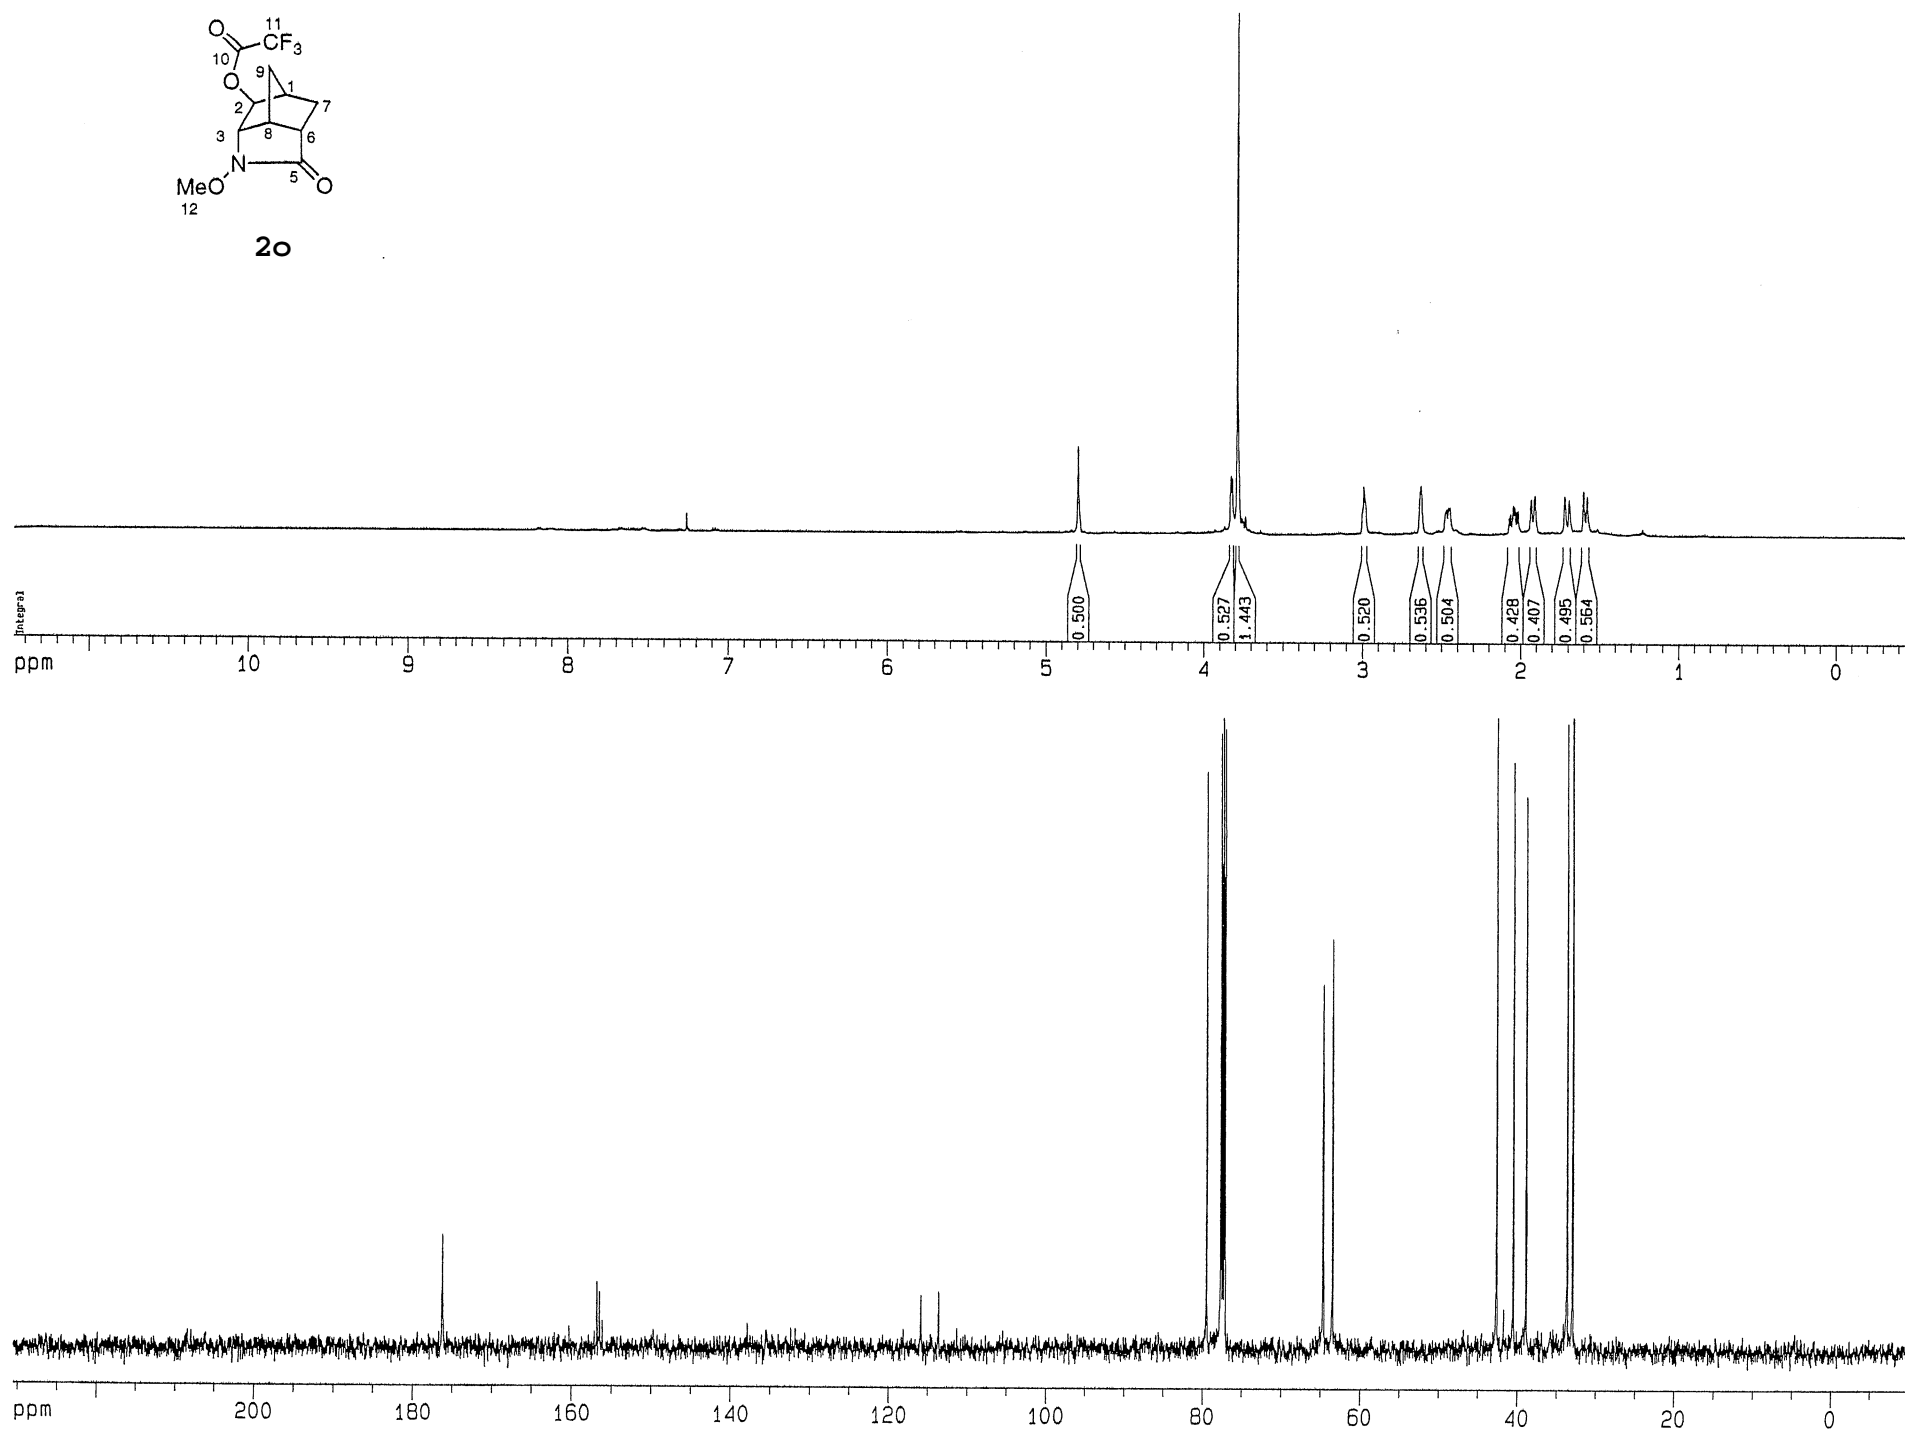

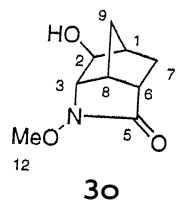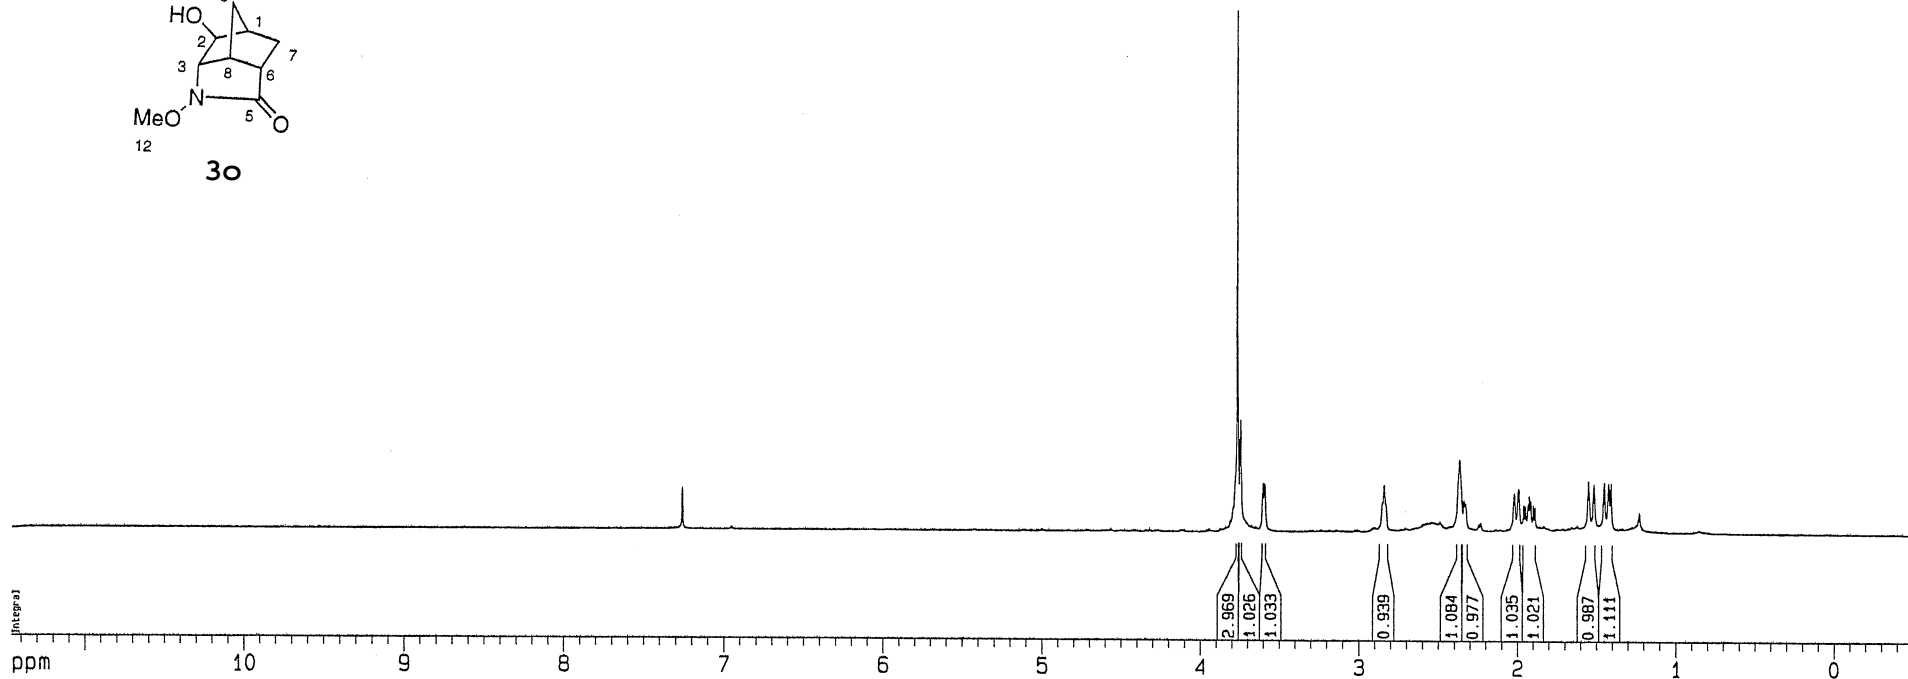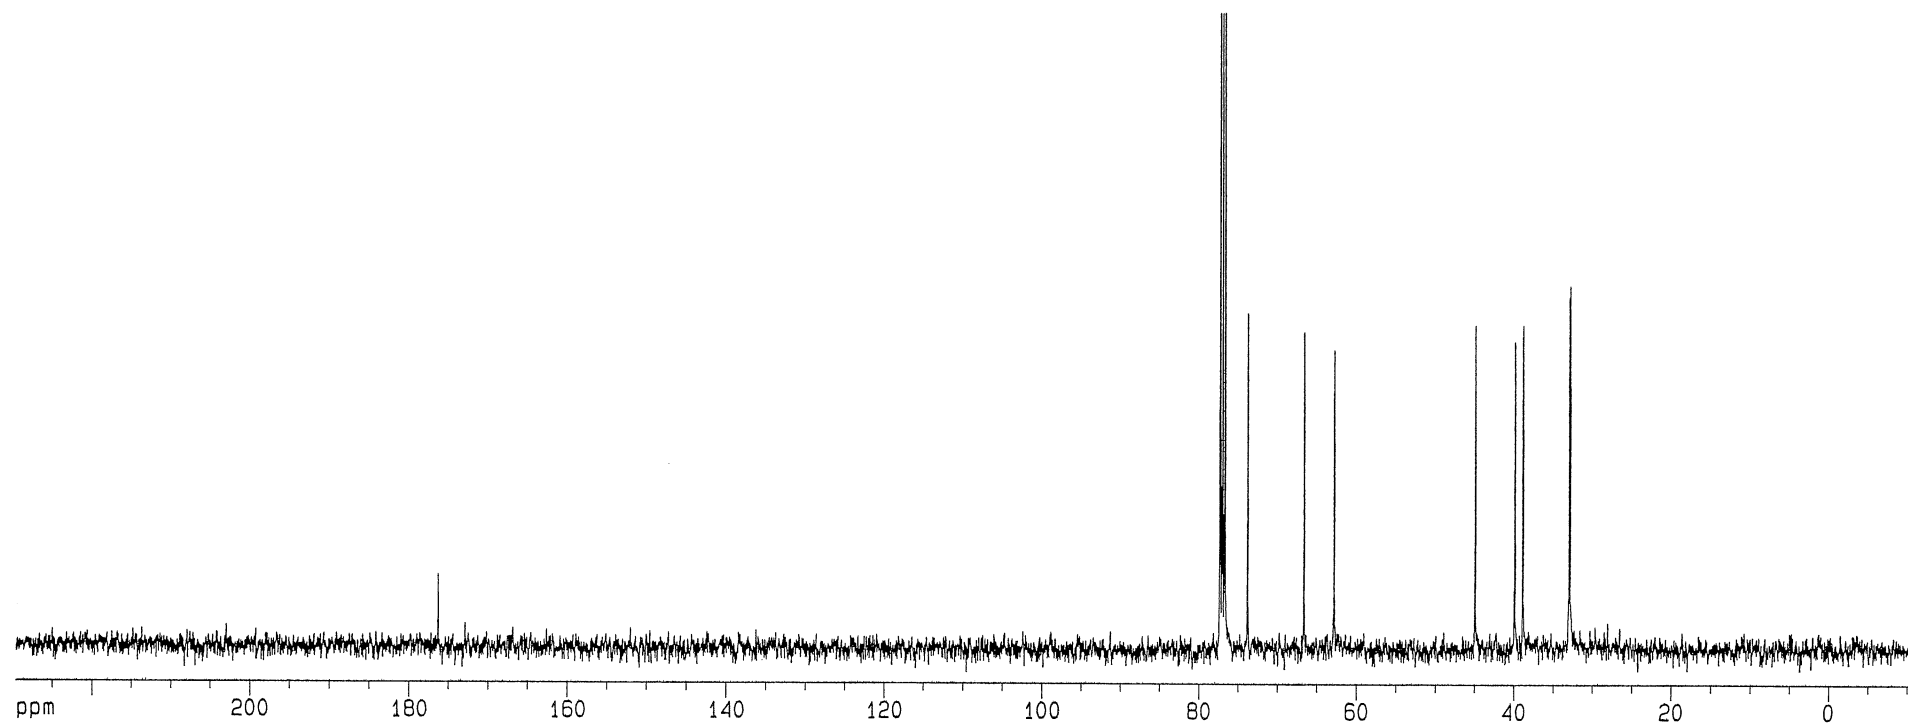

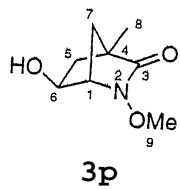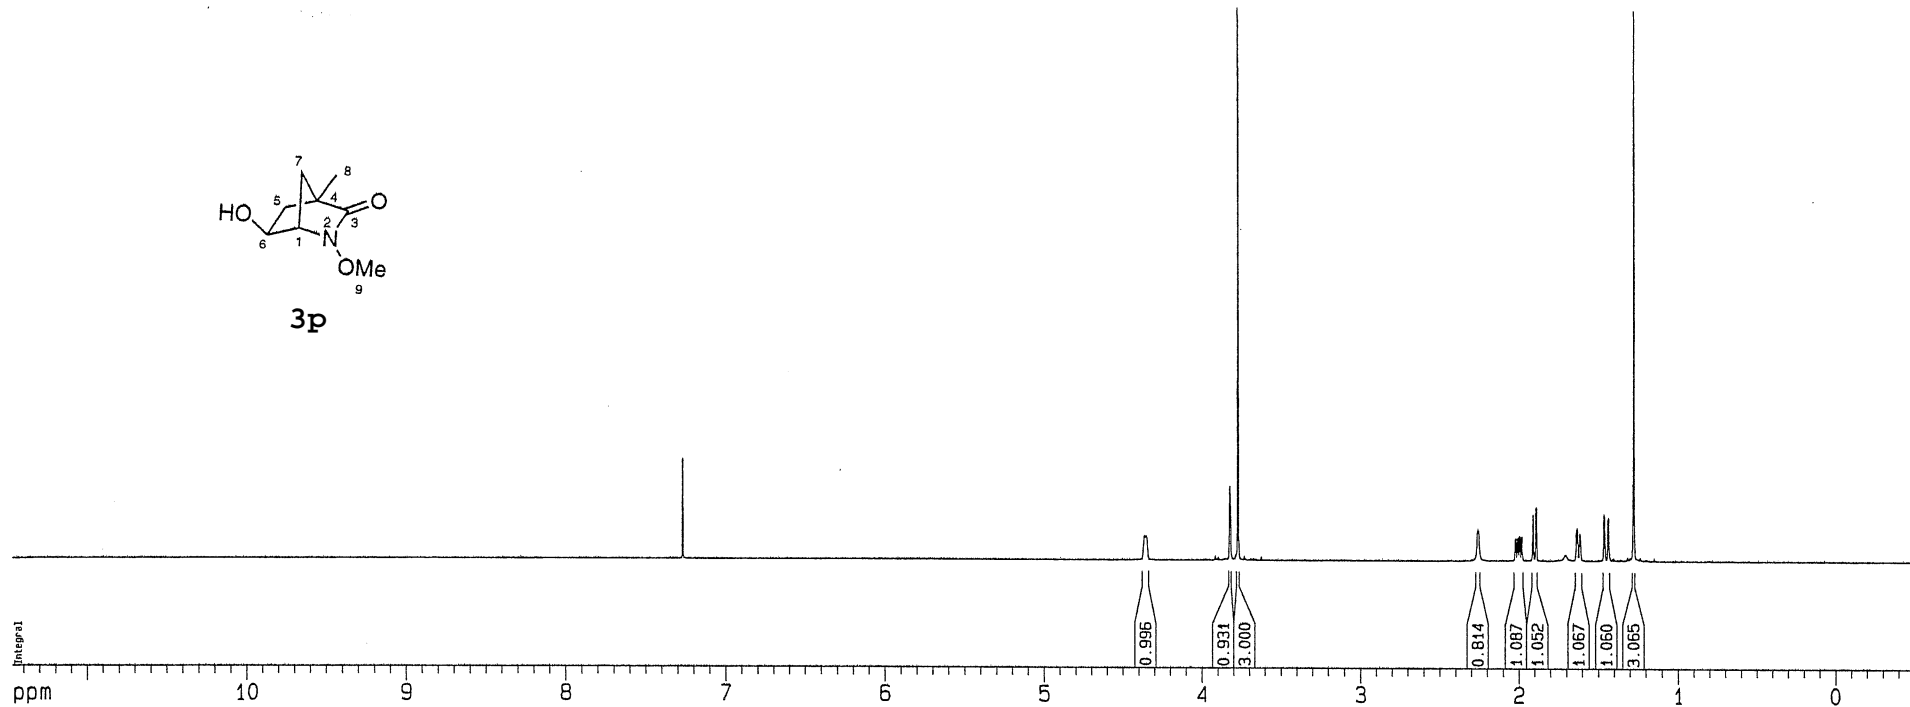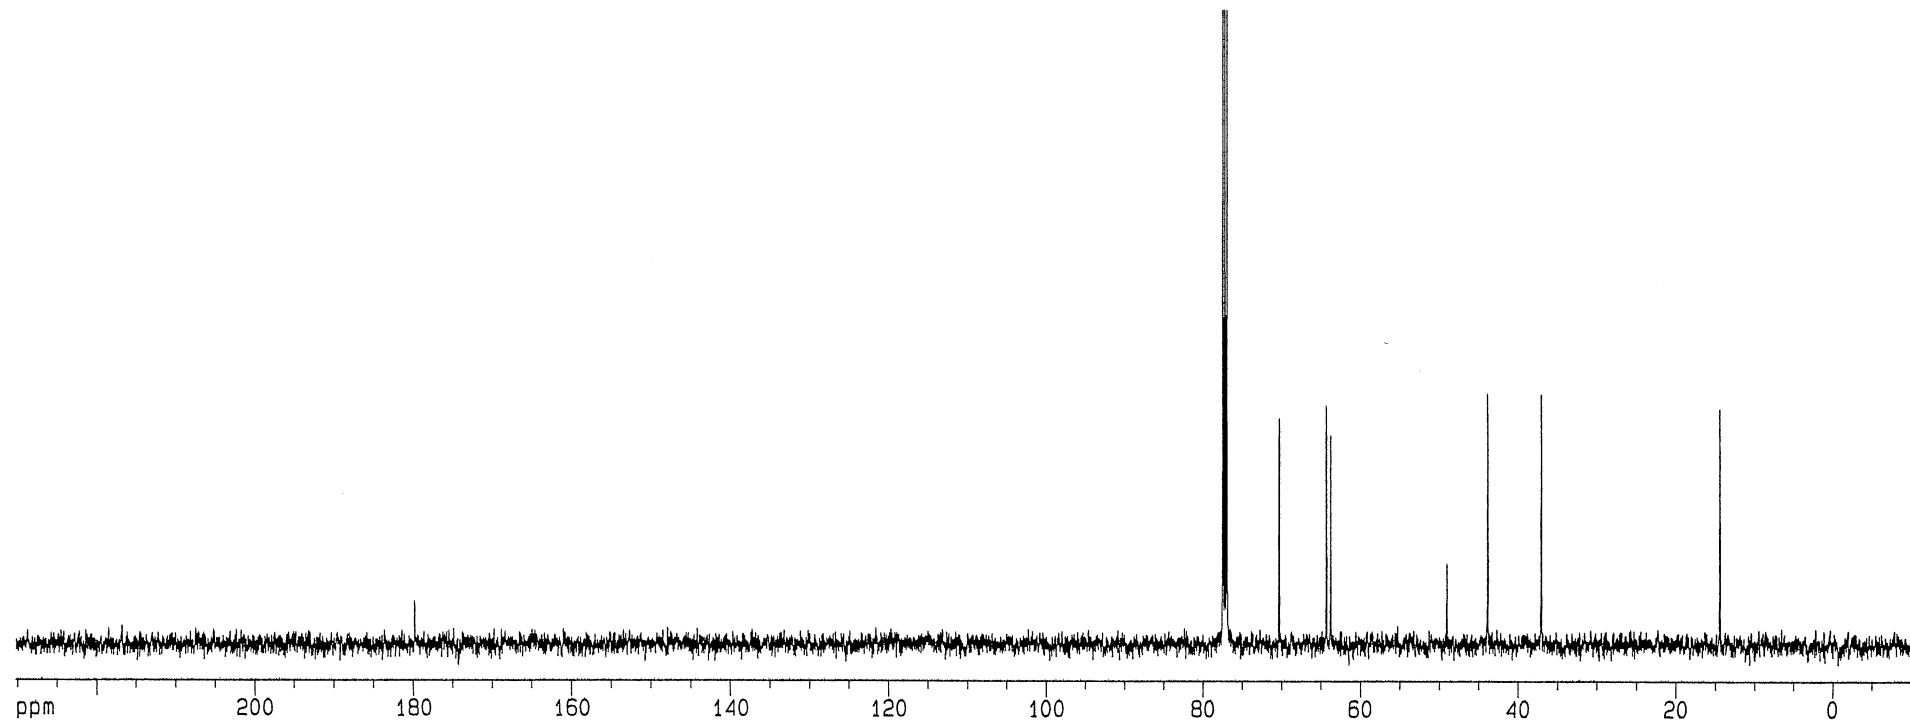

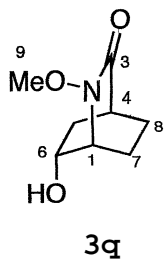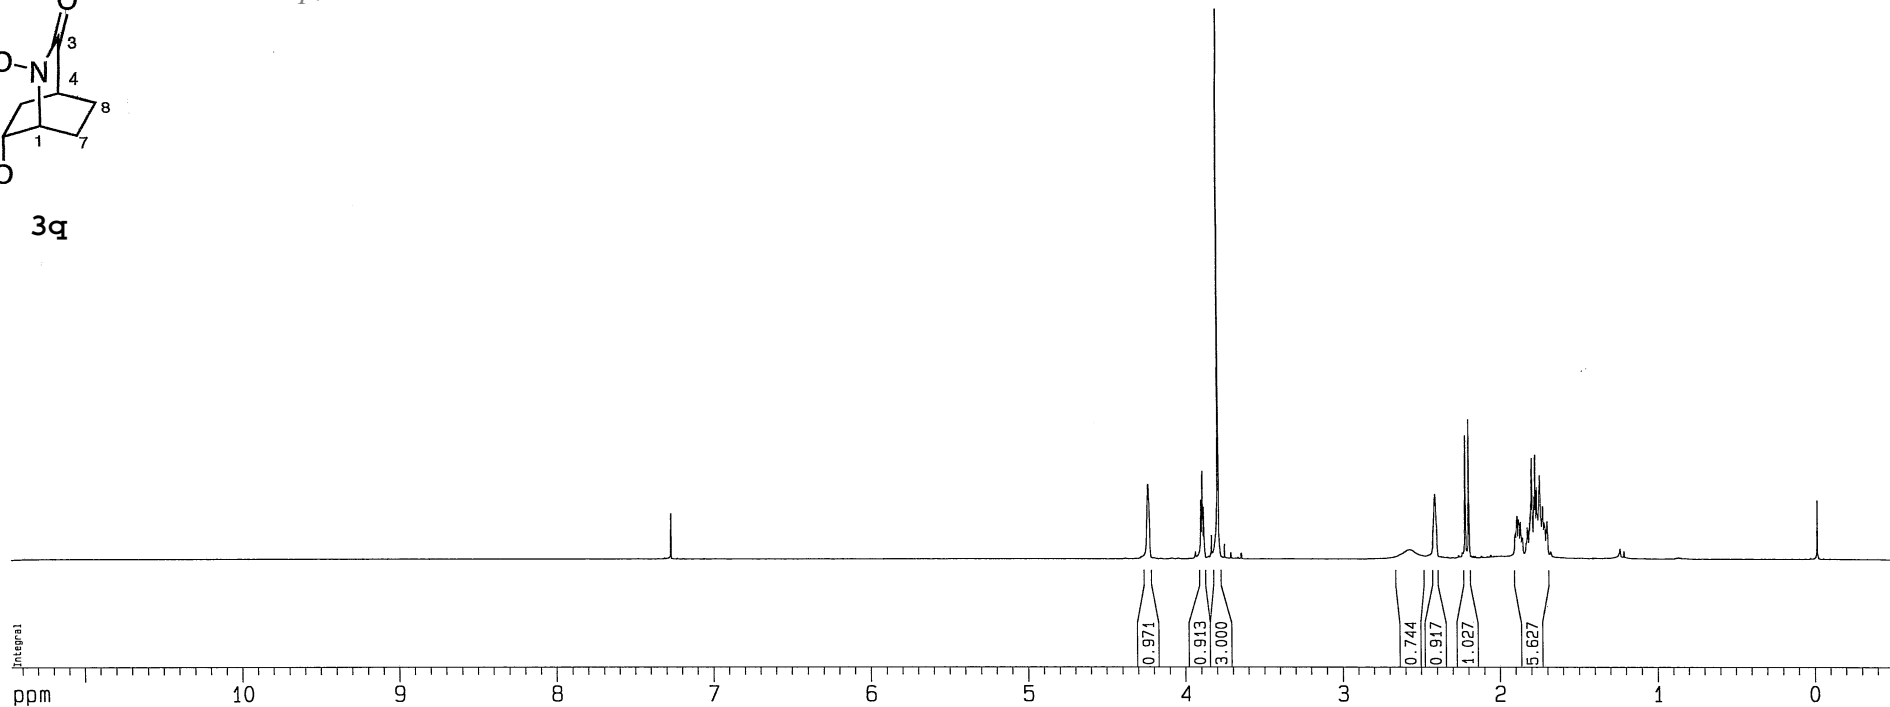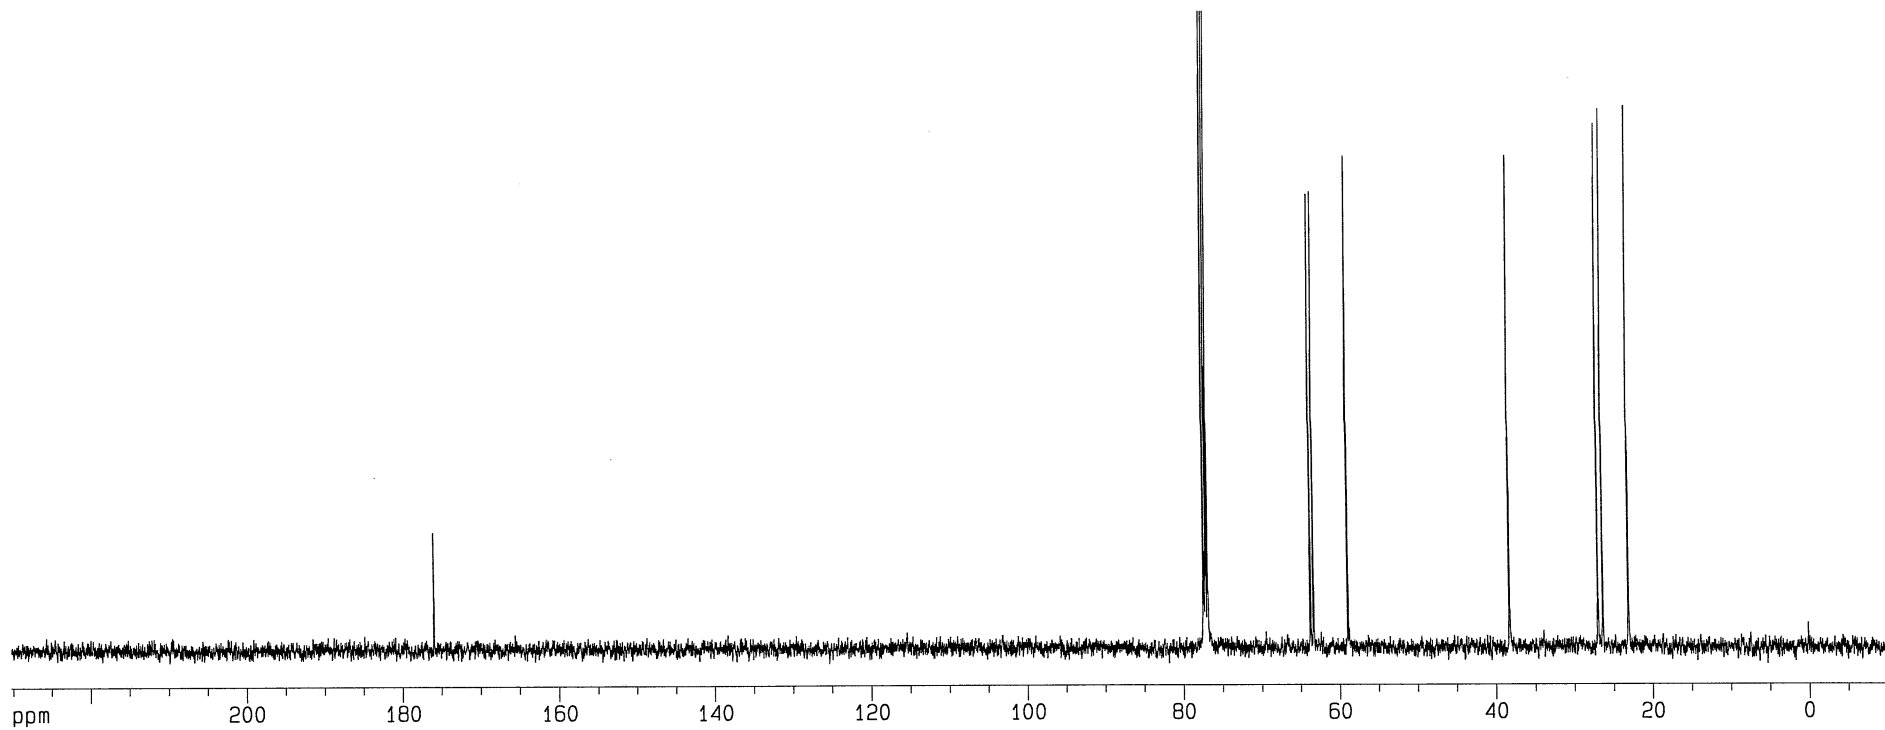



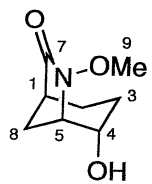

Wardrop, et al.

S-96

3r

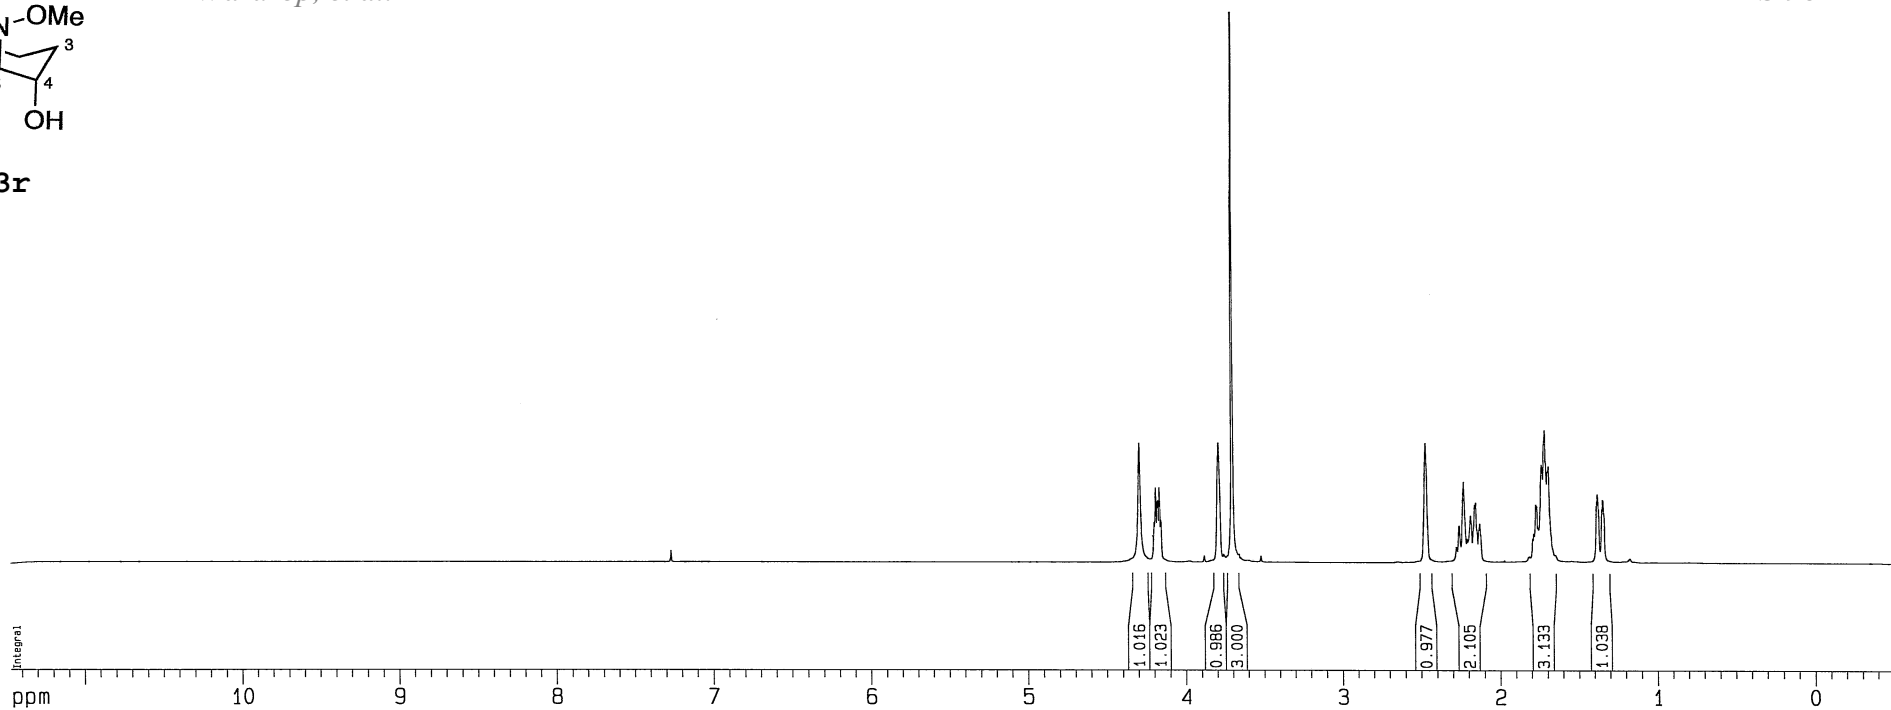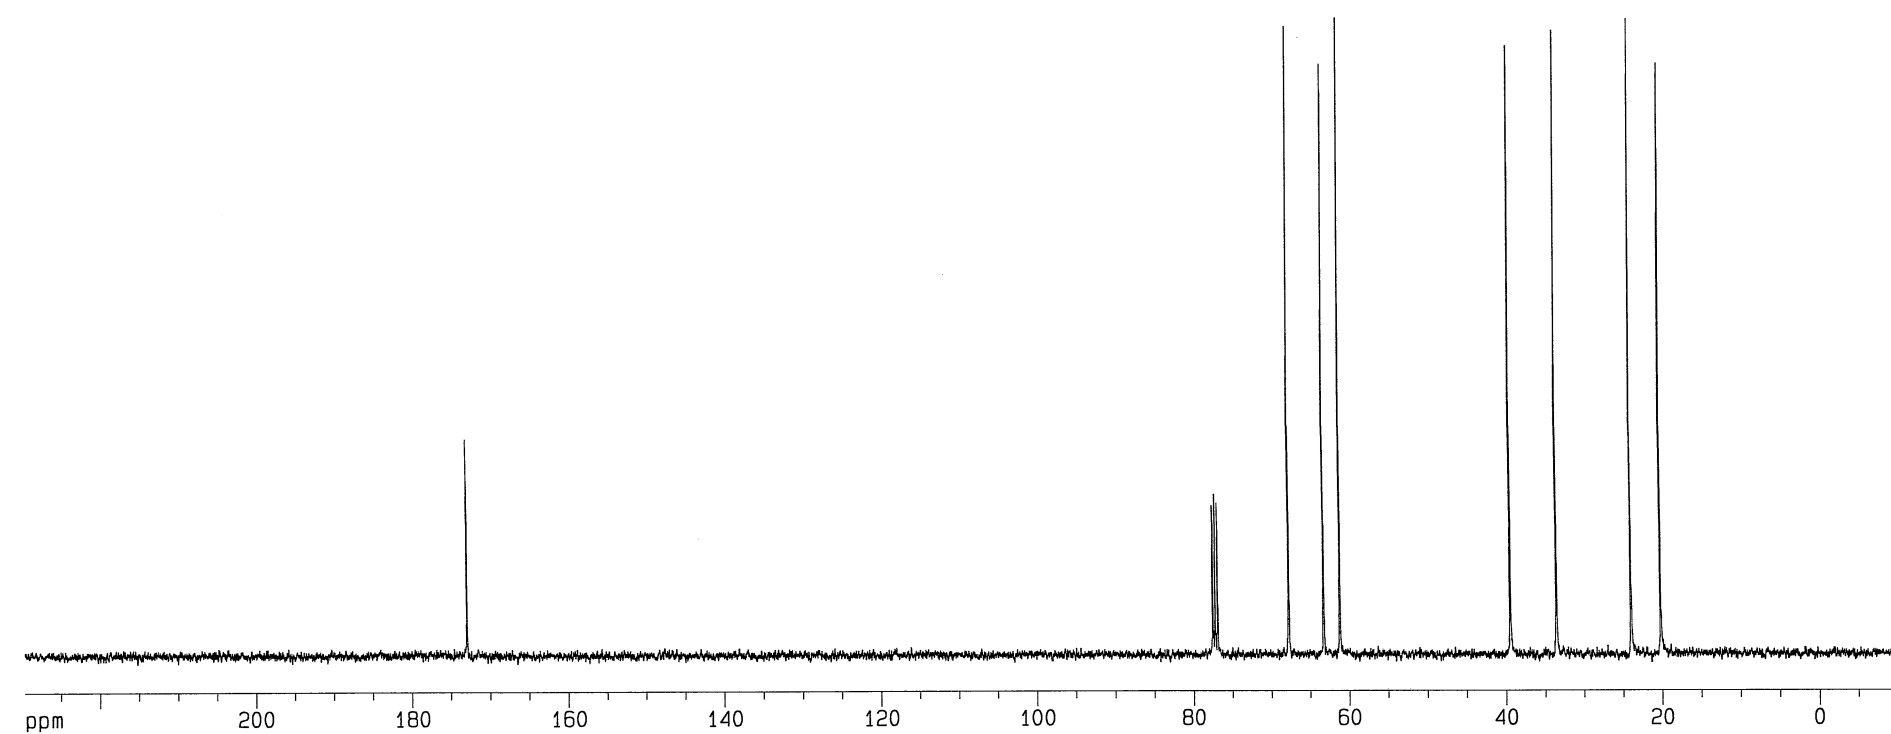

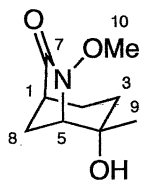

3s

Wardrop, et al.

S-97

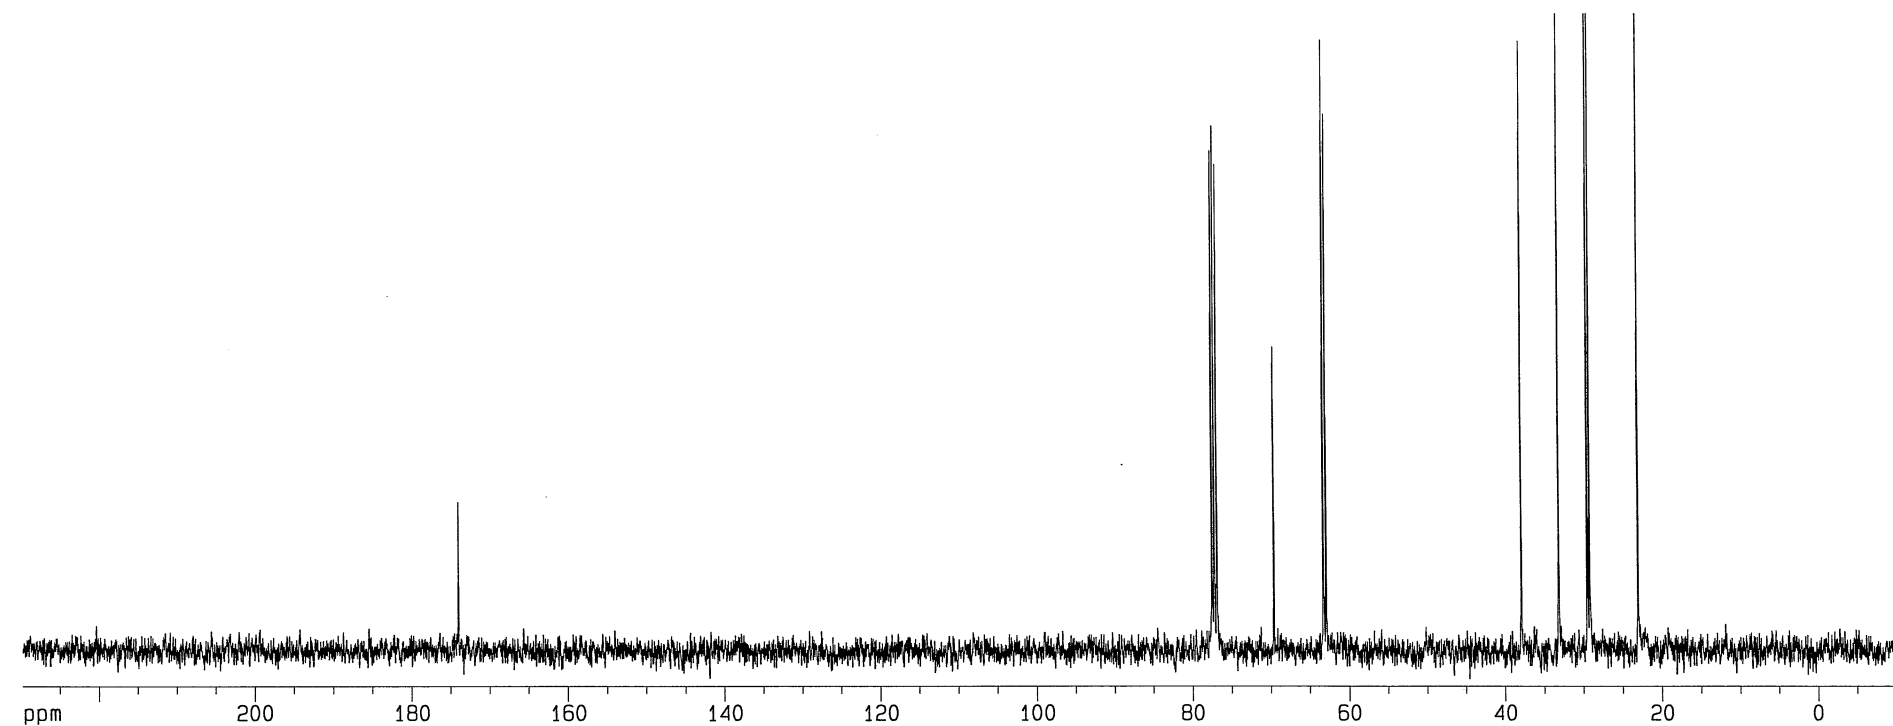

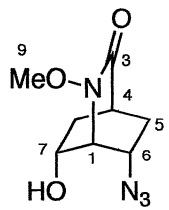

3t

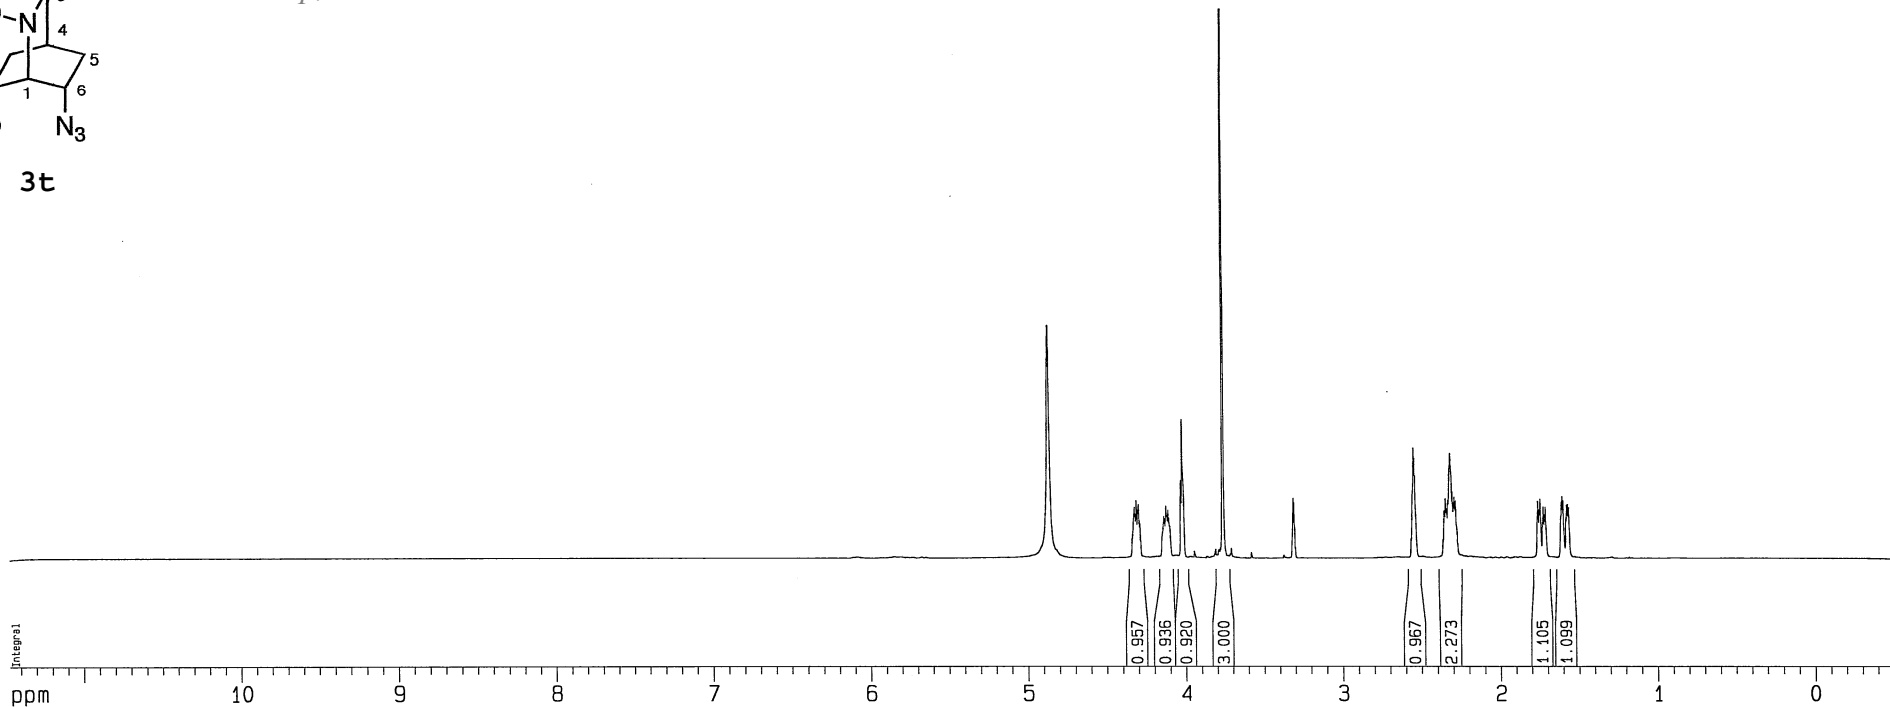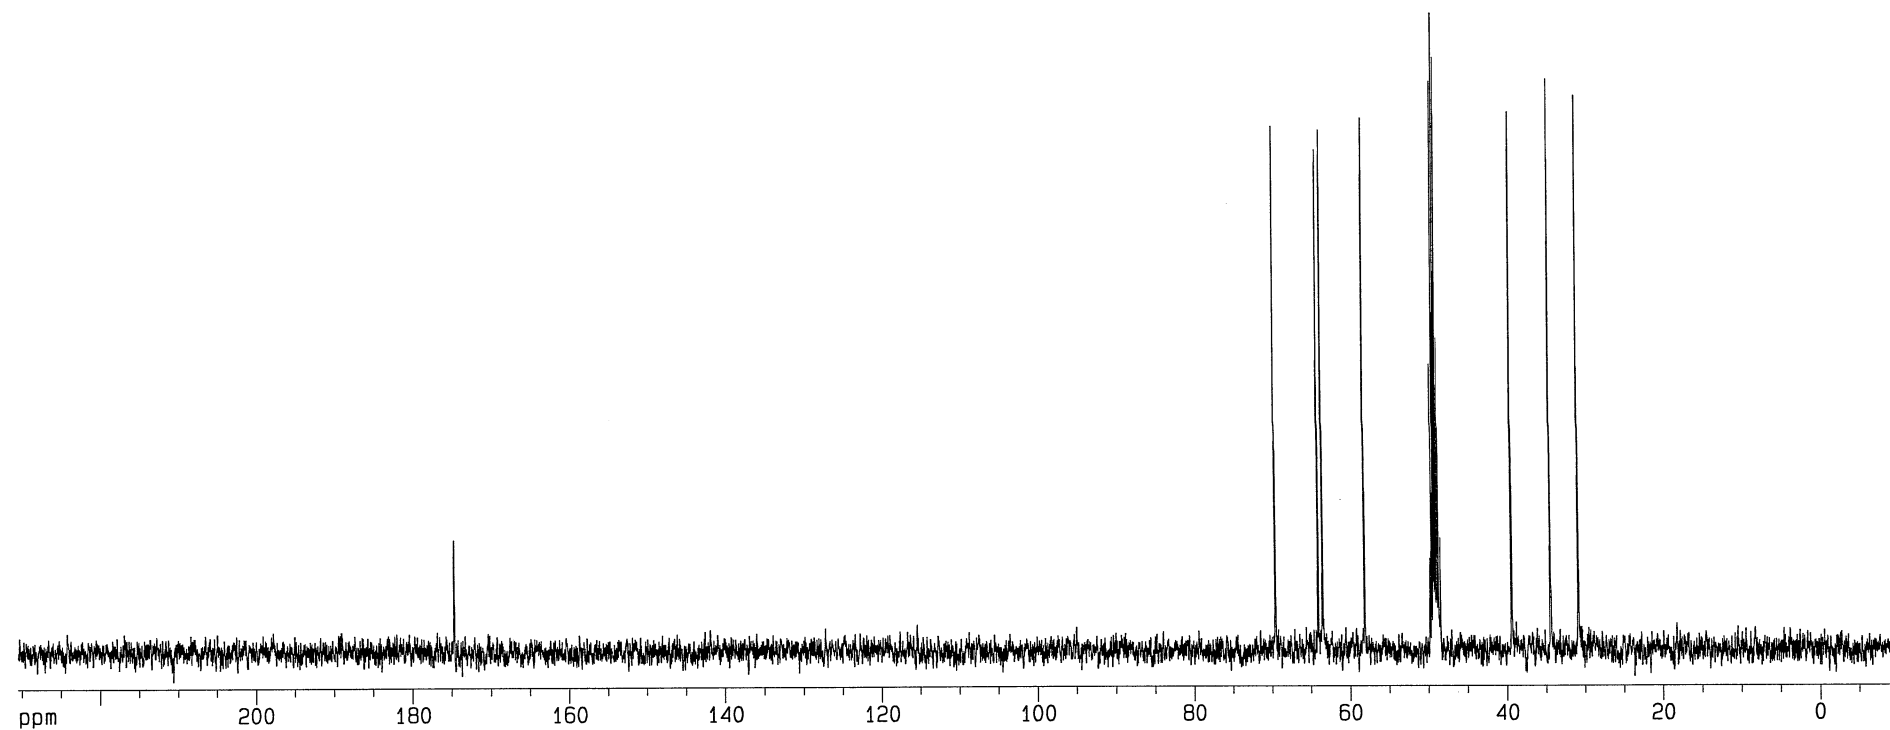

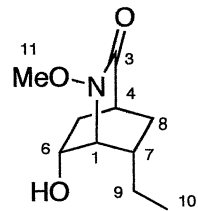

Wardrop, et al.

S-99

3u

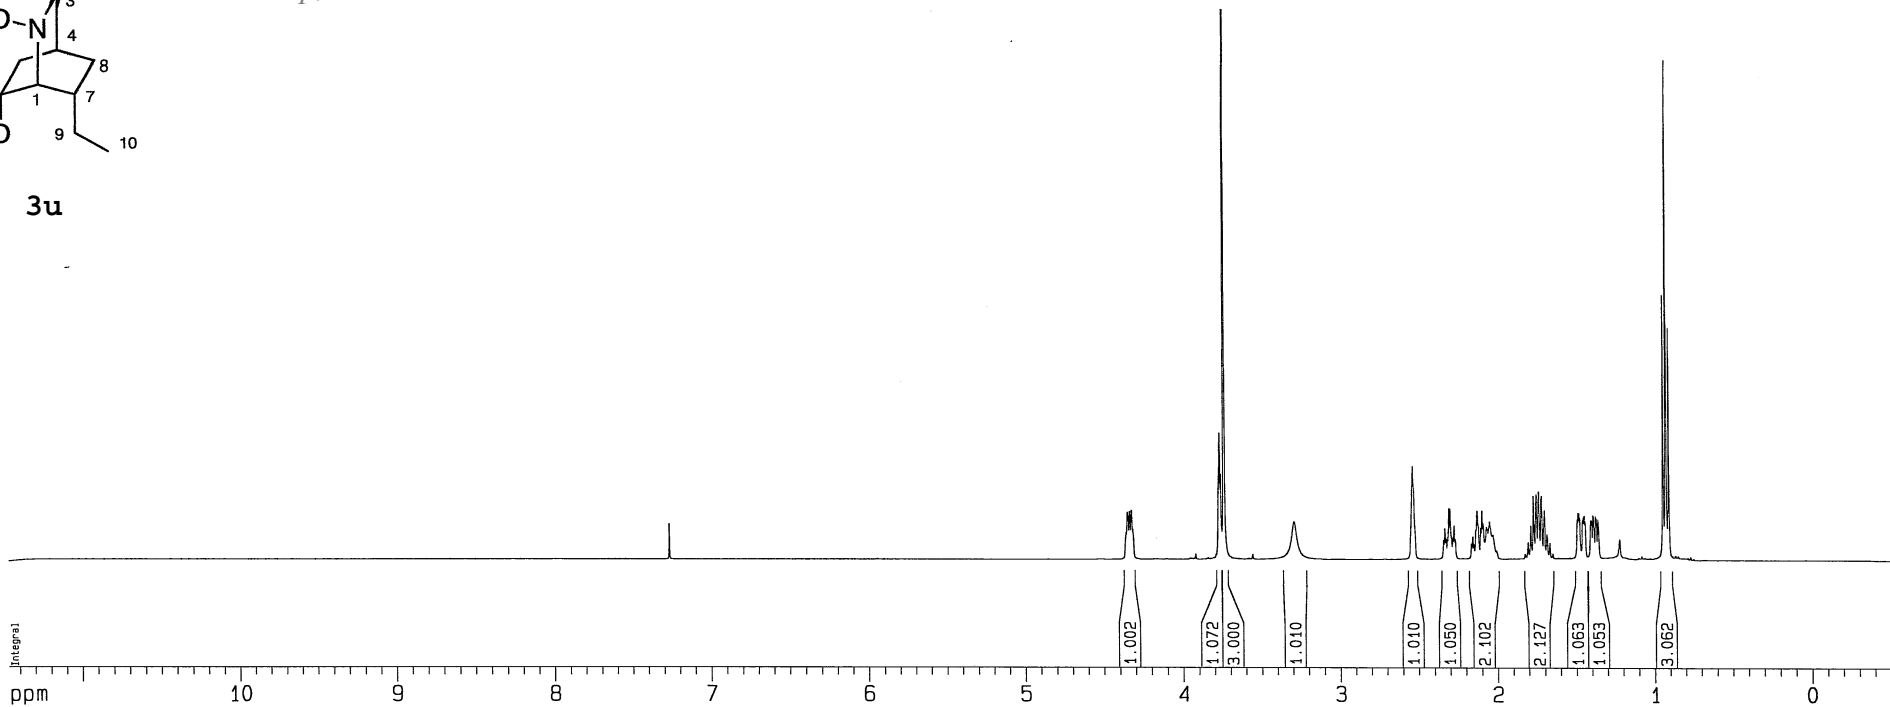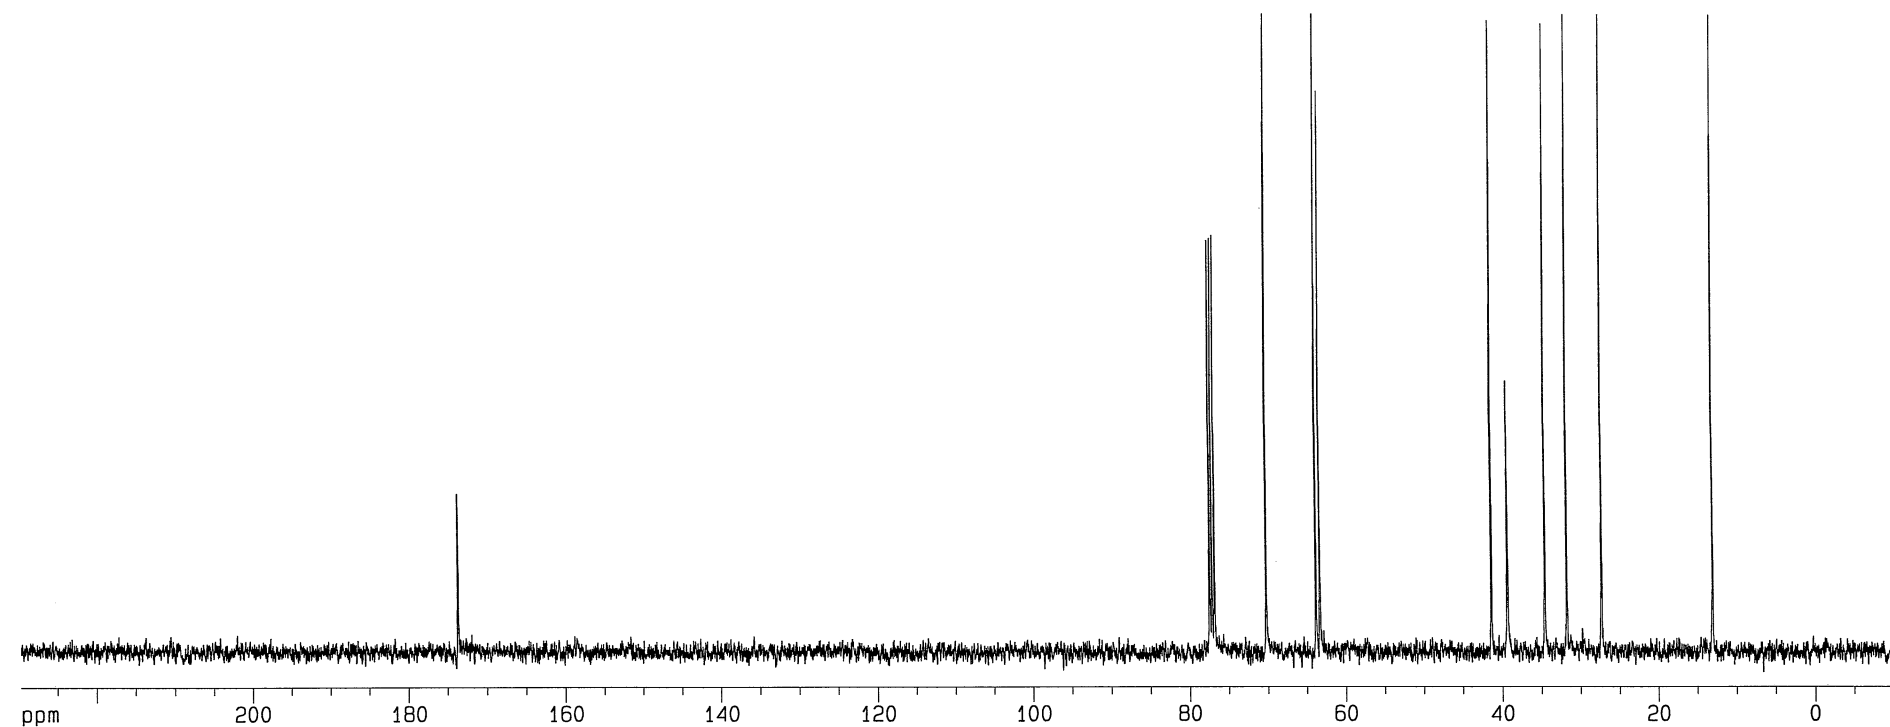

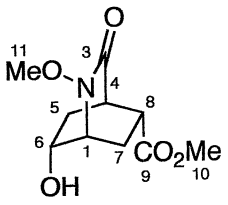

Wardrop, et al.

S-100

3v

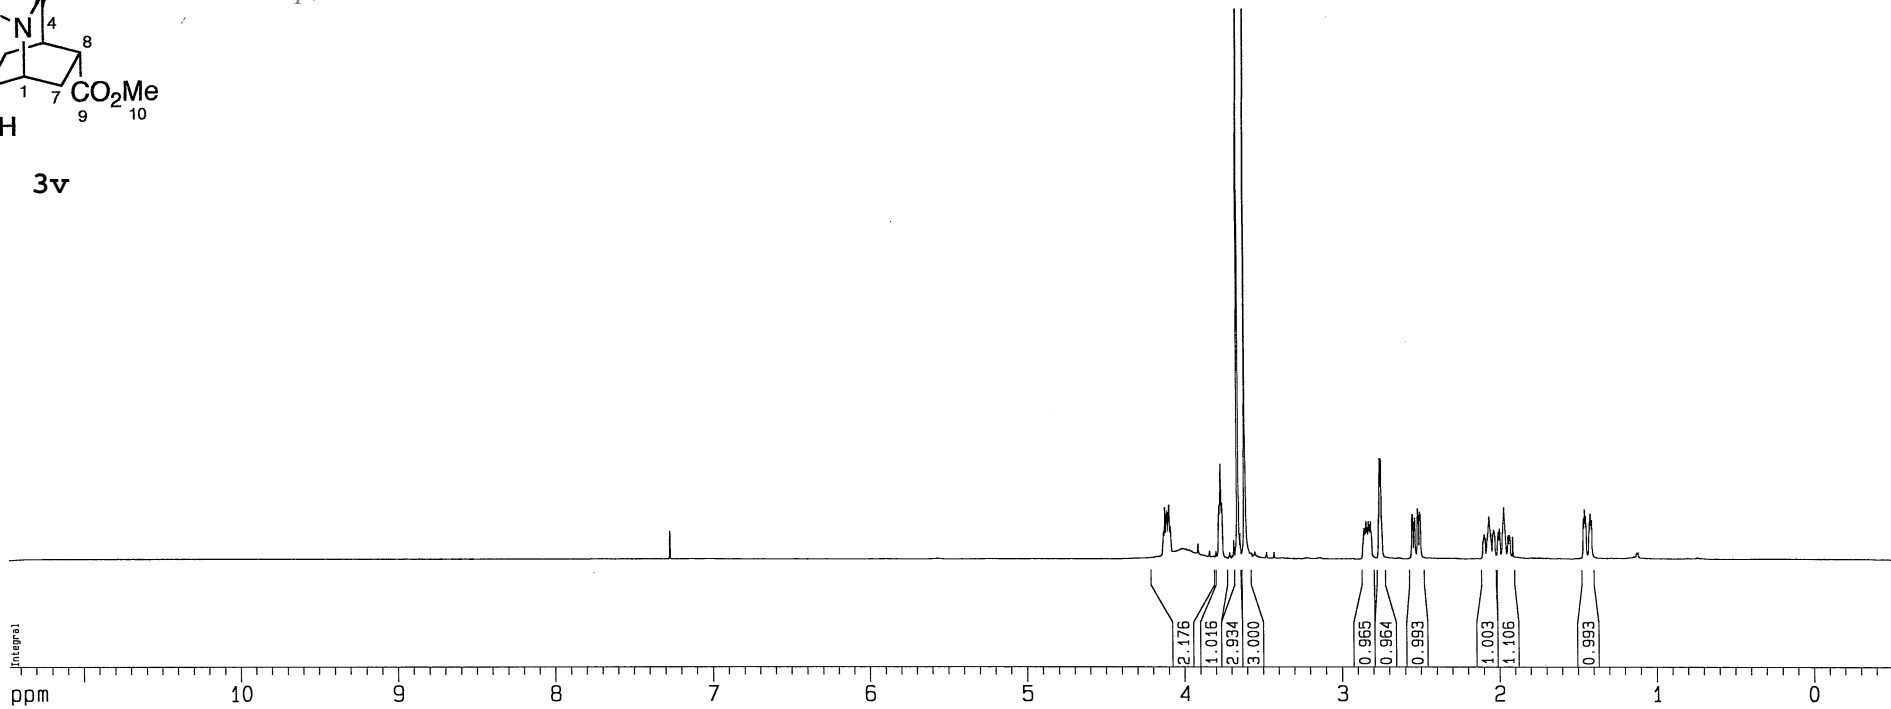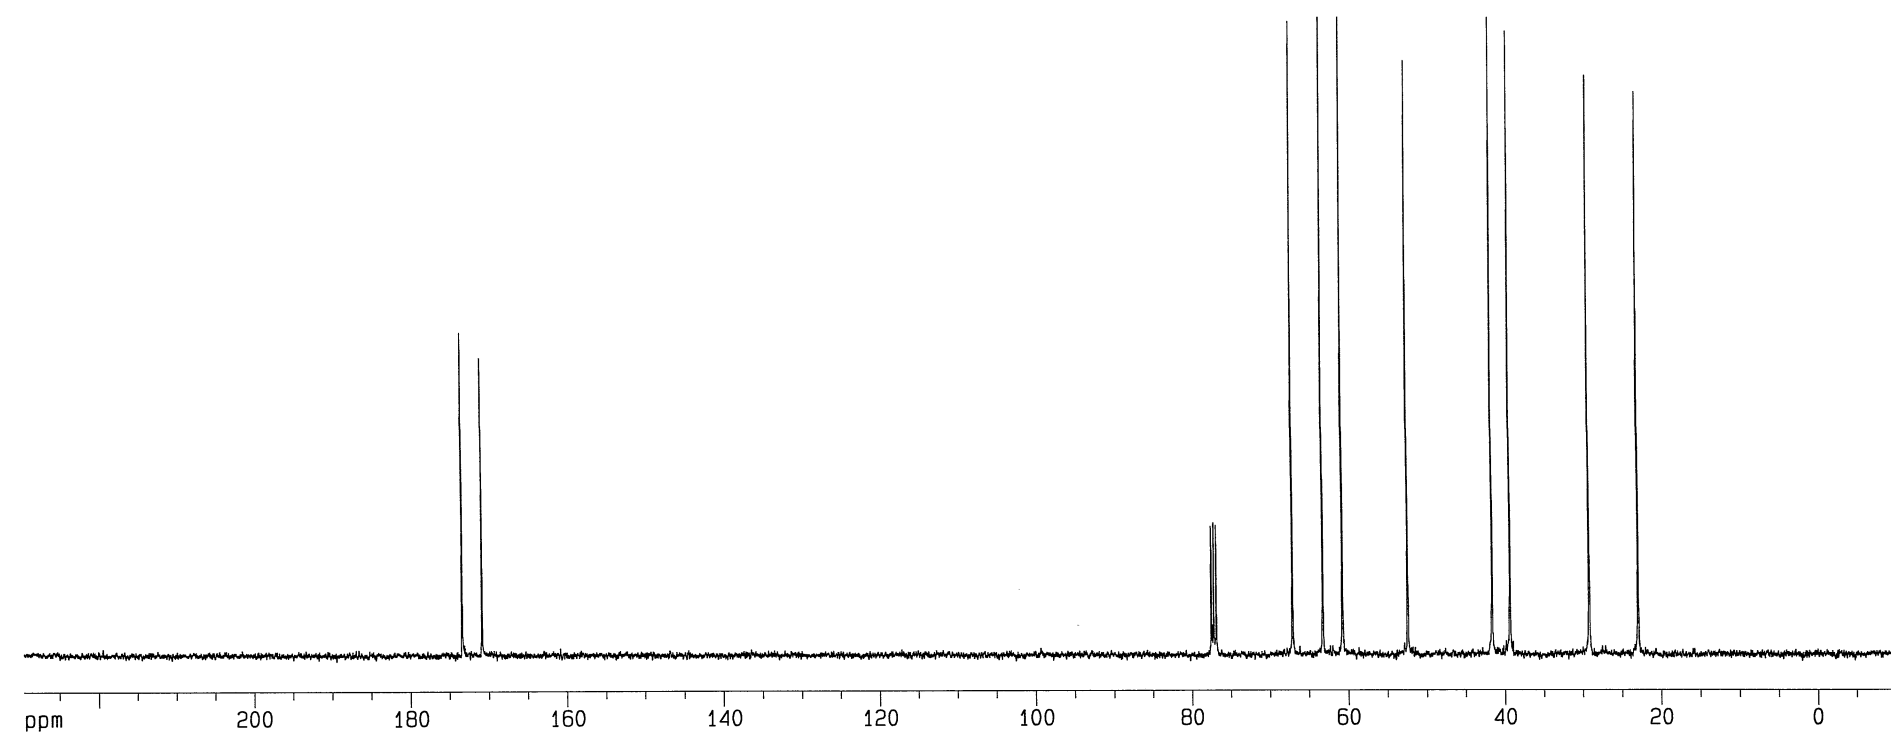

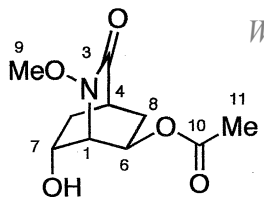

3w

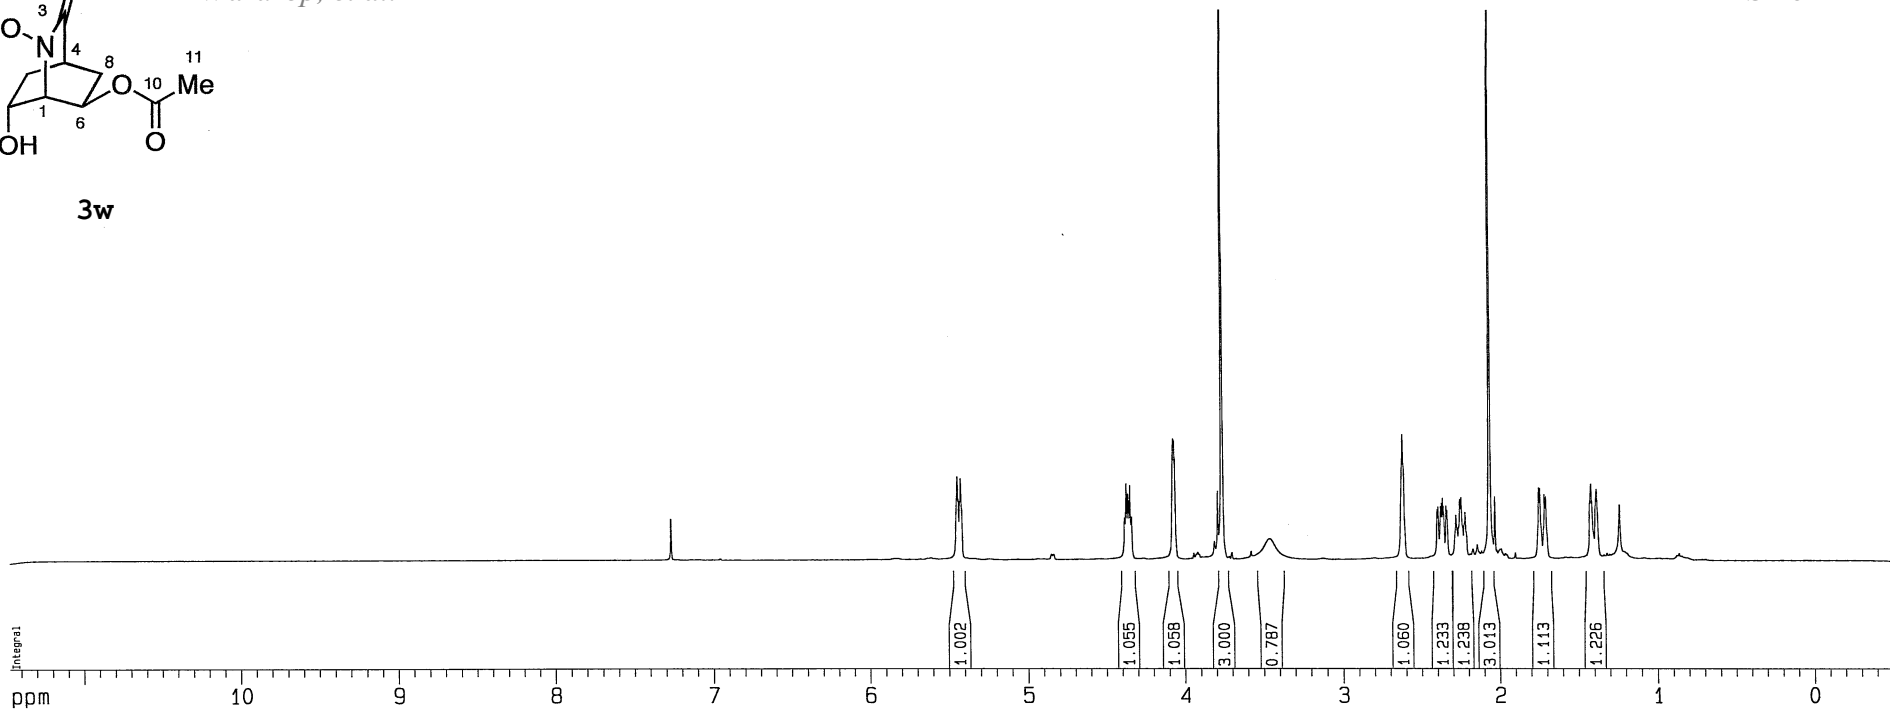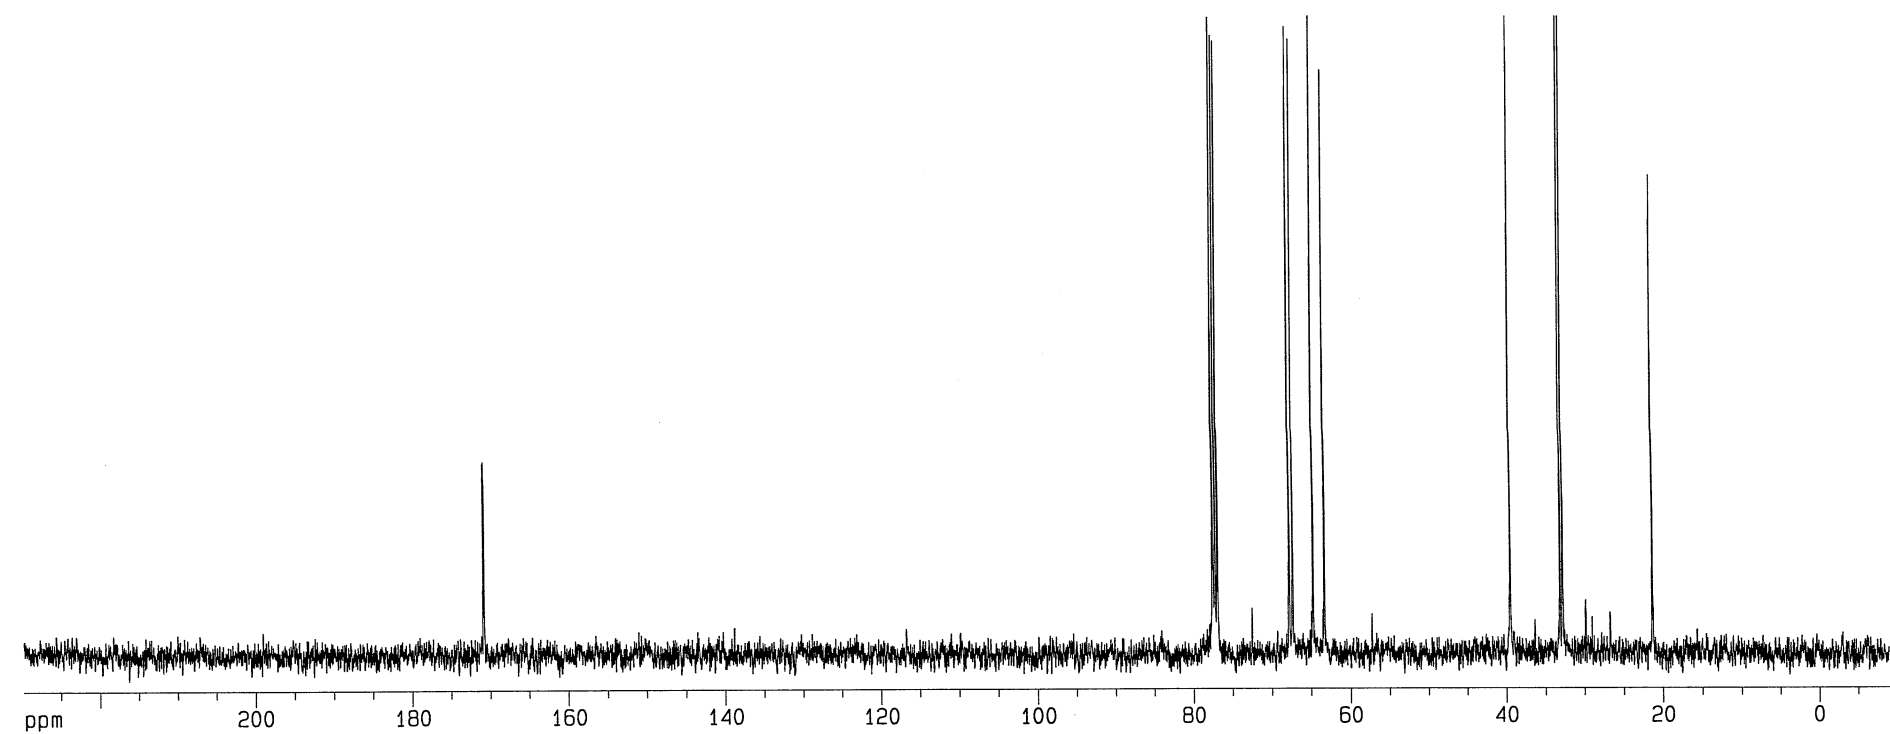

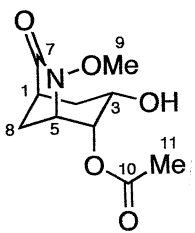

3x

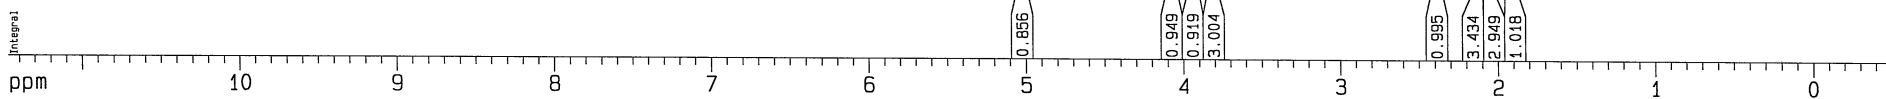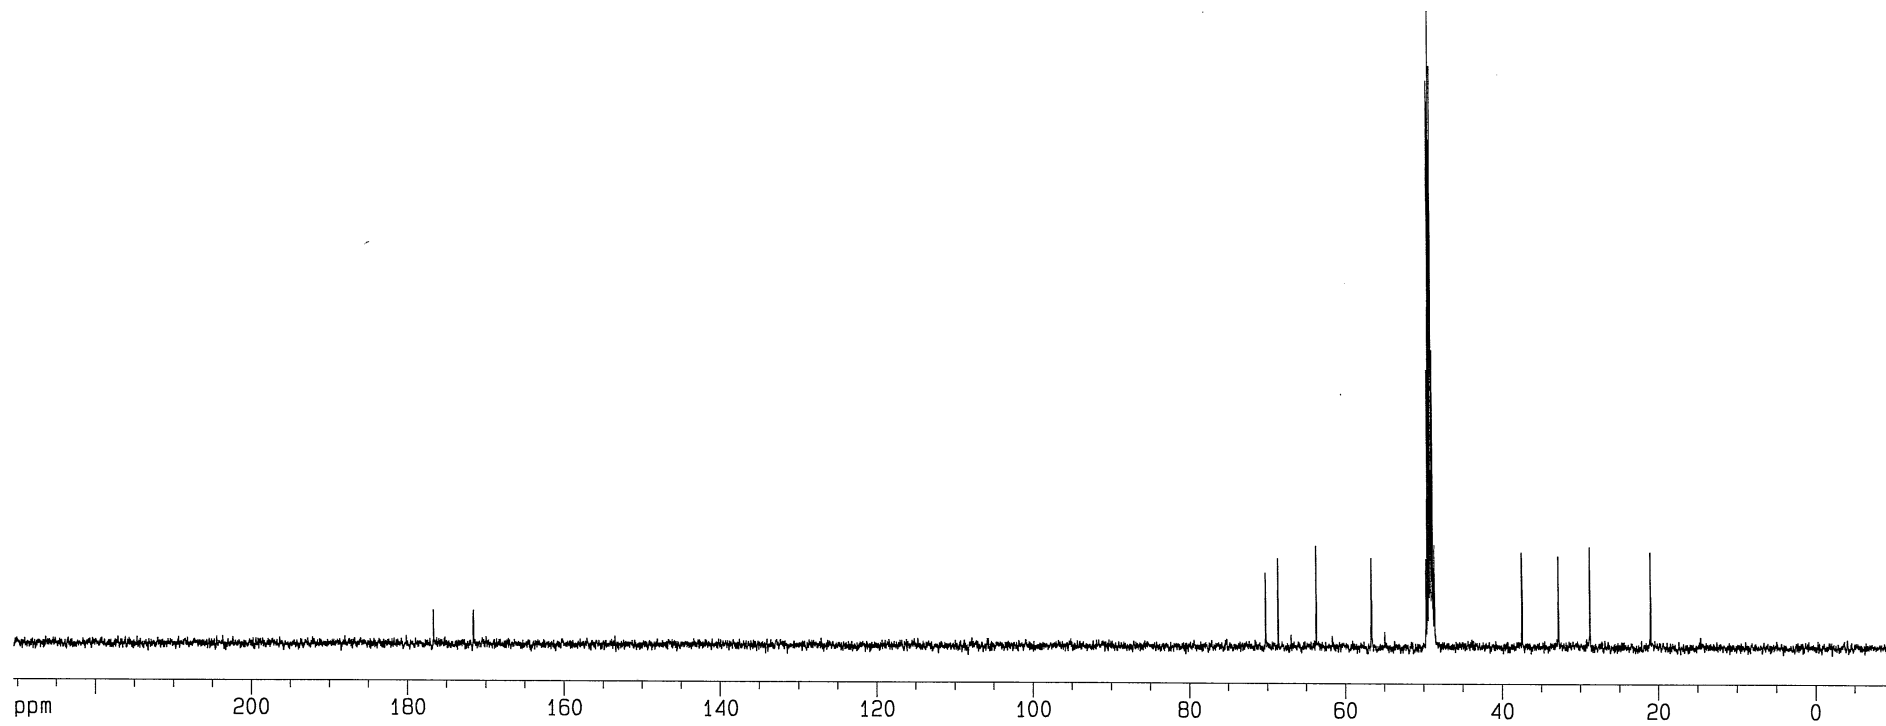

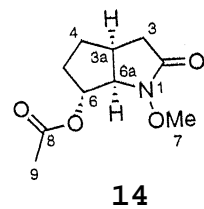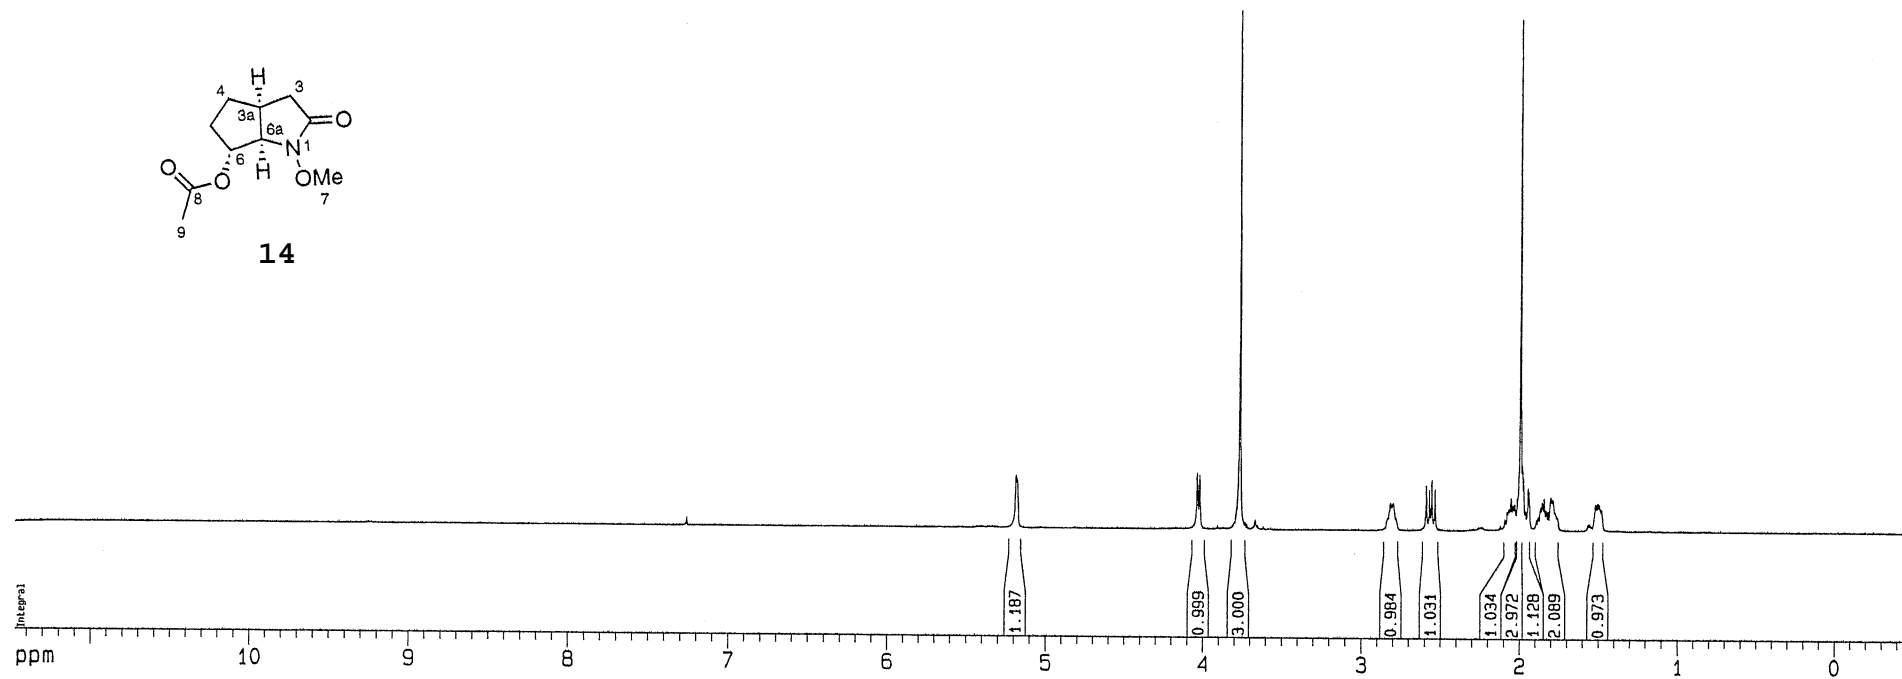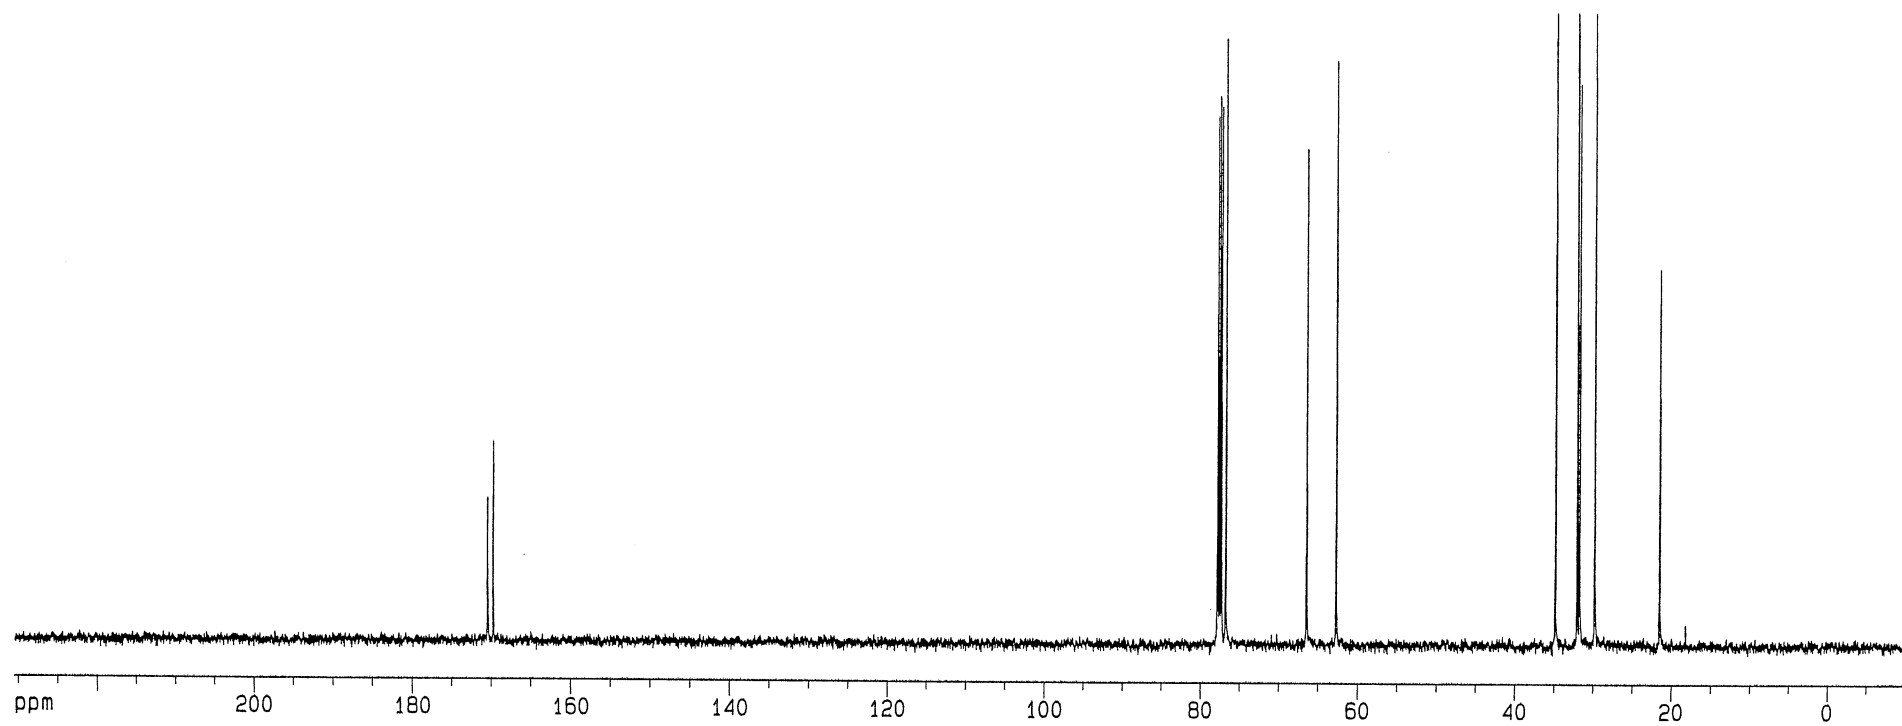



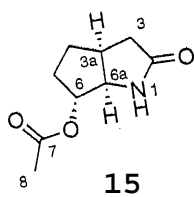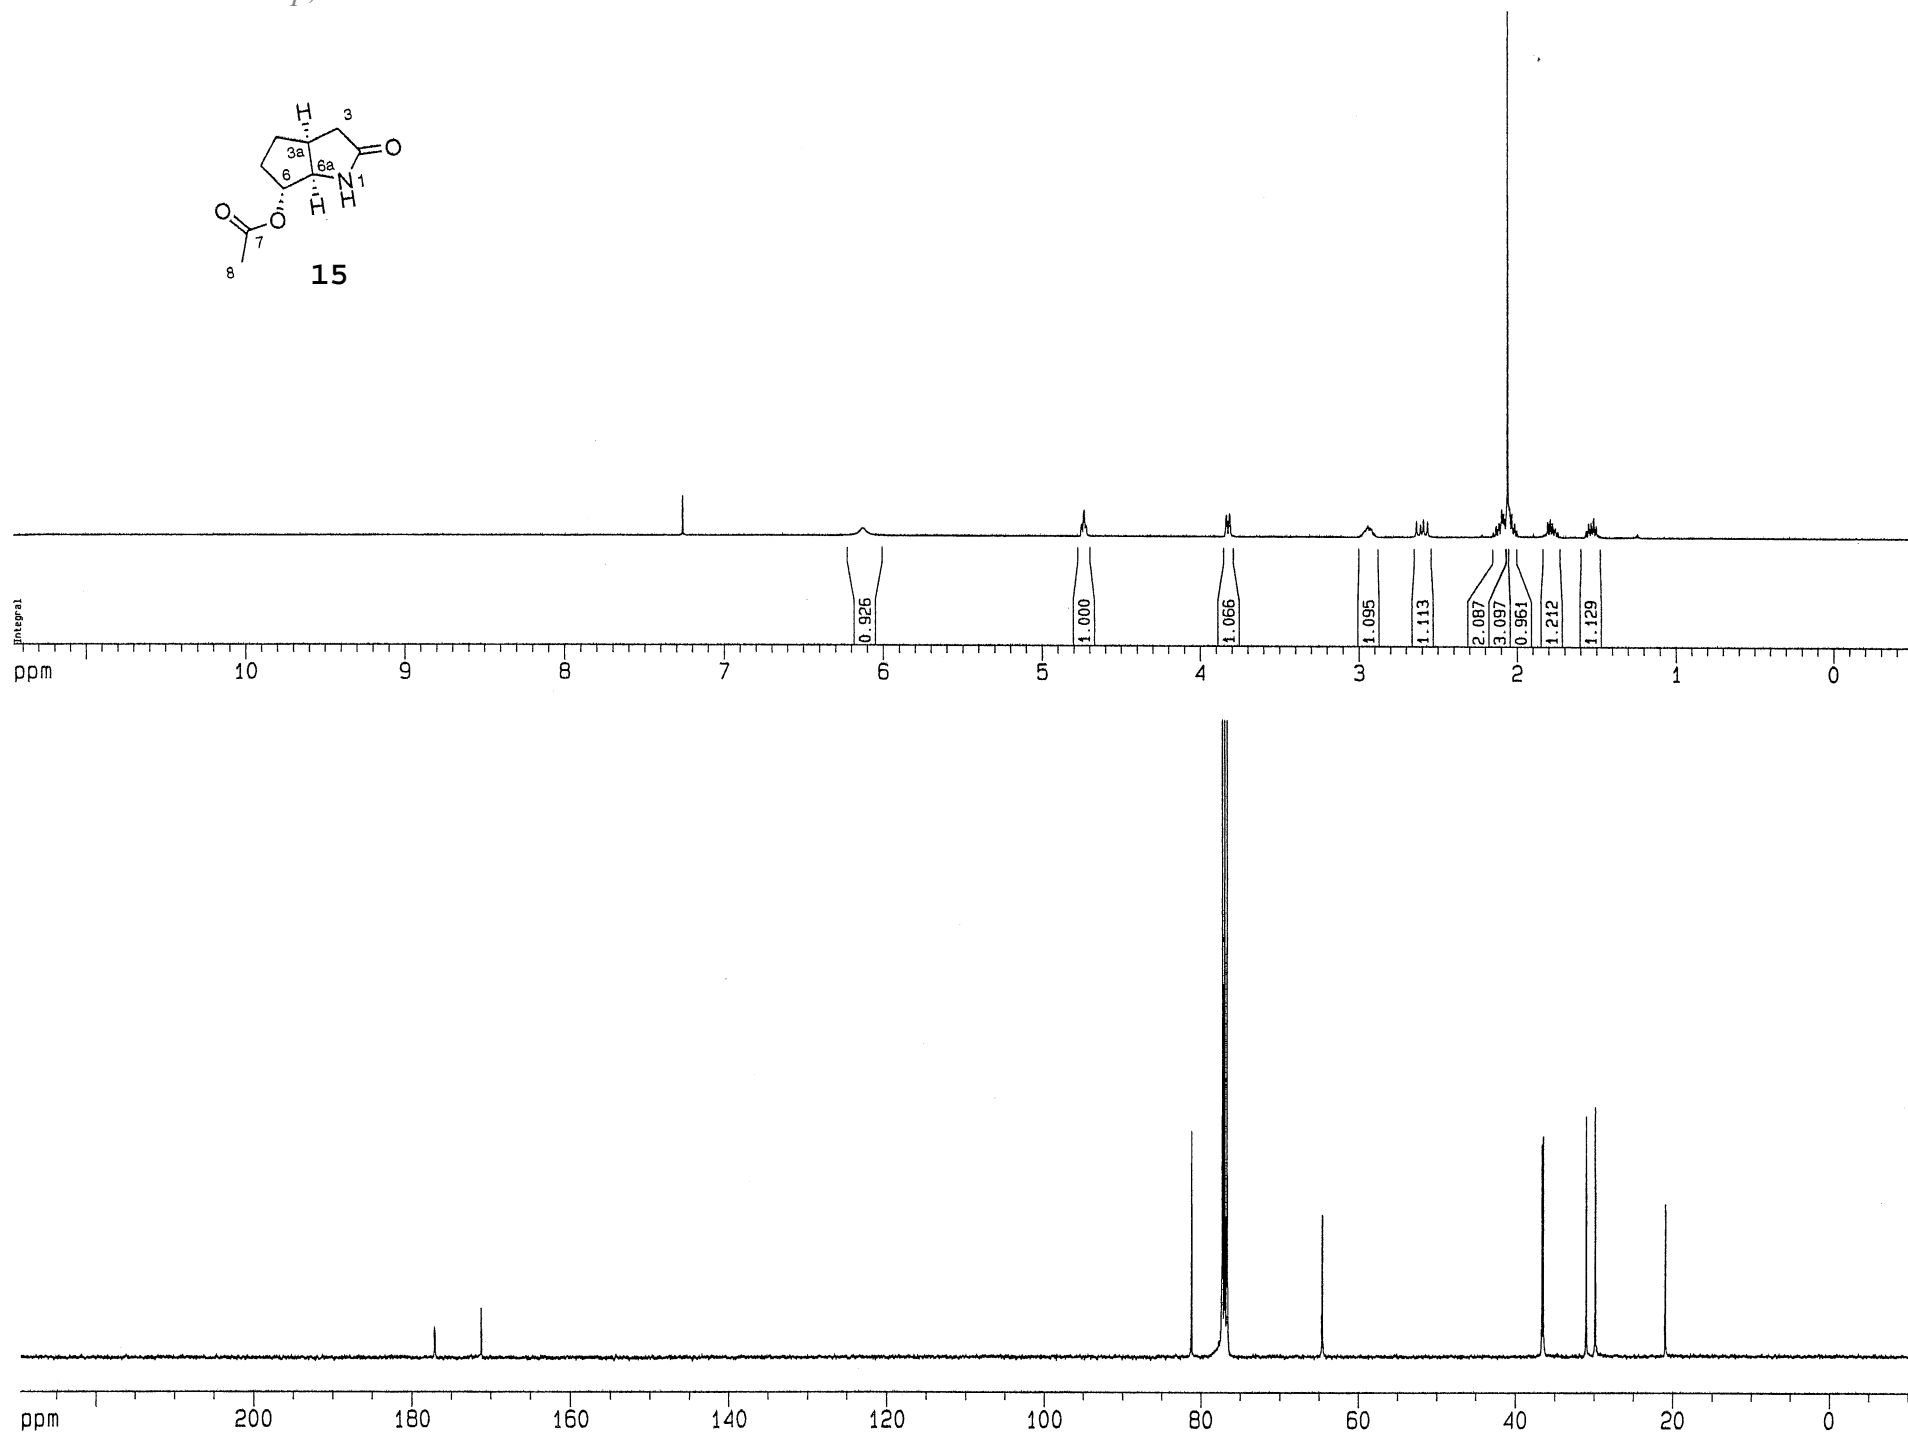

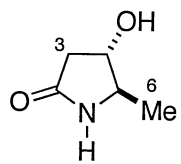

16

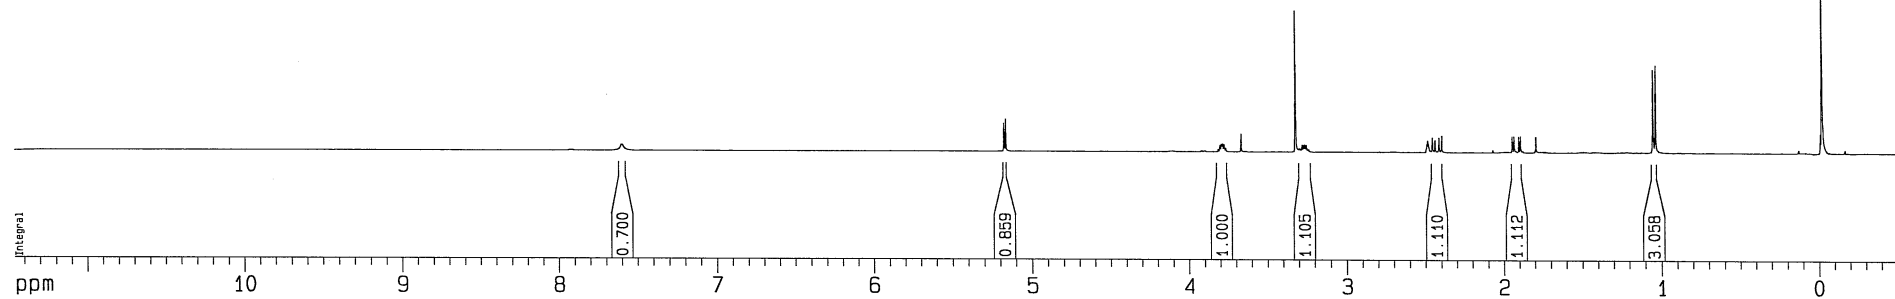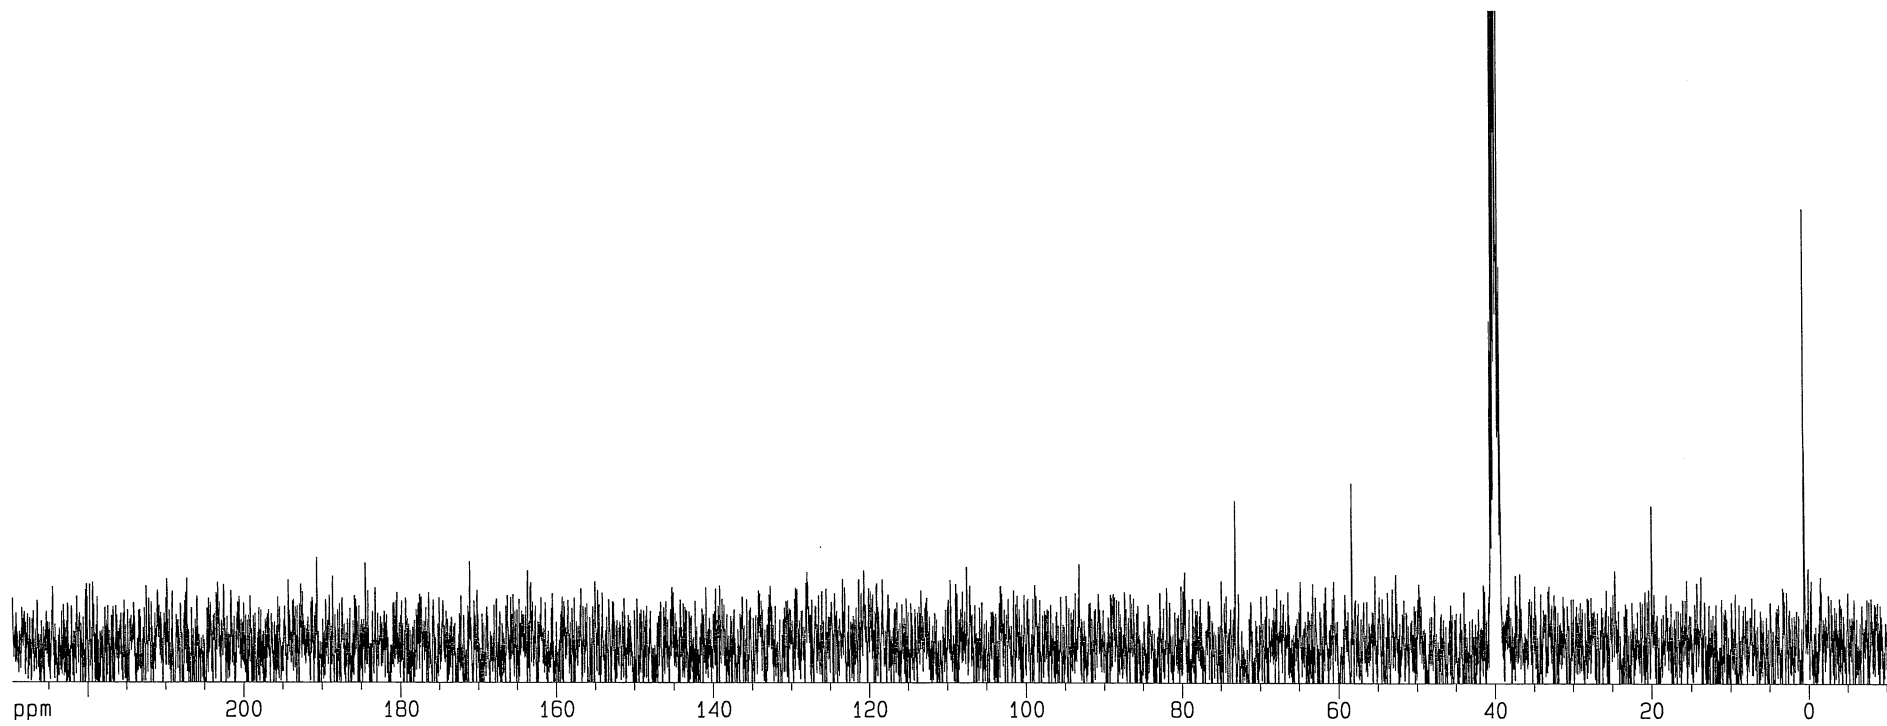

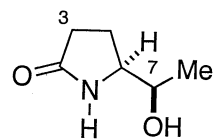

17

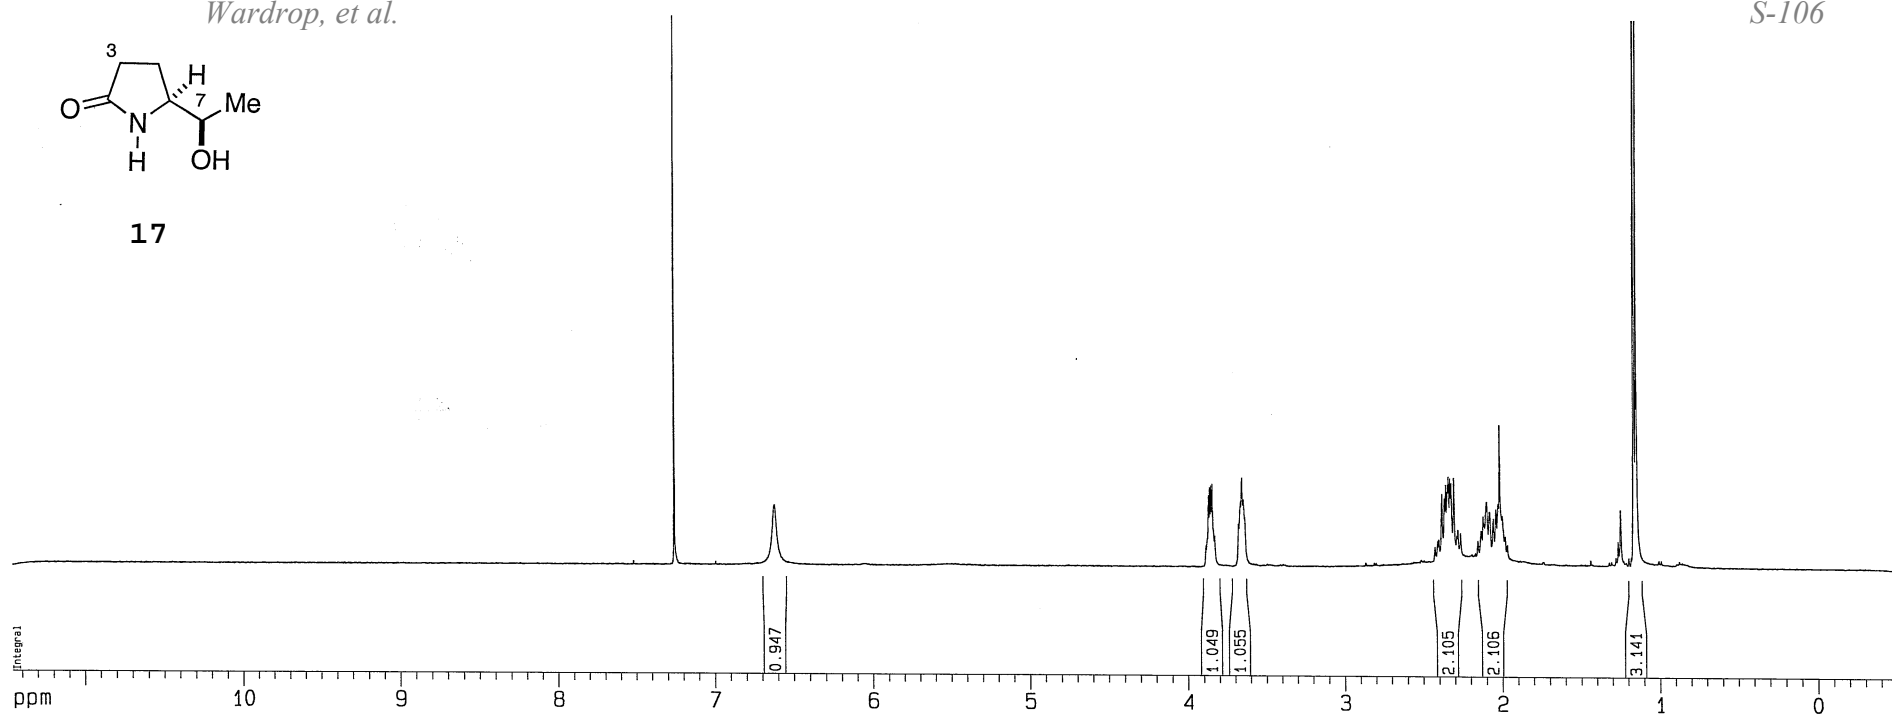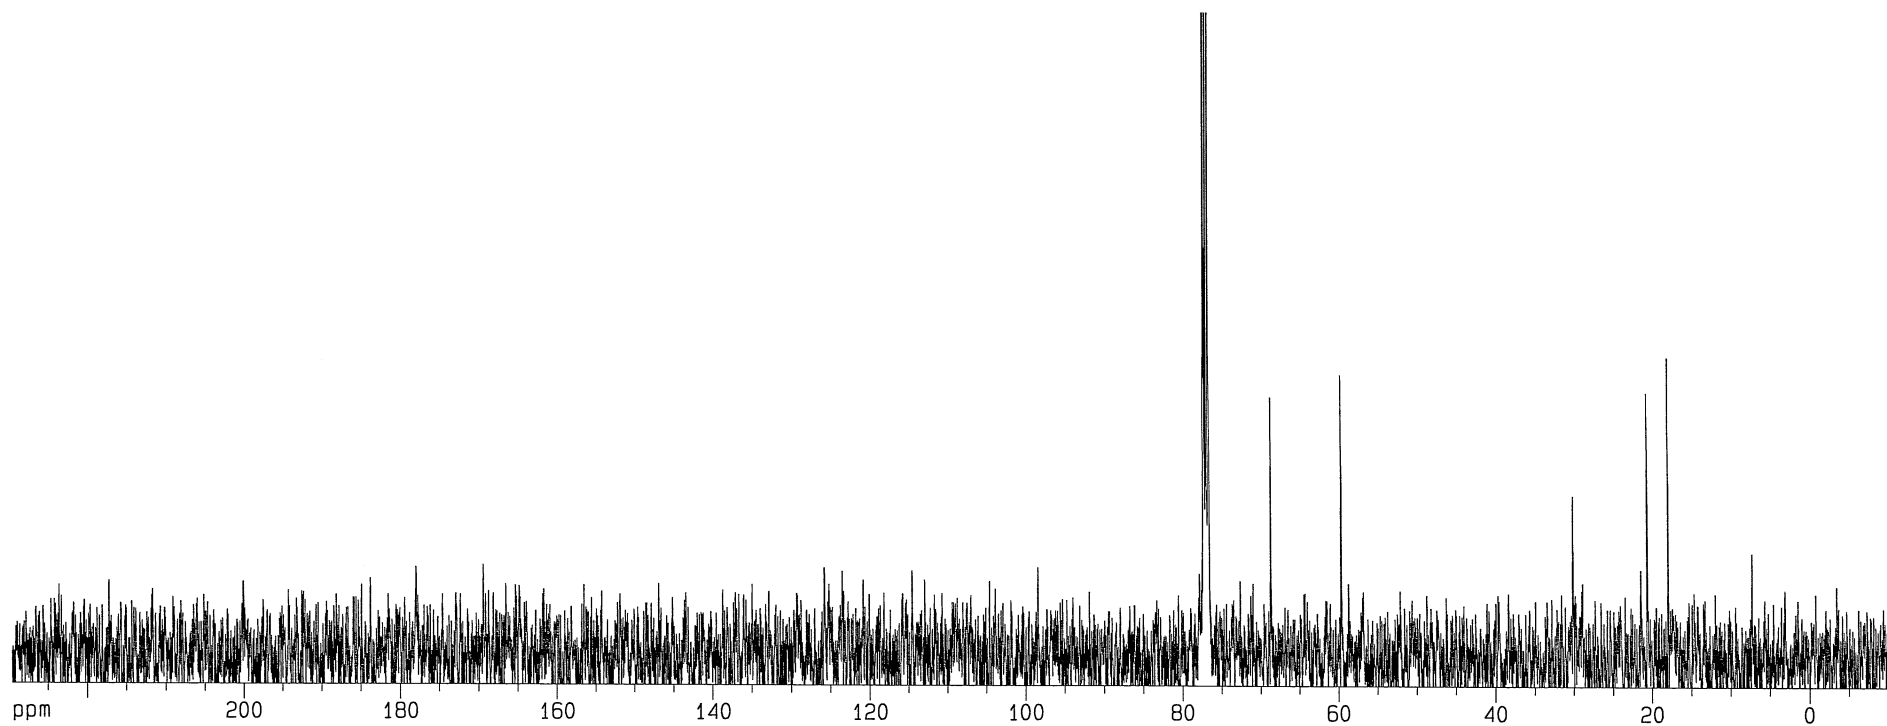

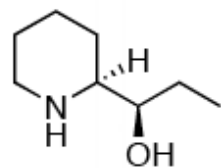

(±)-Alpha-Conhydrine (18)

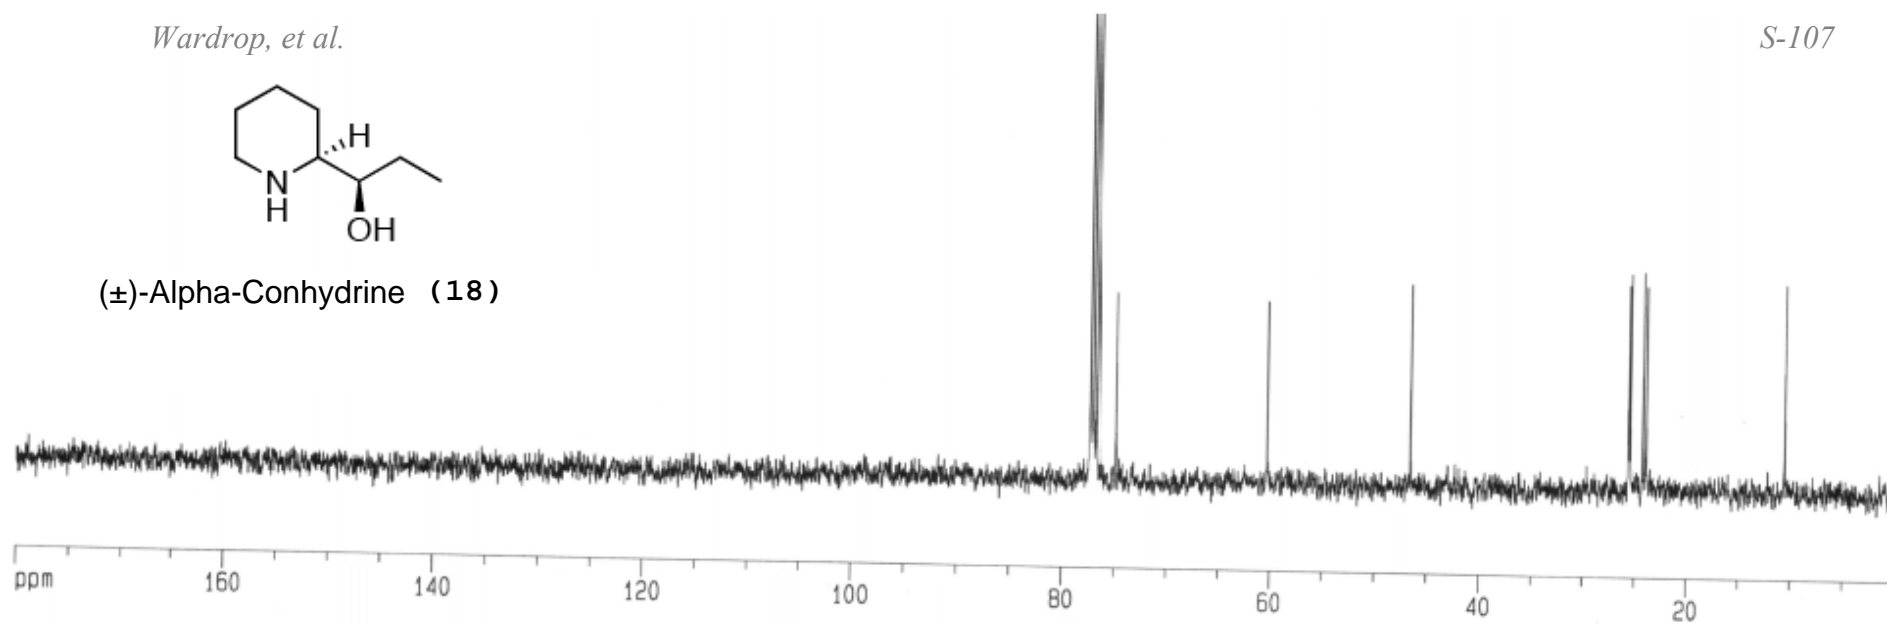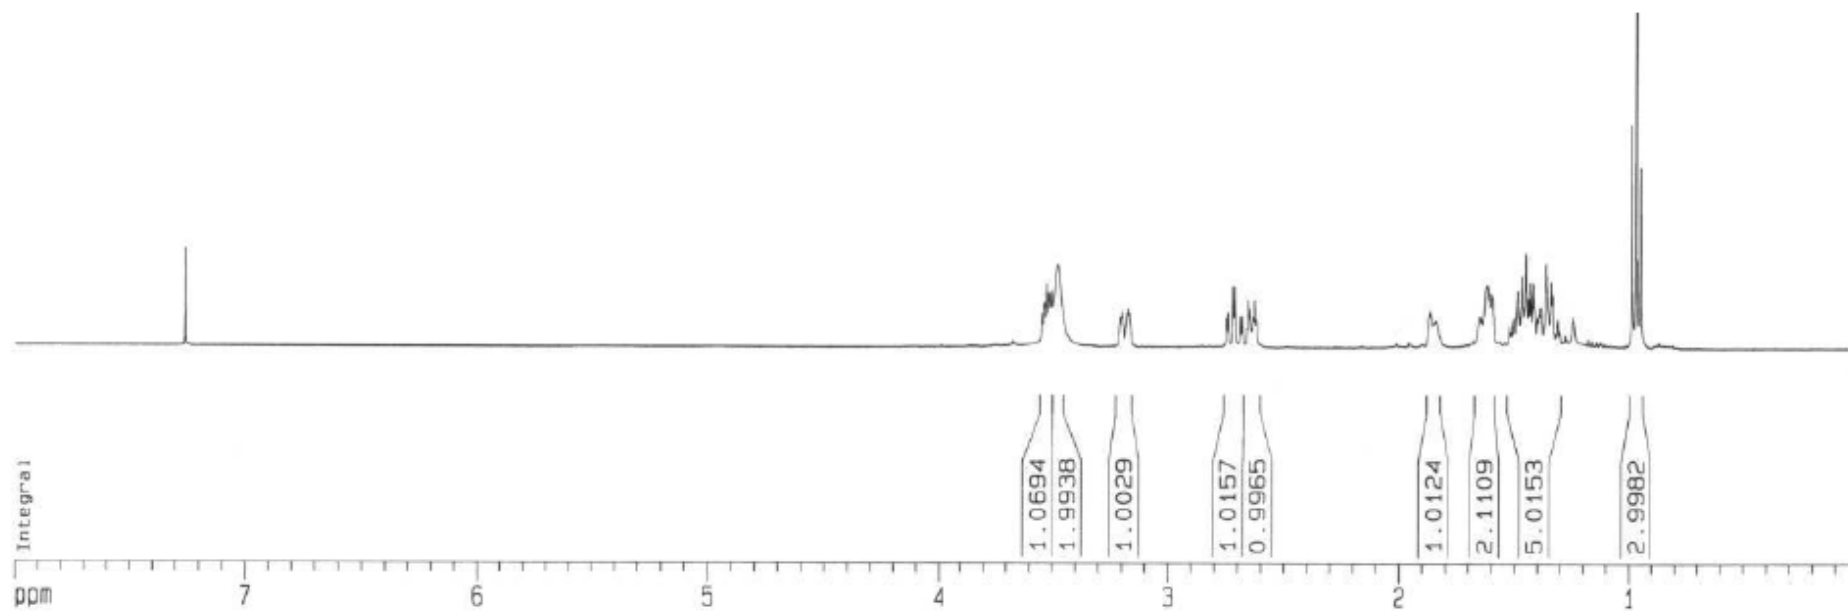

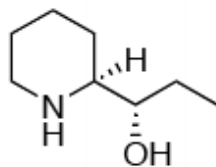

(±)-Beta-Conhydrine (19)

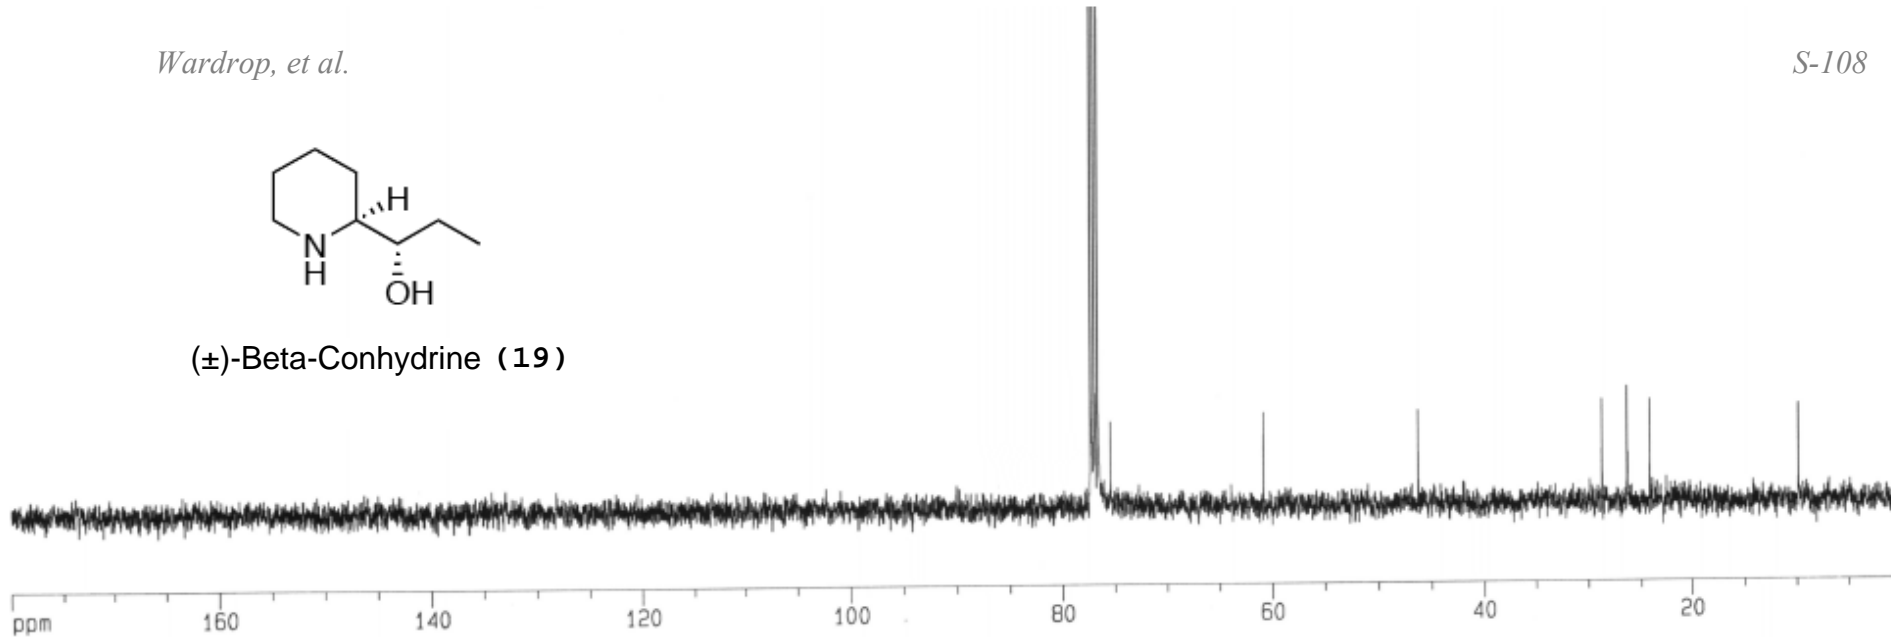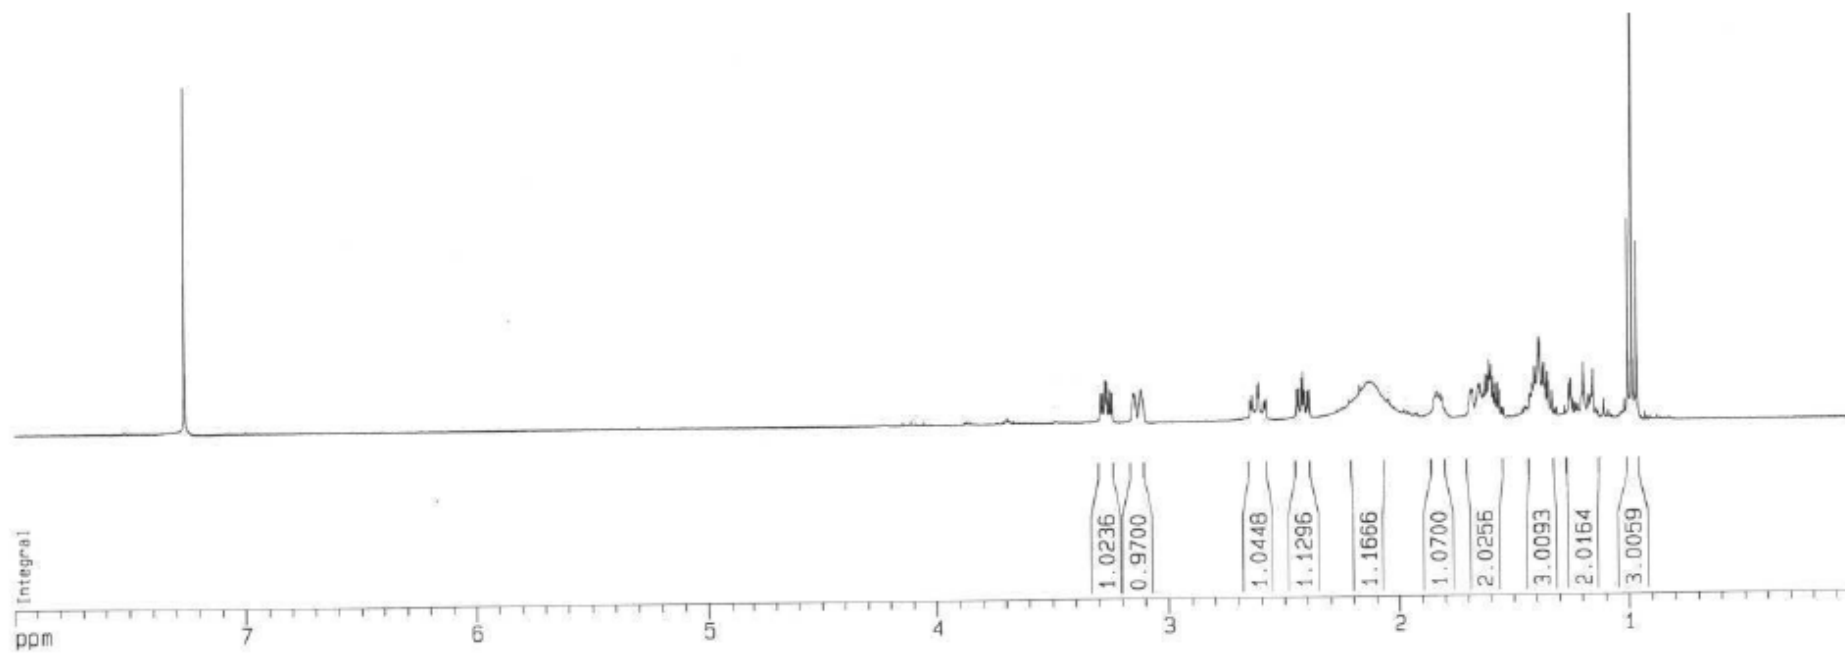

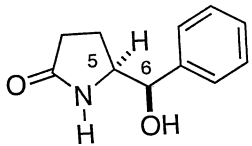

20

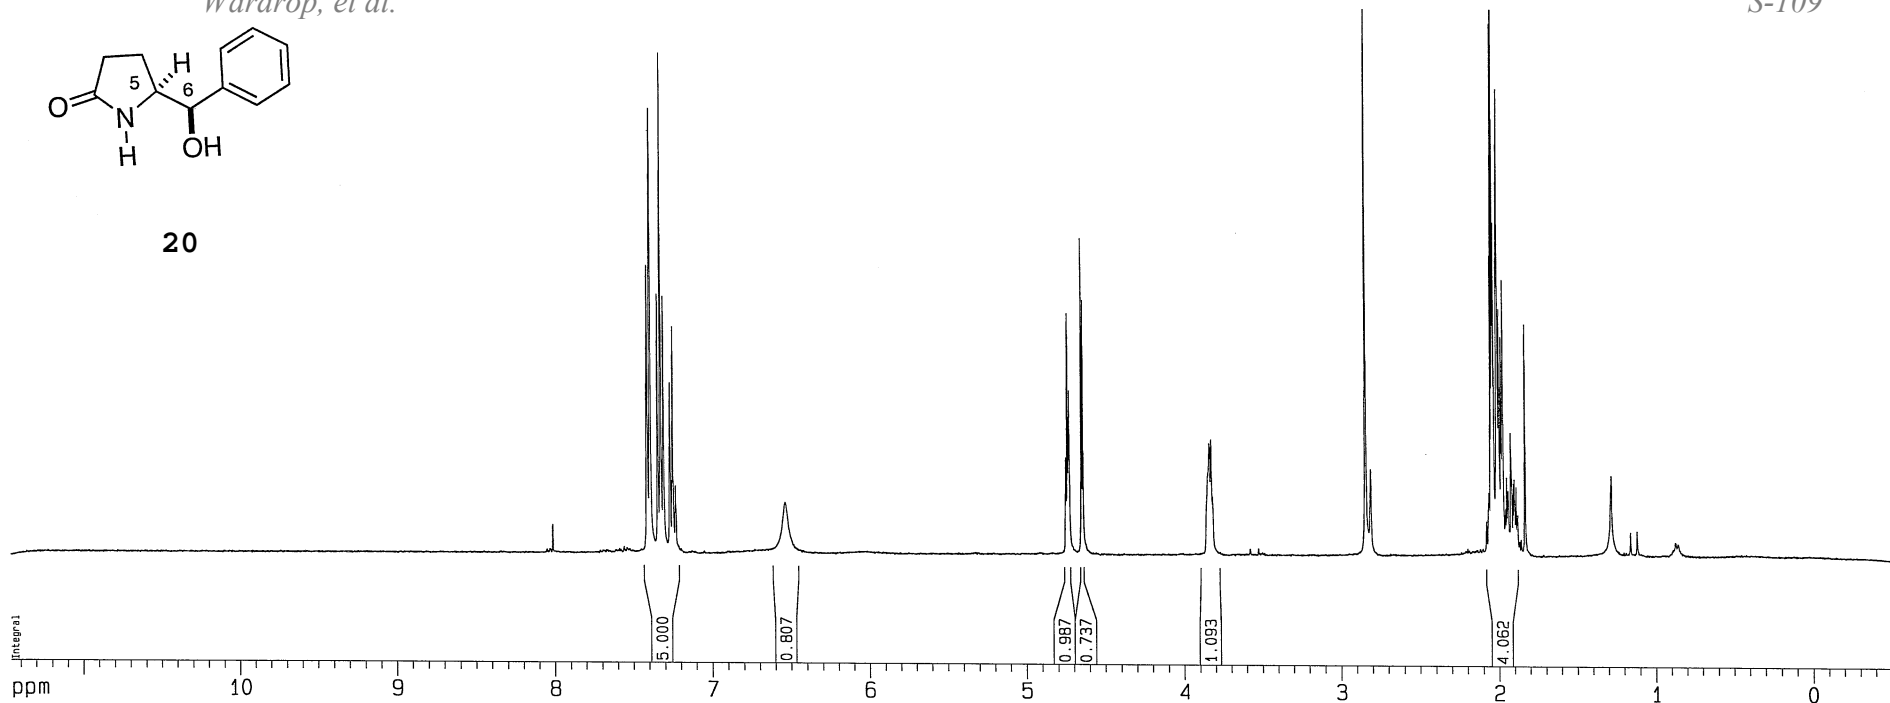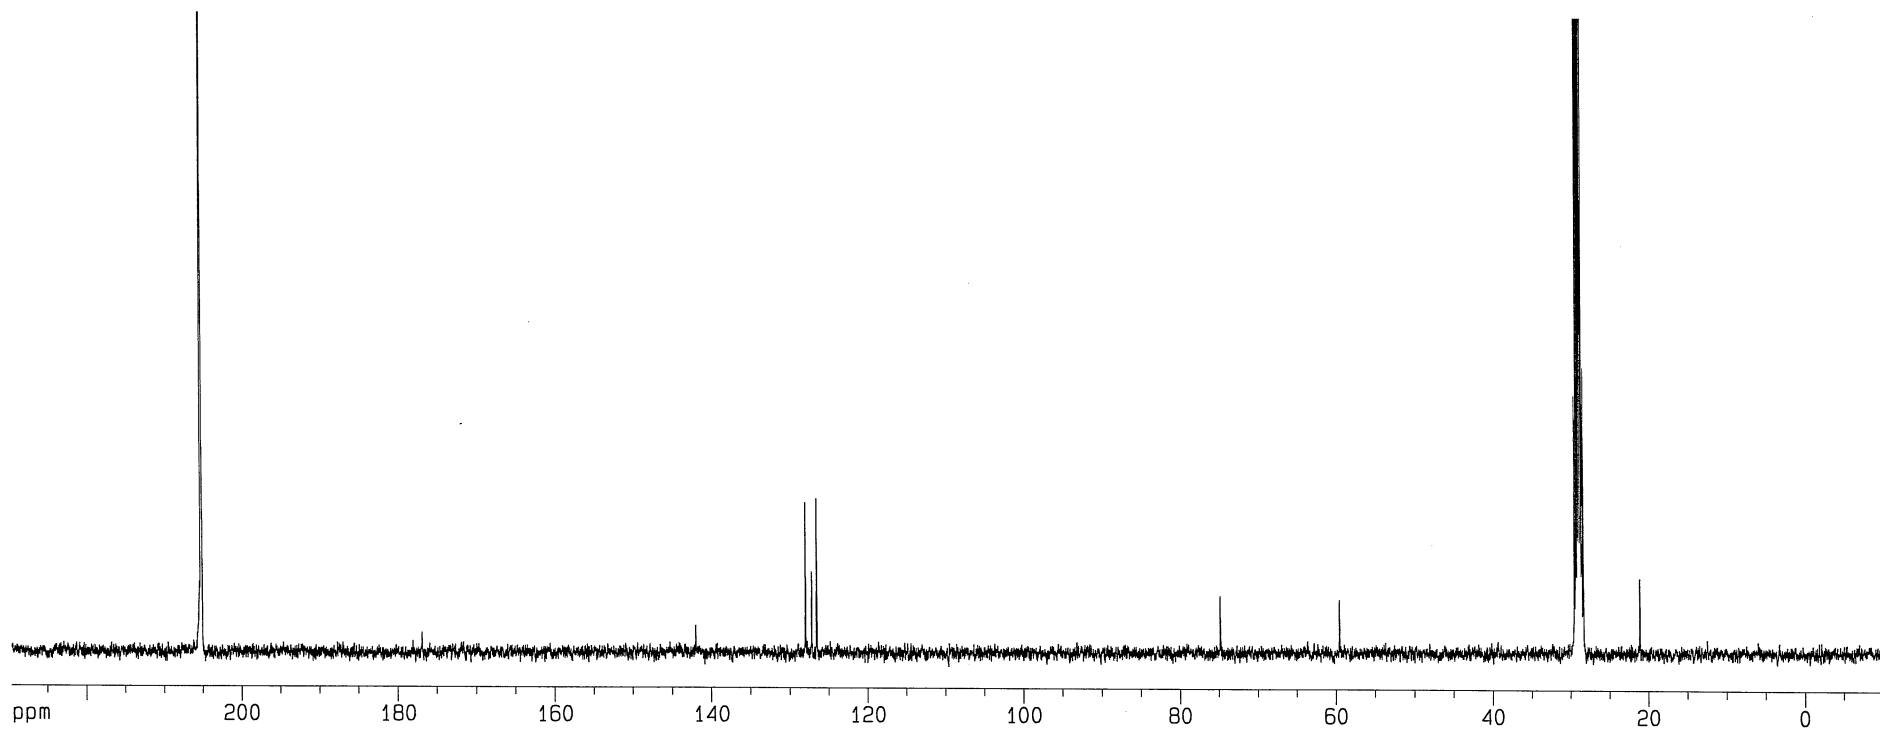

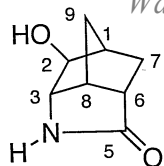

21

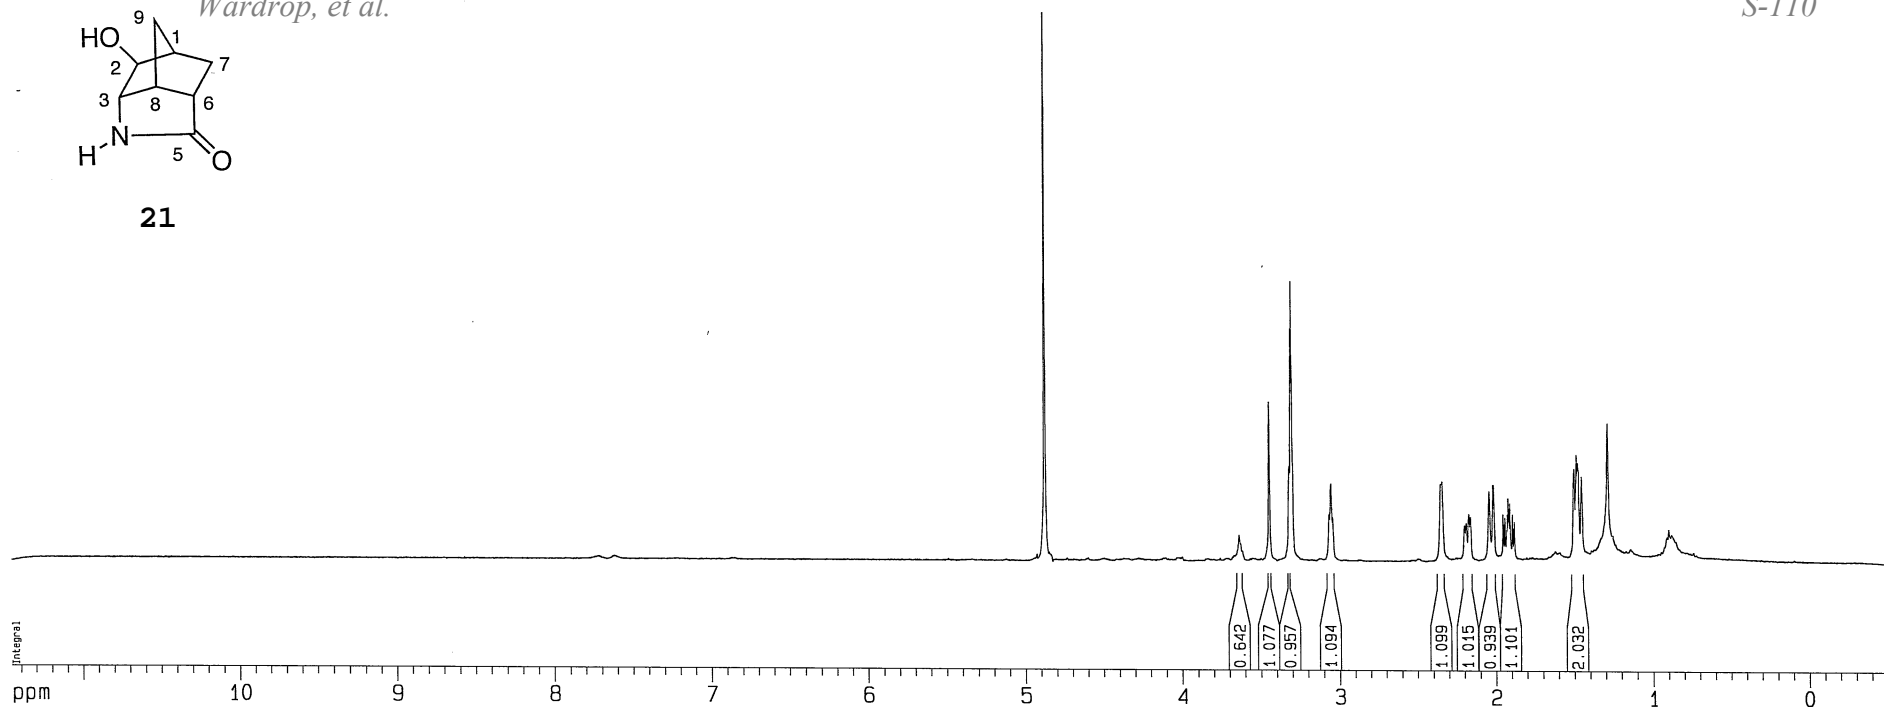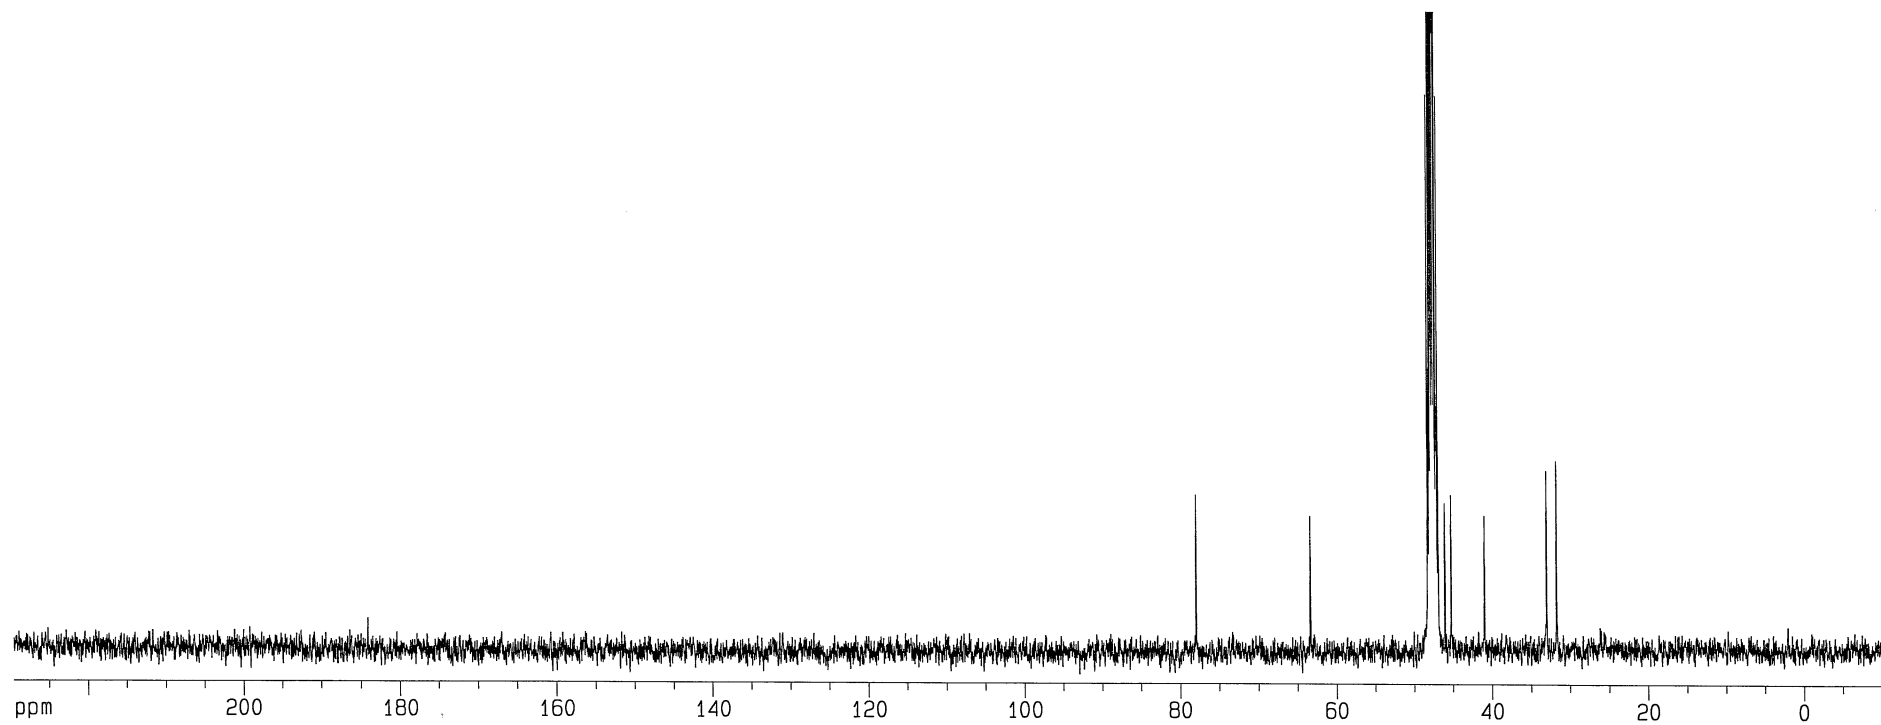

Supplement: NIHMS150020-supplement-2_si_002.pdf [file NIHMS150020-supplement-2_si_002.pdf]
